# Supplementary material for: A High-performance Osmotic Energy Conversion Membrane Enabled by Cu2+-crosslinked Polyamide Acid
Source: Research Square preprint supplement (doi:10.21203/rs.3.rs-3574717/v1), 2023-11-21
Supplement: Supplementary file 1 [file 1a9c57dfc3cc7170c45b0d89.xlsx]

## Sheet: Fig. 2e
972.18	7576.62	7483.44	7499.41	7474.15	7508.69
972.08	7471.05	7480.84	7496.94	7471.48	7506.31
971.98	7358.9	7477.56	7493.8	7468.12	7503.24
971.88	7463.04	7464.26	7480.64	7454.74	7490.16
971.78	7534.41	7458.31	7474.82	7448.71	7484.43
971.68	7431.12	7444.48	7461.13	7434.8	7470.81
971.58	7491.94	7416.13	7432.92	7406.37	7442.68
971.48	7411.74	7386.57	7403.5	7376.72	7413.35
971.38	7342.99	7362.7	7379.77	7352.77	7389.7
971.28	7347.98	7321.67	7338.89	7311.66	7348.9
971.18	7480.75	7295.52	7312.88	7285.43	7322.98
971.08	7186.41	7268.19	7285.7	7258.01	7295.88
970.98	7309.71	7240.61	7258.26	7230.34	7268.53
970.88	7228.57	7213.28	7231.07	7202.92	7241.43
970.78	7228.24	7201.08	7219.02	7190.64	7229.46
970.68	7176.26	7182.05	7200.15	7171.52	7210.67
970.58	7221.67	7170.09	7188.35	7159.48	7198.96
970.48	7105.82	7143.74	7162.15	7133.04	7172.85
970.38	7326.91	7116.58	7135.14	7105.79	7145.94
970.28	7106.02	7080.79	7099.5	7069.9	7110.39
970.18	7124.48	7037.31	7056.18	7026.33	7067.15
970.08	7133.89	6984.91	7003.94	6973.84	7015.01
969.98	7009.04	6946.49	6965.68	6935.33	6976.84
969.88	6992.34	6904.55	6923.89	6893.29	6935.15
969.78	6988.94	6873.03	6892.54	6861.68	6903.89
969.68	6868.26	6853.72	6873.39	6842.27	6884.84
969.58	6863.36	6833.36	6853.2	6821.82	6864.74
969.48	6939.91	6812.15	6832.15	6800.51	6843.79
969.38	6915.5	6795.98	6816.15	6784.24	6827.89
969.28	6822.98	6777.81	6798.16	6765.98	6809.99
969.18	6817.84	6755.03	6775.54	6743.09	6787.47
969.08	6842.06	6734.66	6755.35	6722.63	6767.38
968.98	6802.09	6714.23	6735.09	6702.1	6747.23
968.88	6820.09	6692.76	6713.8	6680.52	6726.03
968.78	6740.71	6672.87	6694.08	6660.53	6706.42
968.68	6690.22	6660.36	6681.75	6647.92	6694.2
968.58	6596.59	6651.49	6673.06	6638.95	6685.61
968.48	6649.47	6646.34	6668.09	6633.68	6680.74
968.38	6614.59	6641.85	6663.79	6629.1	6676.54
968.28	6649.33	6637.51	6659.63	6624.65	6672.49
968.18	6623.42	6630.01	6652.31	6617.04	6665.29
968.08	6711.56	6623.21	6645.7	6610.13	6658.78
967.98	6562.83	6614.52	6637.2	6601.33	6650.39
967.88	6601.7	6603.36	6626.23	6590.06	6639.53
967.78	6644.92	6589	6612.06	6575.58	6625.47
967.68	6623.94	6579.87	6603.12	6566.34	6616.65
967.58	6488.97	6570.51	6593.96	6556.87	6607.6
967.48	6499.92	6558.1	6581.75	6544.35	6595.5
967.38	6621.26	6544.5	6568.34	6530.63	6582.21
967.28	6600.3	6534.19	6558.23	6520.2	6572.22
967.18	6451.75	6518.28	6542.53	6504.18	6556.63
967.08	6521.12	6492.57	6517.02	6478.35	6531.24
966.98	6519.92	6470.39	6495.05	6456.05	6509.39
966.88	6454.95	6454.5	6479.36	6440.04	6493.82
966.78	6419.89	6436.77	6461.84	6422.18	6476.42
966.68	6390.37	6414.46	6439.74	6399.75	6454.44
966.58	6475.1	6396.81	6422.3	6381.98	6437.13
966.48	6379.31	6386.63	6412.33	6371.67	6427.29
966.38	6310.61	6383.78	6409.7	6368.7	6424.78
966.28	6301.77	6372.24	6398.38	6357.03	6413.58
966.18	6460.7	6365.32	6391.68	6349.99	6407.02
966.08	6388.41	6365.3	6391.88	6349.84	6407.35
965.98	6288.46	6360.31	6387.11	6344.71	6402.7
965.88	6448.65	6353.6	6380.63	6337.88	6396.35
965.78	6325.44	6347.78	6375.03	6331.92	6390.89
965.68	6403.96	6347.58	6375.06	6331.59	6391.05
965.58	6193.11	6346.68	6374.4	6330.56	6390.52
965.48	6319.63	6346.15	6374.09	6329.89	6390.35
965.38	6419.88	6343.55	6371.73	6327.16	6388.12
965.28	6427.27	6341.08	6369.5	6324.55	6386.03
965.18	6380.13	6335.12	6363.77	6318.45	6380.44
965.08	6363	6327.37	6356.27	6310.56	6373.08
964.98	6383.45	6317.53	6346.67	6300.58	6363.62
964.88	6493.32	6308.78	6338.17	6291.69	6355.26
964.78	6322.43	6299.38	6329.01	6282.14	6346.25
964.68	6373.53	6286.91	6316.79	6269.53	6334.17
964.58	6482.91	6275.8	6305.93	6258.28	6323.46
964.48	6254.94	6268.24	6298.63	6250.57	6316.3
964.38	6255.1	6261.14	6291.77	6243.31	6309.59
964.28	6264.88	6256.95	6287.85	6238.98	6305.82
964.18	6186.31	6257.09	6288.25	6238.97	6306.37
964.08	6233.69	6256.97	6288.38	6238.69	6306.66
963.98	6494.33	6256.73	6288.4	6238.3	6306.83
963.88	6362.61	6256.29	6288.23	6237.71	6306.81
963.78	6444.87	6255.67	6287.88	6236.93	6306.62
963.68	6346.83	6254.78	6287.26	6235.89	6306.16
963.58	6480.46	6253.9	6286.65	6234.84	6305.7
963.48	6486.86	6252.92	6285.95	6233.71	6305.16
963.38	6441.41	6252.08	6285.39	6232.71	6304.76
963.28	6316.65	6251.39	6284.97	6231.85	6304.51
963.18	6209.5	6250.69	6284.56	6230.99	6304.26
963.08	6476.85	6250.06	6284.21	6230.19	6304.08
962.98	6431.87	6249.47	6283.91	6229.44	6303.95
962.88	6391.03	6248.87	6283.6	6228.67	6303.8
962.78	6329.21	6247.96	6282.98	6227.59	6303.35
962.68	6498.03	6247.19	6282.5	6226.65	6303.04
962.58	6336.85	6246.51	6282.12	6225.79	6302.83
962.48	6348.68	6245.67	6281.58	6224.79	6302.47
962.38	6526.77	6244.83	6281.04	6223.77	6302.1
962.28	6336.04	6244.19	6280.71	6222.95	6301.95
962.18	6306.71	6243.61	6280.42	6222.19	6301.84
962.08	6288.5	6243.19	6280.32	6221.59	6301.92
961.98	6186.97	6243.01	6280.45	6221.23	6302.23
961.88	6314.85	6242.74	6280.5	6220.78	6302.46
961.78	6410.6	6242.57	6280.64	6220.42	6302.78
961.68	6223.35	6242.31	6280.7	6219.98	6303.04
961.58	6360.32	6241.92	6280.63	6219.4	6303.15
961.48	6316.15	6241.55	6280.59	6218.84	6303.3
961.38	6285.79	6241.24	6280.6	6218.34	6303.5
961.28	6363.2	6240.92	6280.61	6217.83	6303.7
961.18	6228.49	6240.64	6280.67	6217.36	6303.96
961.08	6314.39	6240.39	6280.75	6216.91	6304.23
960.98	6297.44	6240.15	6280.86	6216.48	6304.53
960.88	6269.9	6239.9	6280.94	6216.02	6304.82
960.78	6383.09	6239.65	6281.04	6215.58	6305.11
960.68	6215.69	6239.33	6281.06	6215.05	6305.34
960.58	6383.6	6238.85	6280.94	6214.37	6305.42
960.48	6437.82	6238.34	6280.78	6213.65	6305.46
960.38	6303.66	6237.89	6280.69	6213	6305.58
960.28	6316.6	6237.27	6280.42	6212.17	6305.52
960.18	6380.72	6236.77	6280.29	6211.46	6305.6
960.08	6265.01	6236.44	6280.32	6210.91	6305.85
959.98	6282.75	6236.16	6280.41	6210.42	6306.15
959.88	6253.93	6235.89	6280.51	6209.94	6306.47
959.78	6308.1	6235.62	6280.62	6209.45	6306.79
959.68	6378.78	6235.39	6280.76	6209	6307.16
959.58	6233.46	6235.05	6280.8	6208.44	6307.42
959.48	6378.93	6234.66	6280.8	6207.82	6307.64
959.38	6297.65	6234.31	6280.83	6207.24	6307.89
959.28	6277.48	6234.02	6280.93	6206.73	6308.22
959.18	6318.06	6233.62	6280.93	6206.1	6308.45
959.08	6327.06	6233.27	6280.97	6205.52	6308.72
958.98	6342.95	6232.93	6281.04	6204.94	6309.02
958.88	6280.93	6232.44	6280.96	6204.22	6309.17
958.78	6412.76	6231.99	6280.92	6203.54	6309.37
958.68	6282.96	6231.71	6281.05	6203.02	6309.75
958.58	6168.6	6231.38	6281.14	6202.44	6310.08
958.48	6391.55	6231.1	6281.29	6201.93	6310.47
958.38	6227.54	6230.93	6281.55	6201.5	6310.97
958.28	6323.3	6230.8	6281.88	6201.14	6311.54
958.18	6231.11	6230.59	6282.12	6200.67	6312.03
958.08	6255.24	6230.5	6282.5	6200.34	6312.67
957.98	6272.26	6230.22	6282.71	6199.8	6313.13
957.88	6409.53	6229.99	6282.99	6199.31	6313.67
957.78	6276.69	6229.75	6283.3	6198.81	6314.23
957.68	6236.88	6229.61	6283.74	6198.41	6314.94
957.58	6163.87	6229.46	6284.24	6198.01	6315.69
957.48	6273.96	6229.61	6285.09	6197.89	6316.81
957.38	6143.2	6229.81	6286.07	6197.82	6318.05
957.28	6238.5	6229.98	6287.13	6197.73	6319.39
957.18	6256.2	6230.15	6288.33	6197.63	6320.86
957.08	6164.7	6230.4	6289.77	6197.61	6322.57
956.98	6206.01	6230.57	6291.33	6197.5	6324.4
956.88	6223.79	6230.79	6293.19	6197.44	6326.54
956.78	6136.79	6230.95	6295.29	6197.32	6328.92
956.68	6300.61	6231.04	6297.69	6197.13	6331.6
956.58	6212.4	6230.99	6300.38	6196.8	6334.58
956.48	6307.43	6230.98	6303.62	6196.49	6338.1
956.38	6201.57	6230.78	6307.27	6196	6342.05
956.28	6266.74	6230.59	6311.63	6195.52	6346.7
956.18	6290.51	6230.35	6316.74	6195	6352.1
956.08	6243.65	6230.08	6322.71	6194.42	6358.37
955.98	6337.56	6229.58	6329.46	6193.62	6365.42
955.88	6357.67	6228.82	6337.08	6192.57	6373.33
955.78	6445.89	6227.87	6345.7	6191.31	6382.26
955.68	6433.56	6226.66	6355.38	6189.79	6392.25
955.58	6415.59	6225.39	6366.39	6188.21	6403.56
955.48	6379.82	6224.05	6378.78	6186.56	6416.27
955.38	6396.41	6222.84	6392.77	6185.03	6430.58
955.28	6355.72	6221.5	6408.15	6183.38	6446.27
955.18	6513.85	6219.94	6424.77	6181.5	6463.21
955.08	6566.9	6218.2	6442.61	6179.44	6481.38
954.98	6501.58	6216.3	6461.61	6177.22	6500.69
954.88	6498.99	6214.02	6481.36	6174.61	6520.78
954.78	6622.99	6211.77	6502.1	6172.02	6541.85
954.68	6485.33	6209.59	6523.63	6169.51	6563.71
954.58	6499.7	6207.36	6545.54	6166.94	6585.95
954.48	6534.95	6205.01	6567.43	6164.25	6608.19
954.38	6571.26	6202.57	6589	6161.47	6630.1
954.28	6674.43	6200.06	6609.88	6158.61	6651.32
954.18	6525.57	6197.22	6629.43	6155.44	6671.22
954.08	6717.94	6194.16	6647.34	6152.02	6689.48
953.98	6689.11	6191.02	6663.38	6148.53	6705.88
953.88	6608.51	6187.97	6677.35	6145.12	6720.21
953.78	6600.94	6184.76	6688.67	6141.55	6731.88
953.68	6625.87	6181.69	6697.35	6138.11	6740.92
953.58	6601.38	6178.82	6703.21	6134.88	6747.15
953.48	6528.14	6175.88	6705.8	6131.57	6750.1
953.38	6651.4	6172.8	6704.95	6128.13	6749.63
953.28	6682.69	6169.61	6700.4	6124.56	6745.46
953.18	6697.6	6166.27	6691.55	6120.84	6736.98
953.08	6688.15	6162.73	6678.4	6116.92	6724.21
952.98	6661.88	6159.37	6661.54	6113.18	6707.74
952.88	6502.09	6155.93	6640.99	6109.35	6687.58
952.78	6726.73	6152.52	6617.21	6105.54	6664.18
952.68	6664.77	6149.04	6590.51	6101.67	6637.88
952.58	6717.07	6145.82	6561.67	6098.05	6609.43
952.48	6465.2	6142.63	6530.94	6094.46	6579.11
952.38	6464.32	6139.99	6499.35	6091.41	6547.92
952.28	6322.86	6137.63	6467.11	6088.65	6516.09
952.18	6447.07	6135.64	6434.81	6086.25	6484.2
952.08	6443.1	6133.86	6402.73	6084.06	6452.53
951.98	6308.47	6132.12	6371.11	6081.89	6421.33
951.88	6434.55	6130.35	6340.27	6079.71	6390.91
951.78	6326.83	6128.74	6310.7	6077.67	6361.77
951.68	6332.39	6127.4	6282.8	6075.91	6334.3
951.58	6235.91	6126.08	6256.49	6074.15	6308.42
951.48	6295.91	6124.79	6231.95	6072.42	6284.31
951.38	6406.08	6123.59	6209.33	6070.79	6262.14
951.28	6252.64	6122.84	6189.04	6069.59	6242.29
951.18	6011.49	6122.22	6170.76	6068.53	6224.45
951.08	6135.47	6121.78	6154.49	6067.64	6208.64
950.98	6165.73	6121.62	6140.28	6067.02	6194.88
950.88	6205.3	6121.52	6127.79	6066.46	6182.84
950.78	6214.99	6121.26	6116.71	6065.74	6172.23
950.68	6121.96	6120.87	6106.93	6064.88	6162.92
950.58	6226.33	6120.6	6098.58	6064.14	6155.04
950.48	6081.46	6120.37	6091.44	6063.44	6148.37
950.38	6173.04	6120.01	6085.2	6062.61	6142.61
950.28	6306.22	6119.79	6080.01	6061.9	6137.9
950.18	6023.35	6119.68	6075.71	6061.31	6134.08
950.08	6147.55	6119.35	6071.85	6060.48	6130.71
949.98	6244.39	6118.97	6068.52	6059.61	6127.87
949.88	6203.19	6118.86	6065.93	6059	6125.79
949.78	6110.39	6118.52	6063.51	6058.16	6123.87
949.68	6189.96	6118	6061.24	6057.13	6122.1
949.58	6274.99	6117.61	6059.36	6056.24	6120.74
949.48	6144.53	6117.39	6057.86	6055.5	6119.75
949.38	6086	6117.29	6056.65	6054.88	6119.06
949.28	6025.24	6117.37	6055.75	6054.43	6118.69
949.18	6063.57	6117.83	6055.34	6054.36	6118.8
949.08	6002.59	6118.35	6055.07	6054.35	6119.06
948.98	6094.43	6118.84	6054.83	6054.31	6119.36
948.88	6152.47	6119.25	6054.56	6054.18	6119.63
948.78	6253.94	6119.66	6054.32	6054.05	6119.93
948.68	6073.14	6120	6054.03	6053.83	6120.19
948.58	6193.7	6120.31	6053.72	6053.58	6120.44
948.48	6184.2	6120.63	6053.45	6053.35	6120.73
948.38	6113.8	6120.99	6053.2	6053.14	6121.05
948.28	6199.2	6121.37	6053	6052.96	6121.42
948.18	5998.05	6121.76	6052.8	6052.77	6121.79
948.08	6197.46	6122.19	6052.64	6052.62	6122.21
947.98	6092.32	6122.64	6052.5	6052.48	6122.65
947.88	6090.28	6123.09	6052.36	6052.35	6123.1
947.78	6181.12	6123.47	6052.14	6052.13	6123.47
947.68	6218.63	6123.9	6051.97	6051.97	6123.91
947.58	6047.7	6124.42	6051.88	6051.88	6124.42
947.48	5913.97	6124.88	6051.74	6051.74	6124.88
947.38	6219.4	6125.43	6051.67	6051.66	6125.43
947.28	6002.96	6125.97	6051.59	6051.59	6125.97
947.18	6227.26	6126.49	6051.49	6051.49	6126.49
947.08	6111.84	6126.94	6051.31	6051.31	6126.94
946.98	6118.1	6127.45	6051.19	6051.19	6127.45
946.88	6064.68	6127.89	6050.98	6050.98	6127.89
946.78	6202.89	6128.39	6050.84	6050.84	6128.39
946.68	6088.18	6128.89	6050.68	6050.68	6128.89
946.58	6129.86	6129.41	6050.55	6050.55	6129.41
946.48	6062.31	6129.96	6050.44	6050.44	6129.96
946.38	6012.32	6130.55	6050.36	6050.36	6130.55
946.28	6123.64	6131.15	6050.29	6050.29	6131.15
946.18	6060.57	6131.79	6050.25	6050.25	6131.79
946.08	6053.9	6132.44	6050.21	6050.21	6132.44
945.98	6061.68	6133.03	6050.12	6050.12	6133.03
945.88	6156.04	6133.61	6050	6050	6133.61
945.78	6185.24	6134.11	6049.8	6049.8	6134.11
945.68	6246.92	6134.54	6049.52	6049.52	6134.54
945.58	6259.46	6134.9	6049.17	6049.17	6134.9
945.48	6246.5	6135.24	6048.79	6048.79	6135.24
945.38	6211.09	6135.58	6048.4	6048.4	6135.58
945.28	6216.55	6135.98	6048.08	6048.08	6135.98
945.18	6083.21	6136.4	6047.76	6047.76	6136.4
945.08	6235.22	6136.85	6047.46	6047.46	6136.85
944.98	6210.48	6137.28	6047.14	6047.14	6137.28
944.88	6242.11	6137.72	6046.82	6046.82	6137.72
944.78	6228.2	6138.1	6046.44	6046.44	6138.1
944.68	6237.37	6138.44	6046.01	6046.01	6138.44
944.58	6334.07	6138.71	6045.5	6045.5	6138.71
944.48	6426	6138.96	6044.98	6044.98	6138.96
944.38	6271.44	6139.2	6044.43	6044.43	6139.2
944.28	6284.72	6139.42	6043.86	6043.86	6139.42
944.18	6303.96	6139.65	6043.28	6043.28	6139.65
944.08	6334.12	6139.93	6042.75	6042.75	6139.93
943.98	6301.59	6140.21	6042.21	6042.21	6140.21
943.88	6294.38	6140.55	6041.73	6041.73	6140.55
943.78	6150.04	6140.96	6041.32	6041.32	6140.96
943.68	6124.54	6141.38	6040.9	6040.9	6141.38
943.58	6331.13	6141.84	6040.52	6040.52	6141.84
943.48	6226.12	6142.33	6040.16	6040.16	6142.33
943.38	6240.67	6142.79	6039.76	6039.76	6142.79
943.28	6230.67	6143.22	6039.33	6039.33	6143.22
943.18	6212.84	6143.72	6038.95	6038.95	6143.72
943.08	6195.08	6144.22	6038.57	6038.57	6144.22
942.98	6220.82	6144.71	6038.18	6038.18	6144.71
942.88	6285.83	6145.28	6037.86	6037.86	6145.28
942.78	6037.66	6145.87	6037.54	6037.54	6145.87
942.68	6202.27	6146.48	6037.24	6037.24	6146.48
942.58	6150.68	6147.1	6036.95	6036.95	6147.1
942.48	6211.66	6147.75	6036.68	6036.68	6147.75
942.38	6219.38	6148.33	6036.32	6036.32	6148.33
942.28	6243.6	6148.99	6036.04	6036.04	6148.99
942.18	6034.15	6149.62	6035.72	6035.72	6149.62
942.08	6229.05	6150.24	6035.39	6035.39	6150.24
941.98	6243.14	6150.87	6035.05	6035.05	6150.87
941.88	6232.07	6151.53	6034.74	6034.74	6151.53
941.78	6173.09	6152.15	6034.38	6034.38	6152.15
941.68	6160.36	6152.82	6034.06	6034.06	6152.82
941.58	6133.86	6153.49	6033.73	6033.73	6153.49
941.48	6246.12	6154.2	6033.44	6033.44	6154.2
941.38	6155.3	6154.94	6033.17	6033.17	6154.94
941.28	6119.41	6155.7	6032.91	6032.91	6155.7
941.18	6117.62	6156.47	6032.65	6032.65	6156.47
941.08	6133.41	6157.31	6032.44	6032.44	6157.31
940.98	6116.38	6158.16	6032.25	6032.25	6158.16
940.88	6116.59	6158.98	6032.01	6032.01	6158.98
940.78	6245.34	6159.79	6031.76	6031.76	6159.79
940.68	6133.1	6160.65	6031.55	6031.55	6160.65
940.58	6047.77	6161.53	6031.34	6031.34	6161.53
940.48	6092.61	6162.36	6031.08	6031.08	6162.36
940.38	6255.44	6163.23	6030.85	6030.85	6163.23
940.28	6168.49	6164.1	6030.61	6030.61	6164.1
940.18	6150.7	6164.95	6030.33	6030.33	6164.95
940.08	6137.65	6165.75	6030.01	6030.01	6165.75
939.98	6221.17	6166.57	6029.69	6029.69	6166.57
939.88	6227.68	6167.31	6029.28	6029.28	6167.31
939.78	6388.83	6168.04	6028.85	6028.85	6168.04
939.68	6220.4	6168.7	6028.35	6028.35	6168.7
939.58	6299.82	6169.38	6027.84	6027.84	6169.38
939.48	6224.17	6170.08	6027.36	6027.36	6170.08
939.38	6183.19	6170.86	6026.94	6026.94	6170.86
939.28	6219.91	6171.66	6026.53	6026.53	6171.66
939.18	6185.19	6172.47	6026.12	6026.12	6172.47
939.08	6316.39	6173.29	6025.71	6025.71	6173.29
938.98	6204.16	6174.19	6025.36	6025.36	6174.19
938.88	6043.77	6175.15	6025.07	6025.07	6175.15
938.78	6069.84	6176.12	6024.77	6024.77	6176.12
938.68	6196.78	6177.22	6024.58	6024.58	6177.22
938.58	6047.99	6178.37	6024.43	6024.43	6178.37
938.48	6115.37	6179.47	6024.21	6024.21	6179.47
938.38	6202.76	6180.55	6023.93	6023.93	6180.55
938.28	6203.41	6181.65	6023.66	6023.66	6181.65
938.18	6206.95	6182.72	6023.32	6023.32	6182.72
938.08	6200.69	6183.82	6022.96	6022.96	6183.82
937.98	6162.99	6185.11	6022.72	6022.72	6185.11
937.88	5890.1	6186.53	6022.56	6022.56	6186.53
937.78	6022.61	6188.1	6022.45	6022.45	6188.1
937.68	6075.39	6189.81	6022.37	6022.37	6189.81
937.58	6141.19	6191.64	6022.25	6022.25	6191.64
937.48	6226.01	6193.6	6022.08	6022.08	6193.6
937.38	6032.84	6195.72	6021.85	6021.85	6195.72
937.28	6174.92	6198.09	6021.58	6021.58	6198.09
937.18	6193.46	6200.78	6021.27	6021.27	6200.78
937.08	6209.01	6203.94	6020.99	6020.99	6203.94
936.98	6154.65	6207.56	6020.65	6020.65	6207.56
936.88	6189.71	6211.82	6020.3	6020.3	6211.82
936.78	6202.29	6216.88	6019.97	6019.97	6216.88
936.68	6116.97	6222.84	6019.64	6019.64	6222.84
936.58	6238.33	6229.91	6019.34	6019.34	6229.91
936.48	6059.6	6238.25	6019.07	6019.07	6238.25
936.38	6123.08	6248.04	6018.81	6018.81	6248.04
936.28	6158.58	6259.39	6018.47	6018.47	6259.39
936.18	6325.45	6272.53	6018.08	6018.08	6272.53
936.08	6366.19	6287.63	6017.6	6017.6	6287.63
935.98	6277.41	6304.87	6017.02	6017.02	6304.87
935.88	6375.45	6324.48	6016.36	6016.36	6324.48
935.78	6350.18	6346.67	6015.67	6015.67	6346.67
935.68	6381.2	6371.55	6014.92	6014.92	6371.55
935.58	6530.15	6399.13	6014.04	6014.04	6399.13
935.48	6598.49	6429.57	6013.11	6013.11	6429.57
935.38	6493.32	6462.81	6012.11	6012.11	6462.81
935.28	6532.52	6498.75	6011.01	6011.01	6498.75
935.18	6620.35	6537.2	6009.78	6009.78	6537.2
935.08	6829.23	6578.03	6008.54	6008.54	6578.03
934.98	6633.84	6620.78	6007.16	6007.16	6620.78
934.88	6832.24	6665.06	6005.67	6005.67	6665.06
934.78	6802.71	6710.4	6004.1	6004.1	6710.4
934.68	6819.61	6756.29	6002.52	6002.52	6756.29
934.58	6837.28	6802.03	6000.88	6000.88	6802.03
934.48	6763.13	6846.96	5999.25	5999.25	6846.96
934.38	6834.36	6890.27	5997.52	5997.52	6890.27
934.28	7008.14	6931.29	5995.82	5995.82	6931.29
934.18	6768.23	6969.23	5994.1	5994.1	6969.23
934.08	6857.06	7003.26	5992.26	5992.26	7003.26
933.98	7062.31	7032.72	5990.33	5990.33	7032.72
933.88	7047.51	7057.13	5988.44	5988.44	7057.13
933.78	6894.11	7075.84	5986.45	5986.45	7075.84
933.68	7032.81	7088.35	5984.26	5984.26	7088.35
933.58	7315.38	7094.53	5982.04	5982.04	7094.53
933.48	7149.18	7094.21	5979.77	5979.77	7094.21
933.38	7150.76	7086.24	5977.44	5977.44	7086.24
933.28	7028.87	7070.1	5974.99	5974.99	7070.1
933.18	7337.67	7046.32	5972.63	5972.63	7046.32
933.08	7078.33	7015.24	5970.25	5970.25	7015.24
932.98	7190.15	6977.58	5967.95	5967.95	6977.58
932.88	6929.39	6934	5965.66	5965.66	6934
932.78	6998.32	6885.49	5963.53	5963.53	6885.49
932.68	6915.55	6832.8	5961.43	5961.43	6832.8
932.58	7001.63	6777.04	5959.5	5959.5	6777.04
932.48	6773.56	6719.04	5957.6	5957.6	6719.04
932.38	6821.05	6659.88	5955.88	5955.88	6659.88
932.28	6561.12	6600.47	5954.34	5954.34	6600.47
932.18	6465.17	6541.74	5953.04	5953.04	6541.74
932.08	6365.04	6484.33	5951.89	5951.89	6484.33
931.98	6418.04	6428.98	5950.94	5950.94	6428.98
931.88	6315.44	6376.11	5950.05	5950.05	6376.11
931.78	6412.39	6326.23	5949.27	5949.27	6326.23
931.68	6168.12	6279.64	5948.56	5948.56	6279.64
931.58	6201.6	6236.62	5947.96	5947.96	6236.62
931.48	6136.73	6197.27	5947.43	5947.43	6197.27
931.38	6131.26	6161.7	5947.05	5947.05	6161.7
931.28	6053.03	6129.8	5946.73	5946.73	6129.8
931.18	6015.21	6101.47	5946.47	5946.47	6101.47
931.08	6044.99	6076.47	5946.19	5946.19	6076.47
930.98	6170.18	6054.66	5945.97	5945.97	6054.66
930.88	6004.58	6035.75	5945.72	5945.72	6035.75
930.78	6106.59	6019.56	5945.54	5945.54	6019.56
930.68	5857.81	6005.78	5945.37	5945.37	6005.78
930.58	5999.3	5994.18	5945.24	5945.24	5994.18
930.48	6094.31	5984.45	5945.09	5945.09	5984.45
930.38	6040.87	5976.44	5945.01	5945.01	5976.44
930.28	5918.09	5969.77	5944.86	5944.86	5969.77
930.18	6058.9	5964.31	5944.71	5944.71	5964.31
930.08	5983.86	5959.94	5944.63	5944.63	5959.94
929.98	5919.9	5956.46	5944.59	5944.59	5956.46
929.88	5937.23	5953.69	5944.56	5944.56	5953.69
929.78	5907.13	5951.52	5944.54	5944.54	5951.52
929.68	6025.48	5949.81	5944.51	5944.51	5949.81
929.58	5994.93	5948.42	5944.43	5944.43	5948.42
929.48	6053.71	5947.32	5944.34	5944.34	5947.32
929.38	5978.41	5946.49	5944.28	5944.28	5946.49
929.28	5824.2	5945.86	5944.23	5944.23	5945.86
929.18	5986.57	5945.37	5944.18	5944.18	5945.37
929.08	6006.2	5944.93	5944.06	5944.06	5944.93
928.98	6205.49	5944.56	5943.94	5943.94	5944.56
928.88	6010.72	5944.22	5943.77	5943.77	5944.22
928.78	5921.54	5943.95	5943.64	5943.64	5943.95
928.68	5911.72	5943.72	5943.5	5943.5	5943.72
928.58	6019.57	5943.62	5943.47	5943.47	5943.62
928.48	5930.07	5944	5943.89	5943.89	5944
928.38	5934.43	5944.4	5944.32	5944.32	5944.4
928.28	5997.45	5944.8	5944.75	5944.75	5944.8
928.18	5884.06	5945.21	5945.18	5945.18	5945.21
928.08	6016.44	5945.63	5945.6	5945.6	5945.63
927.98	5980.87	5946.05	5946.03	5946.03	5946.05
927.88	5946.37	5946.47	5946.46	5946.46	5946.47
927.78	6054.69	5946.89	5946.88	5946.88	5946.89
927.68	6097.43	5947.32	5947.31	5947.31	5947.32
927.58	6042.33	5947.74	5947.74	5947.74	5947.74
927.48	6115.11	5948.17	5948.17	5948.17	5948.17
927.38	5963.67	5948.59	5948.59	5948.59	5948.59
927.28	6040.18	5949.02	5949.02	5949.02	5949.02
927.18	5999.9	5949.45	5949.45	5949.45	5949.45
927.08	5862.93	5949.88	5949.88	5949.88	5949.88
926.98	6095.75	5950.3	5950.3	5950.3	5950.3
926.88	5955.16	5950.73	5950.73	5950.73	5950.73
926.78	5986.74	5951.16	5951.16	5951.16	5951.16
926.68	6028.19	5951.58	5951.58	5951.58	5951.58
926.58	5918.03	5961.43	5961.43	5961.43	5961.43
926.48	5869.81	5971.27	5971.27	5971.27	5971.27
926.38	6078.57	5981.12	5981.12	5981.12	5981.12
926.28	5987.05	5990.96	5990.96	5990.96	5990.96
926.18	5981.76	6000.8	6000.8	6000.8	6000.8
926.08	6058.89	6010.65	6010.65	6010.65	6010.65
925.98	6020.8	6020.49	6020.49	6020.49	6020.49
925.88	6209.17	6030.33	6030.33	6030.33	6030.33
925.78	6019.28	6040.18	6040.18	6040.18	6040.18
925.68	6047.98	6050.02	6050.02	6050.02	6050.02
925.58	5988.77	6059.87	6059.87	6059.87	6059.87

## Sheet: Fig. 2f
8879	0.01163	-0.000229959	-0.000632249
8883.28	0.00894	-0.000242006	-0.000335349
8887.65	0.00637	-0.000327374	-0.00036318
8892.12	0.00871	-0.000352943	-0.000656952
8896.67	0.00177	-0.000357864	-0.00071502
8901.33	-0.0034	-0.000369265	-0.000877822
8906.07	-0.01246	-0.000388195	-0.000578175
8910.92	-0.0177	-0.000375465	-0.000153821
8915.86	-0.00519	-0.00031225	0.000139527
8920.9	0.00176	-0.000246109	0.00136
8926.03	-0.000745403	-0.000155904	0.00306
8931.27	-0.00547	-9.68063e-06	0.000268322
8936.61	-0.00591	0.00028796	0.000946374
8942.06	-0.00747	0.000528695	0.00178
8947.6	-0.00892	0.000861435	0.0028
8953.26	-0.00847	0.00145	0.00395
8959.02	-0.00651	0.00235	0.00511
8959.48	-0.00348	0.00246	0.00558
8959.95	-0.000950219	0.00258	0.00576
8960.42	-0.00275	0.0027	0.00565
8960.89	-0.00070933	0.00282	0.00582
8961.36	-0.000292461	0.00294	0.00605
8961.83	-0.000597843	0.00305	0.00666
8962.3	-0.00379	0.00317	0.00664
8962.77	0.01067	0.00329	0.00622
8963.24	0.01198	0.00341	0.0064
8963.72	0.00442	0.00354	0.00671
8964.19	-0.00171	0.00371	0.00689
8964.67	-0.000338113	0.00388	0.00691
8965.14	0.00378	0.00402	0.00722
8965.62	0.00249	0.00417	0.00756
8966.09	0.00449	0.00432	0.00744
8966.57	0.00553	0.00449	0.00785
8967.05	0.01432	0.00472	0.00795
8967.53	0.02003	0.00496	0.00812
8968.01	0.0209	0.00522	0.00861
8968.49	0.01754	0.00545	0.00929
8968.97	0.02016	0.00568	0.00972
8969.45	0.02851	0.00596	0.00947
8969.93	0.01974	0.00625	0.00976
8970.42	0.02833	0.00666	0.00983
8970.9	0.03682	0.00707	0.01007
8971.38	0.03123	0.00743	0.01086
8971.87	0.04473	0.00775	0.01087
8972.36	0.04598	0.00805	0.01111
8972.84	0.04639	0.00838	0.01154
8973.33	0.05199	0.0088	0.01218
8973.82	0.04626	0.00935	0.01251
8974.31	0.04703	0.01	0.01281
8974.8	0.04804	0.01068	0.01322
8975.29	0.0547	0.01141	0.01387
8975.78	0.04821	0.01214	0.01445
8976.27	0.03118	0.01291	0.01508
8976.76	0.02713	0.01386	0.01575
8977.26	0.02564	0.01522	0.01652
8977.75	0.03488	0.0168	0.01738
8978.24	0.05154	0.01832	0.01806
8978.74	0.04993	0.01969	0.01929
8979.24	0.04933	0.0213	0.02059
8979.73	0.05316	0.02316	0.02133
8980.23	0.05307	0.0255	0.02217
8980.73	0.0533	0.02914	0.02353
8981.23	0.05405	0.03419	0.02491
8981.73	0.06008	0.04081	0.02631
8982.23	0.06298	0.04942	0.02824
8982.73	0.07167	0.06072	0.03226
8983.23	0.08671	0.07725	0.0376
8983.73	0.08604	0.10809	0.04392
8984.24	0.07798	0.18005	0.04983
8984.74	0.08604	0.29074	0.05339
8985.25	0.08741	0.37393	0.05483
8985.75	0.08938	0.41505	0.05713
8986.26	0.06363	0.4392	0.06448
8986.77	0.06236	0.45338	0.07721
8987.27	0.07364	0.45837	0.0912
8987.78	0.07646	0.45098	0.10831
8988.29	0.09832	0.43755	0.13113
8988.8	0.12711	0.43119	0.1566
8989.31	0.16489	0.43721	0.1976
8989.83	0.2008	0.45192	0.26026
8990.34	0.25675	0.47044	0.34871
8990.85	0.32195	0.49351	0.43668
8991.36	0.3797	0.51695	0.48918
8991.88	0.44592	0.53904	0.51686
8992.39	0.50799	0.55734	0.52383
8992.91	0.57387	0.57527	0.52047
8993.43	0.65319	0.5947	0.51675
8993.95	0.70803	0.61836	0.52592
8994.46	0.77424	0.65432	0.55576
8994.98	0.85862	0.70127	0.6036
8995.5	0.93921	0.75274	0.65095
8996.02	1.03448	0.80152	0.70759
8996.54	1.12371	0.84403	0.75375
8997.07	1.2209	0.88139	0.81623
8997.59	1.3005	0.91852	0.86912
8998.11	1.36529	0.95595	0.95046
8998.64	1.43722	0.97814	1.0008
8999.16	1.47305	0.98202	1.02576
8999.69	1.52247	0.9789	1.04811
9000.22	1.54009	0.97204	1.0677
9000.74	1.54788	0.96164	1.08715
9001.27	1.54977	0.94723	1.10545
9001.8	1.54335	0.92698	1.13056
9002.33	1.53815	0.90848	1.16035
9002.86	1.5167	0.89433	1.18888
9003.39	1.50344	0.88575	1.20725
9003.92	1.47615	0.88221	1.21443
9005.73	1.37804	0.92194	1.18584
9007.54	1.3034	0.97988	1.1225
9009.36	1.21468	0.99507	1.04595
9011.19	1.16882	0.94241	0.99821
9013.03	1.13421	0.89693	0.96436
9014.88	1.10681	0.87333	0.95339
9016.74	1.07443	0.85324	0.96605
9018.61	1.04214	0.85831	0.96883
9020.48	1.01496	0.87342	0.96519
9022.37	0.98879	0.89331	0.95699
9024.26	0.96814	0.92771	0.94781
9026.17	0.94705	0.95983	0.92231
9028.08	0.93465	0.98586	0.89528
9030	0.92967	1.0079	0.87035
9031.93	0.92749	1.01169	0.86043
9033.87	0.93901	0.98665	0.85363
9035.82	0.94623	0.96251	0.86534
9037.78	0.97127	0.93105	0.88688
9039.75	1.00074	0.91364	0.90987
9041.73	1.02674	0.90714	0.93413
9043.72	1.06115	0.90985	0.96021
9045.71	1.07201	0.91931	0.98604
9047.72	1.09183	0.92734	1.00403
9049.74	1.11132	0.92715	1.0194
9051.77	1.11806	0.92596	1.02892
9053.8	1.12312	0.93348	1.03895
9055.85	1.12464	0.94481	1.04636
9057.9	1.12689	0.94945	1.04527
9059.97	1.1202	0.95077	1.03906
9062.04	1.11868	0.95815	1.0309
9064.13	1.11307	0.96855	1.02267
9066.23	1.11477	0.98269	1.01581
9068.33	1.10821	0.99224	1.00793
9070.45	1.09337	1.00016	1.00377
9072.57	1.07201	1.01066	0.99773
9074.71	1.05866	1.02404	0.99447
9076.86	1.04473	1.03486	0.99018
9079.01	1.0309	1.03573	0.98793
9081.18	1.02856	1.02548	0.98285
9083.36	1.01558	1.00613	0.98142
9085.55	0.99047	0.99136	0.98028
9087.74	0.9828	0.97443	0.97951
9089.95	0.97671	0.96005	0.97871
9092.17	0.97178	0.95256	0.97527
9094.4	0.97888	0.94819	0.97581
9096.64	0.97977	0.94042	0.97429
9098.89	0.99076	0.92835	0.97391
9101.16	0.98084	0.91466	0.97414
9103.43	0.98328	0.90707	0.97457
9105.71	1.00475	0.9092	0.97439
9108.01	0.9925	0.91898	0.97516
9110.31	0.99388	0.93477	0.97579
9112.63	0.98795	0.95139	0.97369
9114.96	0.9911	0.96424	0.97836
9117.3	0.99072	0.97443	0.97692
9119.65	1.00255	0.97922	0.97726
9122.01	1.01023	0.9802	0.97843
9124.38	1.00874	0.98131	0.98063
9126.77	1.01566	0.98846	0.98217
9129.16	1.01445	1.0029	0.98752
9131.57	1.01439	1.02803	0.99571
9133.99	1.01941	1.05256	1.00217
9136.42	1.01206	1.06389	1.00793
9138.86	1.01626	1.0658	1.01332
9141.32	1.00932	1.06182	1.0142
9143.78	1.0046	1.05465	1.0143
9146.26	1.0076	1.04394	1.01635
9148.75	1.01537	1.02796	1.01824
9151.25	1.00115	1.00962	1.01537
9153.77	0.9997	0.9863	1.01454
9156.29	0.99185	0.96411	1.01445
9158.83	0.98824	0.9424	1.01126
9161.38	0.98397	0.92154	1.01129
9163.94	0.98657	0.9129	1.01071
9166.52	0.9807	0.91408	1.00661
9169.11	0.9856	0.92751	1.00267
9171.71	0.99045	0.9455	0.99892
9174.32	0.98638	0.96768	0.99244
9176.94	0.98967	0.98429	0.98633
9179.58	0.99263	0.99476	0.9852
9182.23	0.98668	0.99992	0.98166
9184.89	0.99165	1.00013	0.98336
9187.57	0.99723	0.99848	0.98797
9190.26	1.00394	0.99724	0.99106
9192.96	0.99704	0.99725	0.99626
9195.68	1.00059	0.99706	0.99759
9198.41	0.99756	0.99511	0.99624
9201.15	1.00404	0.99308	0.99769
9203.9	1.0002	0.99402	0.99585
9206.67	1.00298	1.00354	0.99479
9209.46	1.00422	1.01726	0.993
9212.25	0.99918	1.03107	0.98953
9215.06	0.99933	1.03774	0.98971
9217.89	1.02355	1.03959	0.99022
9220.72	1.02203	1.03806	0.99024
9223.57	1.02162	1.03431	0.996
9226.44	1.00524	1.02656	0.99892
9229.32	1.01631	1.01621	1.00132
9232.21	1.00606	1.00301	1.00452
9235.12	1.0128	0.99003	1.00161
9238.04	1.01271	0.97979	1.00304
9240.98	1.00678	0.97109	0.99742
9243.93	1.01045	0.96765	0.99875
9246.9	1.0088	0.96834	1.00088
9249.88	1.01328	0.97174	0.99562
9252.87	1.00965	0.97461	0.99986
9255.88	1.00222	0.97646	0.99857
9258.91	0.99403	0.97844	1.00012
9261.95	0.99614	0.98092	1.0023
9265	0.99545	0.98374	1.00311
9268.07	0.99664	0.98731	1.00471
9271.16	1.00854	0.99218	1.00303
9274.26	1.02997	0.99652	1.00218
9277.38	1.01321	1.00098	1.0016
9280.51	1.00796	1.00444	0.99691
9283.66	1.01472	1.00725	0.99595
9286.82	1.00085	1.00991	0.99506
9290	1.00521	1.01236	0.99706
9293.2	1.02622	1.01488	0.99737
9296.41	1.01902	1.01708	0.99827
9299.64	1.00146	1.01922	0.9983
9302.89	0.99309	1.02039	0.99905
9306.15	0.98249	1.01954	0.99804
9309.43	0.98788	1.01662	0.9973
9312.72	0.99052	1.01276	0.99569
9316.03	0.99376	1.00795	0.99614
9319.36	0.99176	1.00398	0.9961
9322.71	0.99549	0.99998	0.99404
9326.07	1.01656	0.99795	0.99551
9329.45	0.99552	0.99743	0.99562
9332.85	0.9947	0.99793	0.9945
9336.27	0.99742	0.99785	0.99789
9339.7	0.99662	0.99623	0.99738
9343.15	0.99467	0.99295	0.99795
9346.62	0.99723	0.98887	0.99904
9350.11	0.99625	0.98779	0.99775
9353.61	0.99325	0.98934	0.99539
9357.13	0.9933	0.99155	0.99344
9360.68	1.01995	0.99307	0.99668
9364.24	0.99247	0.99474	0.99502
9367.82	0.98117	0.99683	0.99573
9371.41	0.96713	0.99884	0.99985
9375.03	0.97956	1.00092	1.00218
9378.67	0.9794	1.00296	1.00336
9382.32	0.98951	1.00492	1.00373
9386	0.99154	1.00682	1.00545
9389.69	0.98809	1.00853	1.00542
9393.41	0.98325	1.00985	1.00346
9397.14	0.99184	1.01101	1.00374
9400.89	0.98852	1.01197	1.0042
9404.67	1.003	1.01218	1.0007
9408.46	0.99647	1.01154	1.00159
9412.28	0.99678	1.01019	1.00231
9416.11	0.99891	1.00796	1.0005
9419.97	0.99954	1.00521	1.00307
9423.84	1.00144	1.00318	1.002
9427.74	0.99535	1.002	1.00182
9431.66	1.00256	1.00166	1.00072
9435.6	1.00282	1.00195	0.99921
9439.56	0.99558	1.00227	0.99575
9443.55	0.99924	1.00235	0.99482
9447.56	0.99858	1.00192	0.99479
9451.58	0.99625	1.0011	0.99451
9455.63	1.02492	0.99984	0.99509
9459.71	1.00527	0.99878	0.99496
9463.8	1.00281	0.99835	0.99665
9467.92	1.01063	0.99845	0.99874
9472.06	1.00961	0.99848	1.00045
9476.23	1.01555	0.99841	1.00095
9480.42	1.01636	0.99859	1.00181
9484.63	1.0194	0.99922	1.00244
9488.87	1.02162	1.0002	1.00243
9493.13	1.02487	1.00152	1.00174
9497.41	1.02739	1.00292	1.00084
9501.72	1.03039	1.00429	1.00005
9506.05	1.05407	1.00561	1.00174
9510.41	1.03611	1.00682	1.00087
9514.8	1.0478	1.00749	0.99851
9519.2	1.05118	1.00759	0.99901
9523.64	1.04982	1.00684	1.00095
9528.1	1.04753	1.00549	1.0009
9532.59	1.05402	1.00388	1.00154
9537.1	1.06461	1.00249	1.00013
9541.64	1.06193	1.00171	0.99915
9546.2	1.07524	1.00099	1.00103
9550.8	1.07328	1.00065	0.99824
9555.42	1.07957	1.00026	1.00023
9560.07	1.10876	1.00008	0.99921
9564.74	1.09306	0.99988	1.00043
9569.44	1.10025	0.99949	1.00073
9574.18	1.10082	0.99923	1.00195
9578.94	1.11536	0.99881	1.00353

## Sheet: Fig. 2g
0	0.39693	0.10026	0.35084
0.03068	0.39934	0.13291	0.34147
0.06136	0.40574	0.19893	0.31427
0.09204	0.41394	0.27039	0.27214
0.12272	0.42092	0.33787	0.22093
0.1534	0.42343	0.39704	0.17232
0.18408	0.41839	0.44511	0.14871
0.21476	0.40322	0.48002	0.16966
0.24544	0.37591	0.5003	0.22109
0.27612	0.33526	0.50493	0.27933
0.3068	0.28115	0.49343	0.33045
0.33748	0.21568	0.46584	0.36669
0.36816	0.14828	0.42279	0.38354
0.39884	0.11863	0.36564	0.37915
0.42951	0.17944	0.29687	0.35468
0.46019	0.29283	0.2214	0.31552
0.49087	0.42791	0.15228	0.27382
0.52155	0.57504	0.12852	0.25112
0.55223	0.72934	0.18212	0.26896
0.58291	0.887	0.27373	0.32491
0.61359	1.04446	0.3752	0.39709
0.64427	1.19822	0.47614	0.46474
0.67495	1.34485	0.57089	0.51297
0.70563	1.48103	0.65516	0.53178
0.73631	1.60364	0.72528	0.51647
0.76699	1.70987	0.77794	0.47099
0.79767	1.79732	0.81027	0.41754
0.82835	1.86413	0.81985	0.41208
0.85903	1.90915	0.80486	0.51676
0.88971	1.93214	0.76434	0.72552
0.92039	1.93395	0.69862	0.99702
0.95107	1.91685	0.61046	1.29841
0.98175	1.88486	0.50801	1.60461
1.01243	1.84416	0.41332	1.89379
1.04311	1.8034	0.37814	2.14625
1.07379	1.77377	0.45907	2.34522
1.10447	1.76826	0.64225	2.47855
1.13515	1.79977	0.88687	2.54141
1.16583	1.8783	1.16986	2.54016
1.19651	2.00833	1.47954	2.49763
1.22718	2.18822	1.80845	2.45893
1.25786	2.41157	2.15068	2.49166
1.28854	2.66945	2.50086	2.6678
1.31922	2.95222	2.8538	3.02753
1.3499	3.25049	3.20444	3.5602
1.38058	3.55556	3.54774	4.22109
1.41126	3.85951	3.87879	4.95572
1.44194	4.15517	4.19285	5.7117
1.47262	4.43607	4.48537	6.44158
1.5033	4.69642	4.75211	7.1032
1.53398	4.93108	4.98918	7.65978
1.56466	5.13557	5.19311	8.08046
1.59534	5.30606	5.36088	8.34091
1.62602	5.43942	5.49002	8.4241
1.6567	5.53321	5.57862	8.32085
1.68738	5.5857	5.62534	8.03019
1.71806	5.59587	5.62946	7.55939
1.74874	5.56343	5.59091	6.92374
1.77942	5.48879	5.5102	6.14595
1.8101	5.37304	5.38849	5.2554
1.84078	5.21793	5.22751	4.28723
1.87146	5.02582	5.02955	3.28195
1.90214	4.79964	4.79741	2.28735
1.93282	4.54281	4.53438	1.37322
1.9635	4.25922	4.24416	0.7397
1.99418	3.95312	3.93078	0.88311
2.02485	3.62903	3.59859	1.41099
2.05553	3.29174	3.25215	1.88284
2.08621	2.94615	2.89621	2.20896
2.11689	2.59728	2.53562	2.36602
2.14757	2.25018	2.17536	2.35166
2.17825	1.90996	1.82052	2.17851
2.20893	1.58185	1.47652	1.87712
2.23961	1.27148	1.14961	1.51058
2.27029	0.98559	0.84839	1.21885
2.30097	0.73388	0.58888	1.24322
2.33165	0.53377	0.41017	1.65241
2.36233	0.41715	0.38173	2.25961
2.39301	0.41113	0.48906	2.91758
2.42369	0.4845	0.63982	3.54744
2.45437	0.5826	0.78728	4.09974
2.48505	0.67547	0.91571	4.5392
2.51573	0.7511	1.01942	4.8402
2.54641	0.80509	1.09636	4.98549
2.57709	0.83627	1.14619	4.96595
2.60777	0.84516	1.16953	4.78035
2.63845	0.83321	1.16769	4.43518
2.66913	0.80251	1.14245	3.94412
2.69981	0.75557	1.096	3.32737
2.73049	0.69522	1.03082	2.6109
2.76117	0.62447	0.94966	1.82595
2.79185	0.54647	0.85544	1.01223
2.82252	0.46444	0.75125	0.30291
2.8532	0.38161	0.64033	0.71983
2.88388	0.30128	0.52616	1.44225
2.91456	0.22692	0.41276	2.09663
2.94524	0.16267	0.3056	2.64543
2.97592	0.11428	0.21469	3.06894
3.0066	0.08925	0.16237	3.35618
3.03728	0.08777	0.17393	3.50425
3.06796	0.09586	0.22911	3.51846
3.09864	0.10089	0.29515	3.41237
3.12932	0.09792	0.35777	3.20777
3.16	0.0875	0.4116	2.93465
3.19068	0.0771	0.45434	2.63091
3.22136	0.08469	0.48496	2.34115
3.25204	0.12215	0.50317	2.11143
3.28272	0.1823	0.50911	1.97587
3.3134	0.25722	0.50328	1.93828
3.34408	0.34246	0.48649	1.96729
3.37476	0.43504	0.45975	2.01413
3.40544	0.53244	0.42428	2.0341
3.43612	0.63234	0.38145	1.99613
3.4668	0.73249	0.33277	1.88347
3.49748	0.83074	0.27988	1.69126
3.52816	0.92503	0.22458	1.42407
3.55884	1.01344	0.16905	1.09368
3.58952	1.0942	0.11667	0.71733
3.62019	1.16574	0.07551	0.31814
3.65087	1.22671	0.06626	0.12705
3.68155	1.276	0.09329	0.50049
3.71223	1.31274	0.1315	0.85542
3.74291	1.33636	0.16909	1.15884
3.77359	1.34652	0.20246	1.39649
3.80427	1.34317	0.23015	1.55951
3.83495	1.32655	0.25145	1.64411
3.86563	1.2971	0.26605	1.65154
3.89631	1.25557	0.2739	1.58786
3.92699	1.20287	0.27513	1.46339
3.95767	1.14017	0.27007	1.29208
3.98835	1.0688	0.25918	1.09089
4.01903	0.99027	0.24305	0.87925
4.04971	0.90624	0.22237	0.67905
4.08039	0.81853	0.19793	0.51496
4.11107	0.72914	0.1706	0.41078
4.14175	0.6403	0.14133	0.37105
4.17243	0.55453	0.11124	0.36507
4.20311	0.47487	0.08182	0.35276
4.23379	0.40506	0.0558	0.31019
4.26447	0.34963	0.04012	0.22983
4.29515	0.31331	0.04447	0.12195
4.32583	0.29888	0.06225	0.11012
4.35651	0.30464	0.08284	0.27187
4.38719	0.32478	0.10226	0.46901
4.41786	0.35254	0.11907	0.67386
4.44854	0.38261	0.13265	0.87299
4.47922	0.41154	0.14268	1.05575
4.5099	0.43738	0.14905	1.21386
4.54058	0.4592	0.15179	1.34185
4.57126	0.47676	0.15102	1.43743
4.60194	0.49032	0.14698	1.50181
4.63262	0.50051	0.13995	1.53955
4.6633	0.50823	0.1303	1.55806
4.69398	0.51452	0.11844	1.56643
4.72466	0.52053	0.10484	1.57352
4.75534	0.52735	0.08999	1.58575
4.78602	0.53595	0.07444	1.60511
4.8167	0.54706	0.05882	1.62845
4.84738	0.56107	0.04398	1.64824
4.87806	0.57804	0.03139	1.65452
4.90874	0.59769	0.02411	1.63694
4.93942	0.61946	0.02541	1.58648
4.9701	0.64263	0.03273	1.49643
5.00078	0.66633	0.04164	1.36296
5.03146	0.6897	0.05008	1.18518
5.06214	0.71189	0.05722	0.96501
5.09282	0.73209	0.06274	0.70683
5.1235	0.74962	0.06649	0.41722
5.15418	0.76389	0.06846	0.10879
5.18486	0.77439	0.06868	0.23481
5.21553	0.78077	0.06728	0.57112
5.24621	0.78274	0.0644	0.90854
5.27689	0.78014	0.06022	1.23817
5.30757	0.77289	0.05496	1.55337
5.33825	0.761	0.04885	1.8488
5.36893	0.74456	0.04214	2.12041
5.39961	0.7237	0.03506	2.36535
5.43029	0.69862	0.02791	2.58178
5.46097	0.66958	0.02099	2.76875
5.49165	0.63686	0.01474	2.9259
5.52233	0.60075	0.01009	3.05335
5.55301	0.56157	0.00878	3.15149
5.58369	0.51965	0.01099	3.22089
5.61437	0.47532	0.01442	3.26219
5.64505	0.42888	0.01774	3.27612
5.67573	0.38064	0.02047	3.26343
5.70641	0.33088	0.02248	3.22489
5.73709	0.27987	0.02371	3.16135
5.76777	0.22788	0.02417	3.07371
5.79845	0.17515	0.02391	2.96297
5.82913	0.122	0.02301	2.83031
5.85981	0.0691	0.02155	2.67716
5.89049	0.02228	0.01964	2.50529
5.92117	0.04615	0.01739	2.31692
5.95185	0.09842	0.01491	2.11473
5.98253	0.15203	0.01232	1.90199
6.0132	0.20562	0.00975	1.68244
6.04388	0.25883	0.00734	1.46032
6.07456	0.3114	0.00525	1.24014
6.10524	0.36309	0.00381	1.02659
6.13592	0.41366	0.00341	0.82435
6.1666	0.46286	0.00393	0.63796
6.19728	0.51042	0.00475	0.47192
6.22796	0.55605	0.0055	0.33124
6.25864	0.59944	0.00604	0.22344
6.28932	0.64029	0.00633	0.16183
6.32	0.67828	0.0064	0.1546
6.35068	0.7131	0.00627	0.17854
6.38136	0.74446	0.00602	0.20622
6.41204	0.77206	0.00571	0.22687
6.44272	0.79565	0.00542	0.23827
6.4734	0.81499	0.00519	0.24106
6.50408	0.82991	0.00507	0.23674
6.53476	0.84027	0.00505	0.22694
6.56544	0.846	0.00508	0.21322
6.59612	0.84708	0.00509	0.1972
6.6268	0.8436	0.00503	0.18071
6.65748	0.8357	0.00485	0.166
6.68816	0.82363	0.00451	0.15556
6.71884	0.80776	0.00402	0.15135
6.74952	0.78854	0.00341	0.1537
6.7802	0.76657	0.00279	0.16085
6.81087	0.74255	0.00243	0.16978
6.84155	0.71734	0.00268	0.17751
6.87223	0.69189	0.00358	0.1818
6.90291	0.66727	0.00484	0.18146
6.93359	0.64462	0.00627	0.1765
6.96427	0.62507	0.00774	0.16822
6.99495	0.60968	0.00919	0.15928
7.02563	0.59929	0.01054	0.1535
7.05631	0.59442	0.01174	0.15478
7.08699	0.59516	0.01276	0.16498
7.11767	0.6012	0.01354	0.18287
7.14835	0.6118	0.01407	0.2052
7.17903	0.62593	0.01431	0.22847
7.20971	0.64241	0.01427	0.24986
7.24039	0.65999	0.01392	0.2674
7.27107	0.67745	0.0133	0.27992
7.30175	0.69368	0.0124	0.28689
7.33243	0.70769	0.01126	0.28831
7.36311	0.71865	0.00993	0.28455
7.39379	0.72588	0.00846	0.27617
7.42447	0.72882	0.00695	0.26382
7.45515	0.7271	0.00556	0.24811
7.48583	0.72046	0.00458	0.22956
7.51651	0.70878	0.00439	0.20859
7.54719	0.69207	0.0051	0.18552
7.57787	0.67044	0.00635	0.16074
7.60854	0.64414	0.00781	0.13476
7.63922	0.61352	0.00927	0.10845
7.6699	0.57901	0.01063	0.08331
7.70058	0.54119	0.01183	0.06238
7.73126	0.50071	0.01281	0.0513
7.76194	0.45836	0.01356	0.0548
7.79262	0.41508	0.01405	0.06844
7.8233	0.37199	0.01429	0.08519
7.85398	0.33044	0.01427	0.10147
7.88466	0.29217	0.014	0.11601
7.91534	0.25928	0.01349	0.12867
7.94602	0.23423	0.01277	0.13994
7.9767	0.21935	0.01187	0.15062
8.00738	0.2158	0.01081	0.16156
8.03806	0.2228	0.00962	0.17331
8.06874	0.23788	0.00834	0.18594
8.09942	0.25797	0.00701	0.19898
8.1301	0.2804	0.00565	0.21147
8.16078	0.30312	0.0043	0.22221
8.19146	0.32471	0.00301	0.22991
8.22214	0.34418	0.00183	0.23335
8.25282	0.36087	0.000918028	0.23154
8.2835	0.37434	0.000975862	0.22379
8.31418	0.38431	0.00171	0.20971
8.34486	0.39064	0.00245	0.18932
8.37554	0.39325	0.00308	0.16305
8.40621	0.39217	0.00358	0.13182
8.43689	0.38744	0.00395	0.09754
8.46757	0.37919	0.00418	0.06509
8.49825	0.36754	0.00429	0.05074
8.52893	0.35266	0.00429	0.07229
8.55961	0.33472	0.00418	0.11175
8.59029	0.31392	0.004	0.15573
8.62097	0.29046	0.00374	0.2001
8.65165	0.26454	0.00345	0.24311
8.68233	0.2364	0.00312	0.28376
8.71301	0.20627	0.00279	0.3214
8.74369	0.17446	0.00248	0.35564
8.77437	0.14139	0.00219	0.38632
8.80505	0.10774	0.00196	0.41343
8.83573	0.07524	0.00179	0.43713
8.86641	0.04967	0.0017	0.45769
8.89709	0.04792	0.00166	0.47555
8.92777	0.07321	0.00168	0.49118
8.95845	0.10862	0.00172	0.50515
8.98913	0.14726	0.00178	0.51799
9.01981	0.1871	0.00183	0.53015
9.05049	0.22731	0.00187	0.54192
9.08117	0.26738	0.00189	0.55338
9.11185	0.30693	0.00189	0.5643
9.14253	0.34562	0.00187	0.5742
9.17321	0.38313	0.00183	0.58234
9.20388	0.41918	0.00176	0.58783
9.23456	0.45347	0.00166	0.58968
9.26524	0.48574	0.00154	0.58697
9.29592	0.51572	0.0014	0.57887
9.3266	0.54318	0.00124	0.56479
9.35728	0.56789	0.00106	0.54444
9.38796	0.58966	0.000874226	0.51783
9.41864	0.60832	0.000689045	0.48536
9.44932	0.62372	0.000523714	0.4478
9.48	0.63575	0.000414137	0.40632
9.51068	0.64434	0.000406002	0.36243
9.54136	0.64943	0.00049248	0.31807
9.57204	0.65102	0.000620499	0.27549
9.60272	0.64914	0.00075422	0.23731
9.6334	0.64385	0.000878734	0.20622
9.66408	0.63526	0.000990374	0.18441
9.69476	0.6235	0.00109	0.17249
9.72544	0.60876	0.0012	0.16873
9.75612	0.59123	0.00131	0.16972
9.7868	0.57119	0.00146	0.17191
9.81748	0.54889	0.00166	0.17275
9.84816	0.52467	0.0019	0.17086
9.87884	0.49887	0.0022	0.166
9.90952	0.47186	0.00255	0.15878
9.9402	0.44407	0.00293	0.15057
9.97088	0.41593	0.00333	0.14332

## Sheet: Fig. 2h
CuO
0.01383	0.01384	0.01384	0.01384	0.01385	0.01385	0.01385	0.01386	0.01386	0.01386	0.01387	0.01387	0.01387	0.01387	0.01388	0.01388	0.01388	0.01389	0.01389	0.01389	0.0139	0.0139	0.0139	0.01391	0.01391	0.01391	0.01391	0.01392	0.01392	0.01392	0.01393	0.01393	0.01393	0.01394	0.01394	0.01394	0.01394	0.01395	0.01395	0.01395	0.01396	0.01396	0.01396	0.01396	0.01397	0.01397	0.01397	0.01397	0.01398	0.01398
0.01565	0.01566	0.01566	0.01567	0.01568	0.01568	0.01569	0.0157	0.0157	0.01571	0.01572	0.01572	0.01573	0.01574	0.01574	0.01575	0.01576	0.01576	0.01577	0.01577	0.01578	0.01579	0.01579	0.0158	0.01581	0.01581	0.01582	0.01582	0.01583	0.01584	0.01584	0.01585	0.01585	0.01586	0.01587	0.01587	0.01588	0.01588	0.01589	0.01589	0.0159	0.01591	0.01591	0.01592	0.01592	0.01593	0.01593	0.01594	0.01595	0.01595
0.01795	0.01796	0.01797	0.01799	0.018	0.01801	0.01802	0.01804	0.01805	0.01806	0.01808	0.01809	0.0181	0.01811	0.01812	0.01814	0.01815	0.01816	0.01817	0.01819	0.0182	0.01821	0.01822	0.01823	0.01825	0.01826	0.01827	0.01828	0.01829	0.01831	0.01832	0.01833	0.01834	0.01835	0.01836	0.01837	0.01839	0.0184	0.01841	0.01842	0.01843	0.01844	0.01845	0.01846	0.01848	0.01849	0.0185	0.01851	0.01852	0.01853
0.01988	0.0199	0.01992	0.01994	0.01997	0.01999	0.02001	0.02003	0.02005	0.02007	0.02009	0.02011	0.02013	0.02016	0.02018	0.0202	0.02022	0.02024	0.02026	0.02028	0.0203	0.02032	0.02034	0.02036	0.02038	0.0204	0.02042	0.02044	0.02046	0.02048	0.0205	0.02052	0.02054	0.02056	0.02058	0.0206	0.02062	0.02064	0.02066	0.02068	0.0207	0.02072	0.02073	0.02075	0.02077	0.02079	0.02081	0.02083	0.02085	0.02087
0.02075	0.02078	0.02081	0.02084	0.02087	0.0209	0.02093	0.02096	0.02099	0.02102	0.02105	0.02108	0.02111	0.02114	0.02117	0.0212	0.02123	0.02126	0.02129	0.02132	0.02135	0.02138	0.02141	0.02144	0.02147	0.0215	0.02153	0.02155	0.02158	0.02161	0.02164	0.02167	0.0217	0.02173	0.02176	0.02178	0.02181	0.02184	0.02187	0.0219	0.02192	0.02195	0.02198	0.02201	0.02204	0.02206	0.02209	0.02212	0.02215	0.02217
0.0206	0.02064	0.02068	0.02072	0.02076	0.0208	0.02084	0.02087	0.02091	0.02095	0.02099	0.02103	0.02107	0.0211	0.02114	0.02118	0.02122	0.02126	0.02129	0.02133	0.02137	0.02141	0.02144	0.02148	0.02152	0.02155	0.02159	0.02163	0.02167	0.0217	0.02174	0.02178	0.02181	0.02185	0.02188	0.02192	0.02196	0.02199	0.02203	0.02206	0.0221	0.02214	0.02217	0.02221	0.02224	0.02228	0.02231	0.02235	0.02238	0.02242
0.02006	0.02011	0.02016	0.0202	0.02025	0.02029	0.02034	0.02039	0.02043	0.02048	0.02052	0.02057	0.02061	0.02066	0.0207	0.02075	0.0208	0.02084	0.02089	0.02093	0.02097	0.02102	0.02106	0.02111	0.02115	0.0212	0.02124	0.02129	0.02133	0.02137	0.02142	0.02146	0.0215	0.02155	0.02159	0.02164	0.02168	0.02172	0.02176	0.02181	0.02185	0.02189	0.02193	0.02198	0.02202	0.02206	0.0221	0.02215	0.02219	0.02223
0.0197	0.01975	0.01981	0.01986	0.01992	0.01997	0.02003	0.02008	0.02014	0.02019	0.02025	0.0203	0.02036	0.02041	0.02046	0.02052	0.02057	0.02063	0.02068	0.02074	0.02079	0.02084	0.0209	0.02095	0.021	0.02106	0.02111	0.02116	0.02122	0.02127	0.02132	0.02138	0.02143	0.02148	0.02153	0.02159	0.02164	0.02169	0.02174	0.02179	0.02185	0.0219	0.02195	0.022	0.02205	0.0221	0.02215	0.0222	0.02226	0.02231
0.01956	0.01963	0.01969	0.01976	0.01983	0.01989	0.01996	0.02003	0.0201	0.02016	0.02023	0.0203	0.02036	0.02043	0.0205	0.02056	0.02063	0.0207	0.02076	0.02083	0.0209	0.02096	0.02103	0.0211	0.02116	0.02123	0.0213	0.02136	0.02143	0.02149	0.02156	0.02162	0.02169	0.02175	0.02182	0.02188	0.02195	0.02201	0.02208	0.02214	0.02221	0.02227	0.02234	0.0224	0.02247	0.02253	0.02259	0.02266	0.02272	0.02279
0.01933	0.01941	0.01949	0.01957	0.01965	0.01973	0.01981	0.0199	0.01998	0.02006	0.02014	0.02022	0.0203	0.02038	0.02046	0.02054	0.02062	0.02071	0.02079	0.02087	0.02095	0.02103	0.02111	0.02119	0.02127	0.02135	0.02143	0.02151	0.02159	0.02168	0.02176	0.02184	0.02192	0.022	0.02208	0.02216	0.02224	0.02232	0.0224	0.02248	0.02256	0.02264	0.02272	0.0228	0.02288	0.02296	0.02304	0.02312	0.0232	0.02328
0.01876	0.01885	0.01894	0.01904	0.01913	0.01922	0.01932	0.01941	0.0195	0.0196	0.01969	0.01979	0.01988	0.01997	0.02007	0.02016	0.02026	0.02035	0.02045	0.02054	0.02063	0.02073	0.02082	0.02092	0.02101	0.02111	0.0212	0.0213	0.02139	0.02149	0.02158	0.02168	0.02177	0.02187	0.02196	0.02206	0.02215	0.02225	0.02234	0.02244	0.02253	0.02263	0.02272	0.02282	0.02291	0.023	0.0231	0.02319	0.02329	0.02338
0.01786	0.01796	0.01806	0.01817	0.01827	0.01837	0.01847	0.01858	0.01868	0.01879	0.01889	0.01899	0.0191	0.0192	0.01931	0.01941	0.01952	0.01962	0.01973	0.01983	0.01994	0.02004	0.02015	0.02026	0.02036	0.02047	0.02057	0.02068	0.02079	0.02089	0.021	0.02111	0.02122	0.02132	0.02143	0.02154	0.02164	0.02175	0.02186	0.02197	0.02207	0.02218	0.02229	0.0224	0.0225	0.02261	0.02272	0.02283	0.02294	0.02304
0.01679	0.0169	0.01701	0.01712	0.01723	0.01734	0.01745	0.01756	0.01768	0.01779	0.0179	0.01801	0.01813	0.01824	0.01835	0.01847	0.01858	0.01869	0.01881	0.01892	0.01904	0.01915	0.01927	0.01938	0.0195	0.01961	0.01973	0.01985	0.01996	0.02008	0.0202	0.02031	0.02043	0.02055	0.02067	0.02078	0.0209	0.02102	0.02114	0.02126	0.02137	0.02149	0.02161	0.02173	0.02185	0.02197	0.02209	0.02221	0.02233	0.02245
0.01569	0.01581	0.01593	0.01604	0.01616	0.01628	0.0164	0.01652	0.01664	0.01676	0.01688	0.017	0.01712	0.01724	0.01736	0.01748	0.0176	0.01772	0.01785	0.01797	0.01809	0.01822	0.01834	0.01847	0.01859	0.01872	0.01884	0.01897	0.01909	0.01922	0.01935	0.01947	0.0196	0.01973	0.01986	0.01998	0.02011	0.02024	0.02037	0.0205	0.02063	0.02076	0.02089	0.02102	0.02115	0.02128	0.02141	0.02154	0.02167	0.0218
0.01461	0.01473	0.01486	0.01498	0.0151	0.01523	0.01535	0.01548	0.01561	0.01573	0.01586	0.01599	0.01612	0.01624	0.01637	0.0165	0.01663	0.01676	0.0169	0.01703	0.01716	0.01729	0.01743	0.01756	0.01769	0.01783	0.01796	0.0181	0.01823	0.01837	0.01851	0.01864	0.01878	0.01892	0.01906	0.0192	0.01933	0.01947	0.01961	0.01975	0.01989	0.02004	0.02018	0.02032	0.02046	0.0206	0.02074	0.02089	0.02103	0.02117
0.01353	0.01366	0.01378	0.01391	0.01404	0.01417	0.0143	0.01444	0.01457	0.0147	0.01483	0.01497	0.0151	0.01524	0.01538	0.01551	0.01565	0.01579	0.01593	0.01607	0.01621	0.01635	0.01649	0.01663	0.01677	0.01692	0.01706	0.01721	0.01735	0.0175	0.01764	0.01779	0.01794	0.01809	0.01824	0.01838	0.01853	0.01868	0.01884	0.01899	0.01914	0.01929	0.01944	0.0196	0.01975	0.01991	0.02006	0.02022	0.02037	0.02053
0.01244	0.01257	0.0127	0.01283	0.01296	0.0131	0.01323	0.01337	0.01351	0.01364	0.01378	0.01392	0.01406	0.0142	0.01435	0.01449	0.01463	0.01478	0.01492	0.01507	0.01522	0.01536	0.01551	0.01566	0.01581	0.01596	0.01611	0.01627	0.01642	0.01657	0.01673	0.01688	0.01704	0.0172	0.01736	0.01751	0.01767	0.01783	0.018	0.01816	0.01832	0.01848	0.01865	0.01881	0.01898	0.01914	0.01931	0.01948	0.01964	0.01981
0.01135	0.01148	0.01162	0.01175	0.01189	0.01202	0.01216	0.0123	0.01244	0.01258	0.01272	0.01286	0.01301	0.01315	0.0133	0.01345	0.01359	0.01374	0.01389	0.01404	0.01419	0.01435	0.0145	0.01466	0.01481	0.01497	0.01513	0.01529	0.01545	0.01561	0.01577	0.01593	0.0161	0.01626	0.01643	0.01659	0.01676	0.01693	0.0171	0.01727	0.01744	0.01761	0.01779	0.01796	0.01814	0.01831	0.01849	0.01867	0.01885	0.01902
0.01029	0.01043	0.01056	0.01069	0.01083	0.01097	0.01111	0.01125	0.01139	0.01153	0.01167	0.01182	0.01197	0.01211	0.01226	0.01241	0.01256	0.01271	0.01287	0.01302	0.01318	0.01333	0.01349	0.01365	0.01381	0.01397	0.01414	0.0143	0.01447	0.01463	0.0148	0.01497	0.01514	0.01531	0.01548	0.01566	0.01583	0.01601	0.01618	0.01636	0.01654	0.01672	0.0169	0.01708	0.01727	0.01745	0.01764	0.01783	0.01801	0.0182
0.00928	0.00941	0.00955	0.00968	0.00982	0.00995	0.01009	0.01023	0.01037	0.01052	0.01066	0.01081	0.01095	0.0111	0.01125	0.0114	0.01156	0.01171	0.01187	0.01202	0.01218	0.01234	0.0125	0.01266	0.01283	0.01299	0.01316	0.01333	0.0135	0.01367	0.01384	0.01401	0.01419	0.01437	0.01454	0.01472	0.0149	0.01509	0.01527	0.01546	0.01564	0.01583	0.01602	0.01621	0.0164	0.0166	0.01679	0.01699	0.01718	0.01738
0.00832	0.00845	0.00858	0.00871	0.00884	0.00898	0.00912	0.00926	0.0094	0.00954	0.00968	0.00983	0.00997	0.01012	0.01027	0.01043	0.01058	0.01073	0.01089	0.01105	0.01121	0.01137	0.01153	0.0117	0.01186	0.01203	0.0122	0.01237	0.01255	0.01272	0.0129	0.01307	0.01325	0.01344	0.01362	0.0138	0.01399	0.01418	0.01437	0.01456	0.01475	0.01495	0.01514	0.01534	0.01554	0.01574	0.01594	0.01615	0.01635	0.01656
0.00739	0.00752	0.00765	0.00778	0.00791	0.00804	0.00818	0.00831	0.00845	0.00859	0.00873	0.00888	0.00902	0.00917	0.00932	0.00947	0.00962	0.00978	0.00993	0.01009	0.01025	0.01041	0.01058	0.01074	0.01091	0.01108	0.01125	0.01142	0.0116	0.01178	0.01195	0.01214	0.01232	0.0125	0.01269	0.01288	0.01307	0.01326	0.01346	0.01365	0.01385	0.01405	0.01425	0.01446	0.01466	0.01487	0.01508	0.0153	0.01551	0.01573
0.00651	0.00664	0.00676	0.00688	0.00701	0.00714	0.00727	0.0074	0.00754	0.00767	0.00781	0.00795	0.0081	0.00824	0.00839	0.00853	0.00868	0.00884	0.00899	0.00915	0.00931	0.00947	0.00963	0.00979	0.00996	0.01013	0.0103	0.01047	0.01065	0.01083	0.01101	0.01119	0.01137	0.01156	0.01175	0.01194	0.01213	0.01233	0.01253	0.01273	0.01293	0.01313	0.01334	0.01355	0.01376	0.01397	0.01419	0.01441	0.01463	0.01485
0.00568	0.00579	0.00591	0.00603	0.00615	0.00628	0.0064	0.00653	0.00666	0.00679	0.00692	0.00706	0.00719	0.00733	0.00747	0.00762	0.00776	0.00791	0.00806	0.00822	0.00837	0.00853	0.00869	0.00885	0.00901	0.00918	0.00935	0.00952	0.00969	0.00987	0.01005	0.01023	0.01041	0.0106	0.01079	0.01098	0.01117	0.01137	0.01157	0.01177	0.01197	0.01218	0.01239	0.0126	0.01282	0.01303	0.01325	0.01348	0.0137	0.01393
0.00489	0.005	0.00511	0.00522	0.00534	0.00545	0.00557	0.00569	0.00581	0.00594	0.00606	0.00619	0.00632	0.00646	0.00659	0.00673	0.00687	0.00701	0.00716	0.00731	0.00745	0.00761	0.00776	0.00792	0.00808	0.00824	0.0084	0.00857	0.00874	0.00891	0.00909	0.00927	0.00945	0.00963	0.00982	0.01001	0.0102	0.01039	0.01059	0.01079	0.01099	0.0112	0.01141	0.01162	0.01184	0.01205	0.01228	0.0125	0.01273	0.01296
0.00417	0.00427	0.00437	0.00447	0.00458	0.00468	0.00479	0.00491	0.00502	0.00514	0.00525	0.00537	0.0055	0.00562	0.00575	0.00588	0.00601	0.00615	0.00629	0.00642	0.00657	0.00671	0.00686	0.00701	0.00716	0.00732	0.00748	0.00764	0.0078	0.00797	0.00814	0.00831	0.00849	0.00866	0.00885	0.00903	0.00922	0.00941	0.0096	0.0098	0.01	0.0102	0.01041	0.01062	0.01083	0.01105	0.01126	0.01149	0.01171	0.01194
0.0035	0.00359	0.00369	0.00378	0.00388	0.00397	0.00407	0.00418	0.00428	0.00439	0.0045	0.00461	0.00472	0.00484	0.00496	0.00508	0.0052	0.00533	0.00546	0.00559	0.00572	0.00586	0.006	0.00614	0.00628	0.00643	0.00658	0.00673	0.00689	0.00705	0.00721	0.00737	0.00754	0.00771	0.00789	0.00806	0.00824	0.00843	0.00862	0.00881	0.009	0.0092	0.0094	0.0096	0.00981	0.01002	0.01024	0.01045	0.01068	0.0109
0.00291	0.00299	0.00307	0.00316	0.00324	0.00333	0.00342	0.00351	0.00361	0.0037	0.0038	0.0039	0.00401	0.00411	0.00422	0.00433	0.00445	0.00456	0.00468	0.0048	0.00492	0.00505	0.00518	0.00531	0.00545	0.00558	0.00572	0.00587	0.00601	0.00616	0.00631	0.00647	0.00663	0.00679	0.00695	0.00712	0.00729	0.00747	0.00765	0.00783	0.00802	0.00821	0.0084	0.00859	0.00879	0.009	0.00921	0.00942	0.00963	0.00985
0.00238	0.00245	0.00253	0.0026	0.00268	0.00275	0.00284	0.00292	0.003	0.00309	0.00318	0.00327	0.00336	0.00346	0.00355	0.00365	0.00376	0.00386	0.00397	0.00408	0.00419	0.0043	0.00442	0.00454	0.00467	0.00479	0.00492	0.00505	0.00519	0.00533	0.00547	0.00561	0.00576	0.00591	0.00607	0.00622	0.00638	0.00655	0.00672	0.00689	0.00706	0.00724	0.00743	0.00761	0.0078	0.008	0.00819	0.0084	0.0086	0.00881
0.00193	0.00199	0.00205	0.00212	0.00218	0.00225	0.00232	0.00239	0.00247	0.00254	0.00262	0.0027	0.00278	0.00287	0.00295	0.00304	0.00313	0.00323	0.00332	0.00342	0.00352	0.00363	0.00373	0.00384	0.00395	0.00407	0.00418	0.0043	0.00443	0.00455	0.00468	0.00482	0.00495	0.00509	0.00523	0.00538	0.00553	0.00568	0.00583	0.00599	0.00616	0.00632	0.00649	0.00667	0.00685	0.00703	0.00722	0.00741	0.0076	0.0078
0.00154	0.00159	0.00164	0.0017	0.00176	0.00181	0.00187	0.00194	0.002	0.00207	0.00213	0.0022	0.00227	0.00235	0.00242	0.0025	0.00258	0.00266	0.00275	0.00284	0.00293	0.00302	0.00311	0.00321	0.00331	0.00341	0.00352	0.00362	0.00373	0.00385	0.00396	0.00408	0.00421	0.00433	0.00446	0.00459	0.00473	0.00487	0.00501	0.00516	0.00531	0.00546	0.00562	0.00578	0.00595	0.00612	0.00629	0.00647	0.00665	0.00684
0.00121	0.00126	0.0013	0.00135	0.00139	0.00144	0.0015	0.00155	0.0016	0.00166	0.00172	0.00178	0.00184	0.0019	0.00197	0.00203	0.0021	0.00217	0.00225	0.00232	0.0024	0.00248	0.00256	0.00265	0.00274	0.00283	0.00292	0.00302	0.00311	0.00321	0.00332	0.00342	0.00353	0.00365	0.00376	0.00388	0.004	0.00413	0.00426	0.00439	0.00453	0.00467	0.00481	0.00496	0.00511	0.00526	0.00542	0.00559	0.00575	0.00593
0.000941	0.000977	0.00102	0.00105	0.00109	0.00114	0.00118	0.00122	0.00127	0.00131	0.00136	0.00141	0.00147	0.00152	0.00157	0.00163	0.00169	0.00175	0.00182	0.00188	0.00195	0.00202	0.00209	0.00216	0.00224	0.00232	0.0024	0.00248	0.00257	0.00265	0.00275	0.00284	0.00294	0.00304	0.00314	0.00324	0.00335	0.00346	0.00358	0.0037	0.00382	0.00395	0.00407	0.00421	0.00434	0.00448	0.00463	0.00478	0.00493	0.00508
0.000722	0.000752	0.000782	0.000814	0.000847	0.00088	0.000916	0.000952	0.00099	0.00103	0.00107	0.00111	0.00115	0.0012	0.00125	0.00129	0.00134	0.0014	0.00145	0.0015	0.00156	0.00162	0.00168	0.00174	0.00181	0.00188	0.00194	0.00202	0.00209	0.00217	0.00225	0.00233	0.00241	0.0025	0.00259	0.00268	0.00278	0.00287	0.00298	0.00308	0.00319	0.0033	0.00341	0.00353	0.00365	0.00378	0.00391	0.00404	0.00418	0.00432
0.000547	0.000571	0.000595	0.000621	0.000647	0.000675	0.000703	0.000733	0.000764	0.000795	0.000829	0.000863	0.000899	0.000936	0.000974	0.00101	0.00106	0.0011	0.00114	0.00119	0.00124	0.00129	0.00134	0.00139	0.00144	0.0015	0.00156	0.00162	0.00168	0.00175	0.00182	0.00189	0.00196	0.00203	0.00211	0.00219	0.00227	0.00236	0.00245	0.00254	0.00263	0.00273	0.00283	0.00293	0.00304	0.00315	0.00326	0.00338	0.0035	0.00363
0.00041	0.000428	0.000448	0.000468	0.000489	0.000511	0.000533	0.000557	0.000582	0.000608	0.000634	0.000662	0.000691	0.000721	0.000752	0.000785	0.000819	0.000854	0.00089	0.000928	0.000967	0.00101	0.00105	0.0011	0.00114	0.00119	0.00124	0.00129	0.00134	0.0014	0.00145	0.00151	0.00157	0.00164	0.0017	0.00177	0.00184	0.00191	0.00199	0.00207	0.00215	0.00223	0.00232	0.00241	0.0025	0.0026	0.0027	0.0028	0.00291	0.00302
0.000303	0.000317	0.000332	0.000348	0.000365	0.000382	0.0004	0.000419	0.000438	0.000459	0.00048	0.000502	0.000525	0.000549	0.000575	0.000601	0.000628	0.000656	0.000686	0.000717	0.000749	0.000782	0.000817	0.000853	0.000891	0.00093	0.00097	0.00101	0.00106	0.0011	0.00115	0.0012	0.00125	0.0013	0.00136	0.00142	0.00148	0.00154	0.0016	0.00167	0.00174	0.00181	0.00188	0.00196	0.00204	0.00212	0.00221	0.0023	0.00239	0.00248
0.000221	0.000232	0.000244	0.000256	0.000269	0.000282	0.000296	0.000311	0.000326	0.000342	0.000359	0.000377	0.000395	0.000414	0.000434	0.000455	0.000476	0.000499	0.000523	0.000547	0.000573	0.0006	0.000628	0.000657	0.000688	0.00072	0.000753	0.000787	0.000823	0.000861	0.0009	0.00094	0.000983	0.00103	0.00107	0.00112	0.00117	0.00122	0.00128	0.00133	0.00139	0.00145	0.00151	0.00158	0.00164	0.00171	0.00179	0.00186	0.00194	0.00202
0.00016	0.000168	0.000177	0.000186	0.000196	0.000206	0.000217	0.000228	0.00024	0.000253	0.000266	0.000279	0.000293	0.000308	0.000324	0.00034	0.000357	0.000375	0.000394	0.000414	0.000434	0.000456	0.000478	0.000501	0.000526	0.000551	0.000578	0.000606	0.000635	0.000666	0.000697	0.00073	0.000765	0.000801	0.000838	0.000878	0.000918	0.000961	0.00101	0.00105	0.0011	0.00115	0.0012	0.00126	0.00131	0.00137	0.00143	0.0015	0.00156	0.00163
0.000114	0.00012	0.000127	0.000134	0.000141	0.000149	0.000157	0.000166	0.000175	0.000184	0.000194	0.000205	0.000216	0.000227	0.000239	0.000252	0.000265	0.000279	0.000294	0.000309	0.000326	0.000342	0.00036	0.000379	0.000398	0.000418	0.00044	0.000462	0.000485	0.000509	0.000535	0.000562	0.000589	0.000619	0.000649	0.000681	0.000714	0.000749	0.000785	0.000823	0.000863	0.000904	0.000947	0.000992	0.00104	0.00109	0.00114	0.00119	0.00125	0.00131
8e-05	8.5e-05	9e-05	9.5e-05	0.000101	0.000107	0.000113	0.000119	0.000126	0.000133	0.000141	0.000149	0.000157	0.000166	0.000175	0.000185	0.000195	0.000206	0.000217	0.000229	0.000242	0.000255	0.000269	0.000283	0.000298	0.000314	0.000331	0.000349	0.000367	0.000386	0.000407	0.000428	0.00045	0.000473	0.000498	0.000523	0.00055	0.000578	0.000608	0.000639	0.000671	0.000704	0.00074	0.000776	0.000815	0.000855	0.000897	0.000941	0.000987	0.00104
5.6e-05	6e-05	6.3e-05	6.7e-05	7.1e-05	7.6e-05	8e-05	8.5e-05	9e-05	9.5e-05	0.000101	0.000107	0.000113	0.00012	0.000127	0.000134	0.000142	0.00015	0.000159	0.000168	0.000178	0.000188	0.000198	0.00021	0.000221	0.000234	0.000247	0.000261	0.000275	0.00029	0.000306	0.000323	0.000341	0.000359	0.000378	0.000399	0.00042	0.000443	0.000466	0.000491	0.000517	0.000544	0.000573	0.000602	0.000634	0.000667	0.000701	0.000737	0.000774	0.000814
3.9e-05	4.1e-05	4.4e-05	4.7e-05	5e-05	5.3e-05	5.6e-05	6e-05	6.4e-05	6.8e-05	7.2e-05	7.6e-05	8.1e-05	8.6e-05	9.1e-05	9.7e-05	0.000103	0.000109	0.000115	0.000122	0.00013	0.000137	0.000145	0.000154	0.000163	0.000173	0.000183	0.000193	0.000204	0.000216	0.000229	0.000242	0.000256	0.00027	0.000285	0.000301	0.000318	0.000336	0.000355	0.000374	0.000395	0.000417	0.00044	0.000464	0.000489	0.000515	0.000543	0.000572	0.000603	0.000635
2.7e-05	2.8e-05	3e-05	3.2e-05	3.5e-05	3.7e-05	3.9e-05	4.2e-05	4.5e-05	4.7e-05	5.1e-05	5.4e-05	5.7e-05	6.1e-05	6.5e-05	6.9e-05	7.3e-05	7.8e-05	8.3e-05	8.8e-05	9.4e-05	9.9e-05	0.000106	0.000112	0.000119	0.000126	0.000134	0.000142	0.000151	0.00016	0.000169	0.000179	0.00019	0.000201	0.000213	0.000226	0.000239	0.000253	0.000268	0.000283	0.0003	0.000317	0.000335	0.000354	0.000374	0.000395	0.000418	0.000441	0.000466	0.000491
1.8e-05	1.9e-05	2.1e-05	2.2e-05	2.4e-05	2.5e-05	2.7e-05	2.9e-05	3.1e-05	3.3e-05	3.5e-05	3.8e-05	4e-05	4.3e-05	4.6e-05	4.9e-05	5.2e-05	5.5e-05	5.9e-05	6.3e-05	6.7e-05	7.1e-05	7.6e-05	8.1e-05	8.6e-05	9.2e-05	9.7e-05	0.000104	0.00011	0.000117	0.000124	0.000132	0.00014	0.000149	0.000158	0.000168	0.000178	0.000189	0.000201	0.000213	0.000226	0.000239	0.000253	0.000268	0.000284	0.000301	0.000319	0.000337	0.000357	0.000378
1.2e-05	1.3e-05	1.4e-05	1.5e-05	1.6e-05	1.7e-05	1.9e-05	2e-05	2.1e-05	2.3e-05	2.4e-05	2.6e-05	2.8e-05	3e-05	3.2e-05	3.4e-05	3.7e-05	3.9e-05	4.2e-05	4.5e-05	4.8e-05	5.1e-05	5.4e-05	5.8e-05	6.2e-05	6.6e-05	7e-05	7.5e-05	8e-05	8.5e-05	9.1e-05	9.7e-05	0.000103	0.00011	0.000117	0.000124	0.000132	0.00014	0.000149	0.000159	0.000169	0.000179	0.00019	0.000202	0.000215	0.000228	0.000242	0.000256	0.000272	0.000288
8e-06	9e-06	9e-06	1e-05	1.1e-05	1.2e-05	1.3e-05	1.4e-05	1.5e-05	1.6e-05	1.7e-05	1.8e-05	1.9e-05	2.1e-05	2.2e-05	2.4e-05	2.6e-05	2.7e-05	2.9e-05	3.1e-05	3.4e-05	3.6e-05	3.9e-05	4.1e-05	4.4e-05	4.7e-05	5e-05	5.4e-05	5.8e-05	6.2e-05	6.6e-05	7e-05	7.5e-05	8e-05	8.5e-05	9.1e-05	9.7e-05	0.000103	0.00011	0.000118	0.000125	0.000133	0.000142	0.000151	0.000161	0.000171	0.000182	0.000194	0.000206	0.000219
5e-06	6e-06	6e-06	7e-06	7e-06	8e-06	8e-06	9e-06	1e-05	1.1e-05	1.1e-05	1.2e-05	1.3e-05	1.4e-05	1.5e-05	1.6e-05	1.8e-05	1.9e-05	2e-05	2.2e-05	2.4e-05	2.5e-05	2.7e-05	2.9e-05	3.1e-05	3.3e-05	3.6e-05	3.8e-05	4.1e-05	4.4e-05	4.7e-05	5.1e-05	5.4e-05	5.8e-05	6.2e-05	6.6e-05	7.1e-05	7.6e-05	8.1e-05	8.6e-05	9.2e-05	9.9e-05	0.000105	0.000112	0.00012	0.000128	0.000136	0.000145	0.000155	0.000165
4e-06	4e-06	4e-06	4e-06	5e-06	5e-06	6e-06	6e-06	7e-06	7e-06	8e-06	8e-06	9e-06	1e-05	1e-05	1.1e-05	1.2e-05	1.3e-05	1.4e-05	1.5e-05	1.6e-05	1.8e-05	1.9e-05	2e-05	2.2e-05	2.4e-05	2.5e-05	2.7e-05	2.9e-05	3.1e-05	3.4e-05	3.6e-05	3.9e-05	4.2e-05	4.5e-05	4.8e-05	5.1e-05	5.5e-05	5.9e-05	6.3e-05	6.8e-05	7.2e-05	7.8e-05	8.3e-05	8.9e-05	9.5e-05	0.000101	0.000108	0.000116	0.000124
2e-06	2e-06	3e-06	3e-06	3e-06	3e-06	4e-06	4e-06	4e-06	5e-06	5e-06	6e-06	6e-06	7e-06	7e-06	8e-06	8e-06	9e-06	1e-05	1e-05	1.1e-05	1.2e-05	1.3e-05	1.4e-05	1.5e-05	1.6e-05	1.8e-05	1.9e-05	2.1e-05	2.2e-05	2.4e-05	2.6e-05	2.8e-05	3e-05	3.2e-05	3.4e-05	3.7e-05	4e-05	4.3e-05	4.6e-05	4.9e-05	5.3e-05	5.7e-05	6.1e-05	6.5e-05	7e-05	7.5e-05	8e-05	8.6e-05	9.2e-05
1e-06	2e-06	2e-06	2e-06	2e-06	2e-06	2e-06	3e-06	3e-06	3e-06	3e-06	4e-06	4e-06	4e-06	5e-06	5e-06	6e-06	6e-06	7e-06	7e-06	8e-06	8e-06	9e-06	1e-05	1.1e-05	1.1e-05	1.2e-05	1.3e-05	1.4e-05	1.6e-05	1.7e-05	1.8e-05	2e-05	2.1e-05	2.3e-05	2.5e-05	2.7e-05	2.9e-05	3.1e-05	3.3e-05	3.6e-05	3.8e-05	4.1e-05	4.4e-05	4.8e-05	5.1e-05	5.5e-05	5.9e-05	6.4e-05	6.8e-05
1e-06	1e-06	1e-06	1e-06	1e-06	1e-06	2e-06	2e-06	2e-06	2e-06	2e-06	2e-06	3e-06	3e-06	3e-06	3e-06	4e-06	4e-06	4e-06	5e-06	5e-06	6e-06	6e-06	7e-06	7e-06	8e-06	9e-06	9e-06	1e-05	1.1e-05	1.2e-05	1.3e-05	1.4e-05	1.5e-05	1.6e-05	1.7e-05	1.9e-05	2e-05	2.2e-05	2.4e-05	2.6e-05	2.8e-05	3e-05	3.2e-05	3.5e-05	3.7e-05	4e-05	4.3e-05	4.7e-05	5e-05
1e-06	1e-06	1e-06	1e-06	1e-06	1e-06	1e-06	1e-06	1e-06	1e-06	1e-06	2e-06	2e-06	2e-06	2e-06	2e-06	3e-06	3e-06	3e-06	3e-06	4e-06	4e-06	4e-06	5e-06	5e-06	5e-06	6e-06	6e-06	7e-06	8e-06	8e-06	9e-06	1e-05	1e-05	1.1e-05	1.2e-05	1.3e-05	1.4e-05	1.6e-05	1.7e-05	1.8e-05	2e-05	2.1e-05	2.3e-05	2.5e-05	2.7e-05	2.9e-05	3.2e-05	3.4e-05	3.7e-05
0	0	0	1e-06	1e-06	1e-06	1e-06	1e-06	1e-06	1e-06	1e-06	1e-06	1e-06	1e-06	1e-06	2e-06	2e-06	2e-06	2e-06	2e-06	2e-06	3e-06	3e-06	3e-06	3e-06	4e-06	4e-06	4e-06	5e-06	5e-06	6e-06	6e-06	7e-06	7e-06	8e-06	9e-06	9e-06	1e-05	1.1e-05	1.2e-05	1.3e-05	1.4e-05	1.5e-05	1.7e-05	1.8e-05	2e-05	2.1e-05	2.3e-05	2.5e-05	2.7e-05
0	0	0	0	0	0	0	0	1e-06	1e-06	1e-06	1e-06	1e-06	1e-06	1e-06	1e-06	1e-06	1e-06	1e-06	1e-06	2e-06	2e-06	2e-06	2e-06	2e-06	2e-06	3e-06	3e-06	3e-06	4e-06	4e-06	4e-06	5e-06	5e-06	6e-06	6e-06	7e-06	7e-06	8e-06	8e-06	9e-06	1e-05	1.1e-05	1.2e-05	1.3e-05	1.4e-05	1.5e-05	1.7e-05	1.8e-05	1.9e-05
0	0	0	0	0	0	0	0	0	0	0	0	0	1e-06	1e-06	1e-06	1e-06	1e-06	1e-06	1e-06	1e-06	1e-06	1e-06	1e-06	2e-06	2e-06	2e-06	2e-06	2e-06	2e-06	3e-06	3e-06	3e-06	3e-06	4e-06	4e-06	5e-06	5e-06	5e-06	6e-06	6e-06	7e-06	8e-06	8e-06	9e-06	1e-05	1.1e-05	1.2e-05	1.3e-05	1.4e-05
0	0	0	0	0	0	0	0	0	0	0	0	0	0	0	0	0	1e-06	1e-06	1e-06	1e-06	1e-06	1e-06	1e-06	1e-06	1e-06	1e-06	1e-06	1e-06	2e-06	2e-06	2e-06	2e-06	2e-06	3e-06	3e-06	3e-06	3e-06	4e-06	4e-06	5e-06	5e-06	5e-06	6e-06	6e-06	7e-06	8e-06	8e-06	9e-06	1e-05
0	0	0	0	0	0	0	0	0	0	0	0	0	0	0	0	0	0	0	0	0	0	1e-06	1e-06	1e-06	1e-06	1e-06	1e-06	1e-06	1e-06	1e-06	1e-06	1e-06	2e-06	2e-06	2e-06	2e-06	2e-06	3e-06	3e-06	3e-06	3e-06	4e-06	4e-06	5e-06	5e-06	5e-06	6e-06	7e-06	7e-06
0	0	0	0	0	0	0	0	0	0	0	0	0	0	0	0	0	0	0	0	0	0	0	0	0	0	1e-06	1e-06	1e-06	1e-06	1e-06	1e-06	1e-06	1e-06	1e-06	1e-06	1e-06	2e-06	2e-06	2e-06	2e-06	2e-06	3e-06	3e-06	3e-06	3e-06	4e-06	4e-06	5e-06	5e-06
0	0	0	0	0	0	0	0	0	0	0	0	0	0	0	0	0	0	0	0	0	0	0	0	0	0	0	0	0	0	1e-06	1e-06	1e-06	1e-06	1e-06	1e-06	1e-06	1e-06	1e-06	1e-06	1e-06	2e-06	2e-06	2e-06	2e-06	2e-06	3e-06	3e-06	3e-06	4e-06
0	0	0	0	0	0	0	0	0	0	0	0	0	0	0	0	0	0	0	0	0	0	0	0	0	0	0	0	0	0	0	0	0	0	1e-06	1e-06	1e-06	1e-06	1e-06	1e-06	1e-06	1e-06	1e-06	1e-06	2e-06	2e-06	2e-06	2e-06	2e-06	3e-06
0	0	0	0	0	0	0	0	0	0	0	0	0	0	0	0	0	0	0	0	0	0	0	0	0	0	0	0	0	0	0	0	0	0	0	0	0	0	1e-06	1e-06	1e-06	1e-06	1e-06	1e-06	1e-06	1e-06	1e-06	1e-06	2e-06	2e-06
0	0	0	0	0	0	0	0	0	0	0	0	0	0	0	0	0	0	0	0	0	0	0	0	0	0	0	0	0	0	0	0	0	0	0	0	0	0	0	0	0	1e-06	1e-06	1e-06	1e-06	1e-06	1e-06	1e-06	1e-06	1e-06
0	0	0	0	0	0	0	0	0	0	0	0	0	0	0	0	0	0	0	0	0	0	0	0	0	0	0	0	0	0	0	0	0	0	0	0	0	0	0	0	0	0	0	0	0	1e-06	1e-06	1e-06	1e-06	1e-06
0	0	0	0	0	0	0	0	0	0	0	0	0	0	0	0	0	0	0	0	0	0	0	0	0	0	0	0	0	0	0	0	0	0	0	0	0	0	0	0	0	0	0	0	0	0	0	0	1e-06	1e-06
0	0	0	0	0	0	0	0	0	0	0	0	0	0	0	0	0	0	0	0	0	0	0	0	0	0	0	0	0	0	0	0	0	0	0	0	0	0	0	0	0	0	0	0	0	0	0	0	0	0
0	0	0	0	0	0	0	0	0	0	0	0	0	0	0	0	0	0	0	0	0	0	0	0	0	0	0	0	0	0	0	0	0	0	0	0	0	0	0	0	0	0	0	0	0	0	0	0	0	0
0	0	0	0	0	0	0	0	0	0	0	0	0	0	0	0	0	0	0	0	0	0	0	0	0	0	0	0	0	0	0	0	0	0	0	0	0	0	0	0	0	0	0	0	0	0	0	0	0	0
0	0	0	0	0	0	0	0	0	0	0	0	0	0	0	0	0	0	0	0	0	0	0	0	0	0	0	0	0	0	0	0	0	0	0	0	0	0	0	0	0	0	0	0	0	0	0	0	0	0
0	0	0	0	0	0	0	0	0	0	0	0	0	0	0	0	0	0	0	0	0	0	0	0	0	0	0	0	0	0	0	0	0	0	0	0	0	0	0	0	0	0	0	0	0	0	0	0	0	0
0	0	0	0	0	0	0	0	0	0	0	0	0	0	0	0	0	0	0	0	0	0	0	0	0	0	0	0	0	0	0	0	0	0	0	0	0	0	0	0	0	0	0	0	0	0	0	0	0	0
0	0	0	0	0	0	0	0	0	0	0	0	0	0	0	0	0	0	0	0	0	0	0	0	0	0	0	0	0	0	0	0	0	0	0	0	0	0	0	0	0	0	0	0	0	0	0	0	0	0
0	0	0	0	0	0	0	0	0	0	0	0	0	0	0	0	0	0	0	0	0	0	0	0	0	0	0	0	0	0	0	0	0	0	0	0	0	0	0	0	0	0	0	0	0	0	0	0	0	0
0	0	0	0	0	0	0	0	0	0	0	0	0	0	0	0	0	0	0	0	0	0	0	0	0	0	0	0	0	0	0	0	0	0	0	0	0	0	0	0	0	0	0	0	0	0	0	0	0	0
0	0	0	0	0	0	0	0	0	0	0	0	0	0	0	0	0	0	0	0	0	0	0	0	0	0	0	0	0	0	0	0	0	0	0	0	0	0	0	0	0	0	0	0	0	0	0	0	0	0
0	0	0	0	0	0	0	0	0	0	0	0	0	0	0	0	0	0	0	0	0	0	0	0	0	0	0	0	0	0	0	0	0	0	0	0	0	0	0	0	0	0	0	0	0	0	0	0	0	0
0	0	0	0	0	0	0	0	0	0	0	0	0	0	0	0	0	0	0	0	0	0	0	0	0	0	0	0	0	0	0	0	0	0	0	0	0	0	0	0	0	0	0	0	0	0	0	0	0	0
0	0	0	0	0	0	0	0	0	0	0	0	0	0	0	0	0	0	0	0	0	0	0	0	0	0	0	0	0	0	0	0	0	0	0	0	0	0	0	0	0	0	0	0	0	0	0	0	0	0
0	0	0	0	0	0	0	0	0	0	0	0	0	0	0	0	0	0	0	0	0	0	0	0	0	0	0	0	0	0	0	0	0	0	0	0	0	0	0	0	0	0	0	0	0	0	0	0	0	0
0	0	0	0	0	0	0	0	0	0	0	0	0	0	0	0	0	0	0	0	0	0	0	0	0	0	0	0	0	0	0	0	0	0	0	0	0	0	0	0	0	0	0	0	0	0	0	0	0	0
0	0	0	0	0	0	0	0	0	0	0	0	0	0	0	0	0	0	0	0	0	0	0	0	0	0	0	0	0	0	0	0	0	0	0	0	0	0	0	0	0	0	0	0	0	0	0	0	0	0
0	0	0	0	0	0	0	0	0	0	0	0	0	0	0	0	0	0	0	0	0	0	0	0	0	0	0	0	0	0	0	0	0	0	0	0	0	0	0	0	0	0	0	0	0	0	0	0	0	0
0	0	0	0	0	0	0	0	0	0	0	0	0	0	0	0	0	0	0	0	0	0	0	0	0	0	0	0	0	0	0	0	0	0	0	0	0	0	0	0	0	0	0	0	0	0	0	0	0	0
0	0	0	0	0	0	0	0	0	0	0	0	0	0	0	0	0	0	0	0	0	0	0	0	0	0	0	0	0	0	0	0	0	0	0	0	0	0	0	0	0	0	0	0	0	0	0	0	0	0
0	0	0	0	0	0	0	0	0	0	0	0	0	0	0	0	0	0	0	0	0	0	0	0	0	0	0	0	0	0	0	0	0	0	0	0	0	0	0	0	0	0	0	0	0	0	0	0	0	0
0	0	0	0	0	0	0	0	0	0	0	0	0	0	0	0	0	0	0	0	0	0	0	0	0	0	0	0	0	0	0	0	0	0	0	0	0	0	0	0	0	0	0	0	0	0	0	0	0	0
0	0	0	0	0	0	0	0	0	0	0	0	0	0	0	0	0	0	0	0	0	0	0	0	0	0	0	0	0	0	0	0	0	0	0	0	0	0	0	0	0	0	0	0	0	0	0	0	0	0
0	0	0	0	0	0	0	0	0	0	0	0	0	0	0	0	0	0	0	0	0	0	0	0	0	0	0	0	0	0	0	0	0	0	0	0	0	0	0	0	0	0	0	0	0	0	0	0	0	0
0	0	0	0	0	0	0	0	0	0	0	0	0	0	0	0	0	0	0	0	0	0	0	0	0	0	0	0	0	0	0	0	0	0	0	0	0	0	0	0	0	0	0	0	0	0	0	0	0	0
0	0	0	0	0	0	0	0	0	0	0	0	0	0	0	0	0	0	0	0	0	0	0	0	0	0	0	0	0	0	0	0	0	0	0	0	0	0	0	0	0	0	0	0	0	0	0	0	0	0
0	0	0	0	0	0	0	0	0	0	0	0	0	0	0	0	0	0	0	0	0	0	0	0	0	0	0	0	0	0	0	0	0	0	0	0	0	0	0	0	0	0	0	0	0	0	0	0	0	0
0	0	0	0	0	0	0	0	0	0	0	0	0	0	0	0	0	0	0	0	0	0	0	0	0	0	0	0	0	0	0	0	0	0	0	0	0	0	0	0	0	0	0	0	0	0	0	0	0	0
0	0	0	0	0	0	0	0	0	0	0	0	0	0	0	0	0	0	0	0	0	0	0	0	0	0	0	0	0	0	0	0	0	0	0	0	0	0	0	0	0	0	0	0	0	0	0	0	0	0
0	0	0	0	0	0	0	0	0	0	0	0	0	0	0	0	0	0	0	0	0	0	0	0	0	0	0	0	0	0	0	0	0	0	0	0	0	0	0	0	0	0	0	0	0	0	0	0	0	0
0	0	0	0	0	0	0	0	0	0	0	0	0	0	0	0	0	0	0	0	0	0	0	0	0	0	0	0	0	0	0	0	0	0	0	0	0	0	0	0	0	0	0	0	0	0	0	0	0	0
0	0	0	0	0	0	0	0	0	0	0	0	0	0	0	0	0	0	0	0	0	0	0	0	0	0	0	0	0	0	0	0	0	0	0	0	0	0	0	0	0	0	0	0	0	0	0	0	0	0
0	0	0	0	0	0	0	0	0	0	0	0	0	0	0	0	0	0	0	0	0	0	0	0	0	0	0	0	0	0	0	0	0	0	0	0	0	0	0	0	0	0	0	0	0	0	0	0	0	0
0	0	0	0	0	0	0	0	0	0	0	0	0	0	0	0	0	0	0	0	0	0	0	0	0	0	0	0	0	0	0	0	0	0	0	0	0	0	0	0	0	0	0	0	0	0	0	0	0	0
0	0	0	0	0	0	0	0	0	0	0	0	0	0	0	0	0	0	0	0	0	0	0	0	0	0	0	0	0	0	0	0	0	0	0	0	0	0	0	0	0	0	0	0	0	0	0	0	0	0
0	0	0	0	0	0	0	0	0	0	0	0	0	0	0	0	0	0	0	0	0	0	0	0	0	0	0	0	0	0	0	0	0	0	0	0	0	0	0	0	0	0	0	0	0	0	0	0	0	0
0	0	0	0	0	0	0	0	0	0	0	0	0	0	0	0	0	0	0	0	0	0	0	0	0	0	0	0	0	0	0	0	0	0	0	0	0	0	0	0	0	0	0	0	0	0	0	0	0	0
0	0	0	0	0	0	0	0	0	0	0	0	0	0	0	0	0	0	0	0	0	0	0	0	0	0	0	0	0	0	0	0	0	0	0	0	0	0	0	0	0	0	0	0	0	0	0	0	0	0
0	0	0	0	0	0	0	0	0	0	0	0	0	0	0	0	0	0	0	0	0	0	0	0	0	0	0	0	0	0	0	0	0	0	0	0	0	0	0	0	0	0	0	0	0	0	0	0	0	0
0	0	0	0	0	0	0	0	0	0	0	0	0	0	0	0	0	0	0	0	0	0	0	0	0	0	0	0	0	0	0	0	0	0	0	0	0	0	0	0	0	0	0	0	0	0	0	0	0	0
0	0	0	0	0	0	0	0	0	0	0	0	0	0	0	0	0	0	0	0	0	0	0	0	0	0	0	0	0	0	0	0	0	0	0	0	0	0	0	0	0	0	0	0	0	0	0	0	0	0
0	0	0	0	0	0	0	0	0	0	0	0	0	0	0	0	0	0	0	0	0	0	0	0	0	0	0	0	0	0	0	0	0	0	0	0	0	0	0	0	0	0	0	0	0	0	0	0	0	0
0	0	0	0	0	0	0	0	0	0	0	0	0	0	0	0	0	0	0	0	0	0	0	0	0	0	0	0	0	0	0	0	0	0	0	0	0	0	0	0	0	0	0	0	0	0	0	0	0	0
0	0	0	0	0	0	0	0	0	0	0	0	0	0	0	0	0	0	0	0	0	0	0	0	0	0	0	0	0	0	0	0	0	0	0	0	0	0	0	0	0	0	0	0	0	0	0	0	0	0
0	0	0	0	0	0	0	0	0	0	0	0	0	0	0	0	0	0	0	0	0	0	0	0	0	0	0	0	0	0	0	0	0	0	0	0	0	0	0	0	0	0	0	0	0	0	0	0	0	0
0	0	0	0	0	0	0	0	0	0	0	0	0	0	0	0	0	0	0	0	0	0	0	0	0	0	0	0	0	0	0	0	0	0	0	0	0	0	0	0	0	0	0	0	0	0	0	0	0	0
0	0	0	0	0	0	0	0	0	0	0	0	0	0	0	0	0	0	0	0	0	0	0	0	0	0	0	0	0	0	0	0	0	0	0	0	0	0	0	0	0	0	0	0	0	0	0	0	0	0
0	0	0	0	0	0	0	0	0	0	0	0	0	0	0	0	0	0	0	0	0	0	0	0	0	0	0	0	0	0	0	0	0	0	0	0	0	0	0	0	0	0	0	0	0	0	0	0	0	0
0	0	0	0	0	0	0	0	0	0	0	0	0	0	0	0	0	0	0	0	0	0	0	0	0	0	0	0	0	0	0	0	0	0	0	0	0	0	0	0	0	0	0	0	0	0	0	0	0	0
0	0	0	0	0	0	0	0	0	0	0	0	0	0	0	0	0	0	0	0	0	0	0	0	0	0	0	0	0	0	0	0	0	0	0	0	0	0	0	0	0	0	0	0	0	0	0	0	0	0
0	0	0	0	0	0	0	0	0	0	0	0	0	0	0	0	0	0	0	0	0	0	0	0	0	0	0	0	0	0	0	0	0	0	0	0	0	0	0	0	0	0	0	0	0	0	0	0	0	0
0	0	0	0	0	0	0	0	0	0	0	0	0	0	0	0	0	0	0	0	0	0	0	0	0	0	0	0	0	0	0	0	0	0	0	0	0	0	0	0	0	0	0	0	0	0	0	0	0	0
0	0	0	0	0	0	0	0	0	0	0	0	0	0	0	0	0	0	0	0	0	0	0	0	0	0	0	0	0	0	0	0	0	0	0	0	0	0	0	0	0	0	0	0	0	0	0	0	0	0
0	0	0	0	0	0	0	0	0	0	0	0	0	0	0	0	0	0	0	0	0	0	0	0	0	0	0	0	0	0	0	0	0	0	0	0	0	0	0	0	0	0	0	0	0	0	0	0	0	0
0	0	0	0	0	0	0	0	0	0	0	0	0	0	0	0	0	0	0	0	0	0	0	0	0	0	0	0	0	0	0	0	0	0	0	0	0	0	0	0	0	0	0	0	0	0	0	0	0	0
0	0	0	0	0	0	0	0	0	0	0	0	0	0	0	0	0	0	0	0	0	0	0	0	0	0	0	0	0	0	0	0	0	0	0	0	0	0	0	0	0	0	0	0	0	0	0	0	0	0
0	0	0	0	0	0	0	0	0	0	0	0	0	0	0	0	0	0	0	0	0	0	0	0	0	0	0	0	0	0	0	0	0	0	0	0	0	0	0	0	0	0	0	0	0	0	0	0	0	0
0	0	0	0	0	0	0	0	0	0	0	0	0	0	0	0	0	0	0	0	0	0	0	0	0	0	0	0	0	0	0	0	0	0	0	0	0	0	0	0	0	0	0	0	0	0	0	0	0	0
0	0	0	0	0	0	0	0	0	0	0	0	0	0	0	0	0	0	0	0	0	0	0	0	0	0	0	0	0	0	0	0	0	0	0	0	0	0	0	0	0	0	0	0	0	0	0	0	0	0
0	0	0	0	0	0	0	0	0	0	0	0	0	0	0	0	0	0	0	0	0	0	0	0	0	0	0	0	0	0	0	0	0	0	0	0	0	0	0	0	0	0	0	0	0	0	0	0	0	0
0	0	0	0	0	0	0	0	0	0	0	0	0	0	0	0	0	0	0	0	0	0	0	0	0	0	0	0	0	0	0	0	0	0	0	0	0	0	0	0	0	0	0	0	0	0	0	0	0	0
0	0	0	0	0	0	0	0	0	0	0	0	0	0	0	0	0	0	0	0	0	0	0	0	0	0	0	0	0	0	0	0	0	0	0	0	0	0	0	0	0	0	0	0	0	0	0	0	0	0
0	0	0	0	0	0	0	0	0	0	0	0	0	0	0	0	0	0	0	0	0	0	0	0	0	0	0	0	0	0	0	0	0	0	0	0	0	0	0	0	0	0	0	0	0	0	0	0	0	0
0	0	0	0	0	0	0	0	0	0	0	0	0	0	0	0	0	0	0	0	0	0	0	0	0	0	0	0	0	0	0	0	0	0	0	0	0	0	0	0	0	0	0	0	0	0	0	0	0	0
0	0	0	0	0	0	0	0	0	0	0	0	0	0	0	0	0	0	0	0	0	0	0	0	0	0	0	0	0	0	0	0	0	0	0	0	0	0	0	0	0	0	0	0	0	0	0	0	0	0
0	0	0	0	0	0	0	0	0	0	0	0	0	0	0	0	0	0	0	0	0	0	0	0	0	0	0	0	0	0	0	0	0	0	0	0	0	0	0	0	0	0	0	0	0	0	0	0	0	0
0	0	0	0	0	0	0	0	0	0	0	0	0	0	0	0	0	0	0	0	0	0	0	0	0	0	0	0	0	0	0	0	0	0	0	0	0	0	0	0	0	0	0	0	0	0	0	0	0	0
0	0	0	0	0	0	0	0	0	0	0	0	0	0	0	0	0	0	0	0	0	0	0	0	0	0	0	0	0	0	0	0	0	0	0	0	0	0	0	0	0	0	0	0	0	0	0	0	0	0
0	0	0	0	0	0	0	0	0	0	0	0	0	0	0	0	0	0	0	0	0	0	0	0	0	0	0	0	0	0	0	0	0	0	0	0	0	0	0	0	0	0	0	0	0	0	0	0	0	0
0	0	0	0	0	0	0	0	0	0	0	0	0	0	0	0	0	0	0	0	0	0	0	0	0	0	0	0	0	0	0	0	0	0	0	0	0	0	0	0	0	0	0	0	0	0	0	0	0	0
0	0	0	0	0	0	0	0	0	0	0	0	0	0	0	0	0	0	0	0	0	0	0	0	0	0	0	0	0	0	0	0	0	0	0	0	0	0	0	0	0	0	0	0	0	0	0	0	0	0
0	0	0	0	0	0	0	0	0	0	0	0	0	0	0	0	0	0	0	0	0	0	0	0	0	0	0	0	0	0	0	0	0	0	0	0	0	0	0	0	0	0	0	0	0	0	0	0	0	0
0	0	0	0	0	0	0	0	0	0	0	0	0	0	0	0	0	0	0	0	0	0	0	0	0	0	0	0	0	0	0	0	0	0	0	0	0	0	0	0	0	0	0	0	0	0	0	0	0	0
0	0	0	0	0	0	0	0	0	0	0	0	0	0	0	0	0	0	0	0	0	0	0	0	0	0	0	0	0	0	0	0	0	0	0	0	0	0	0	0	0	0	0	0	0	0	0	0	0	0
0	0	0	0	0	0	0	0	0	0	0	0	0	0	0	0	0	0	0	0	0	0	0	0	0	0	0	0	0	0	0	0	0	0	0	0	0	0	0	0	0	0	0	0	0	0	0	0	0	0
0	0	0	0	0	0	0	0	0	0	0	0	0	0	0	0	0	0	0	0	0	0	0	0	0	0	0	0	0	0	0	0	0	0	0	0	0	0	0	0	0	0	0	0	0	0	0	0	0	0
0	0	0	0	0	0	0	0	0	0	0	0	0	0	0	0	0	0	0	0	0	0	0	0	0	0	0	0	0	0	0	0	0	0	0	0	0	0	0	0	0	0	0	0	0	0	0	0	0	0
0	0	0	0	0	0	0	0	0	0	0	0	0	0	0	0	0	0	0	0	0	0	0	0	0	0	0	0	0	0	0	0	0	0	0	0	0	0	0	0	0	0	0	0	0	0	0	0	0	0
0	0	0	0	0	0	0	0	0	0	0	0	0	0	0	0	0	0	0	0	0	0	0	0	0	0	0	0	0	0	0	0	0	0	0	0	0	0	0	0	0	0	0	0	0	0	0	0	0	0
0	0	0	0	0	0	0	0	0	0	0	0	0	0	0	0	0	0	0	0	0	0	0	0	0	0	0	0	0	0	0	0	0	0	0	0	0	0	0	0	0	0	0	0	0	0	0	0	0	0
0	0	0	0	0	0	0	0	0	0	0	0	0	0	0	0	0	0	0	0	0	0	0	0	0	0	0	0	0	0	0	0	0	0	0	0	0	0	0	0	0	0	0	0	0	0	0	0	0	0
0	0	0	0	0	0	0	0	0	0	0	0	0	0	0	0	0	0	0	0	0	0	0	0	0	0	0	0	0	0	0	0	0	0	0	0	0	0	0	0	0	0	0	0	0	0	0	0	0	0
0	0	0	0	0	0	0	0	0	0	0	0	0	0	0	0	0	0	0	0	0	0	0	0	0	0	0	0	0	0	0	0	0	0	0	0	0	0	0	0	0	0	0	0	0	0	0	0	0	0
0	0	0	0	0	0	0	0	0	0	0	0	0	0	0	0	0	0	0	0	0	0	0	0	0	0	0	0	0	0	0	0	0	0	0	0	0	0	0	0	0	0	0	0	0	0	0	0	0	0
0	0	0	0	0	0	0	0	0	0	0	0	0	0	0	0	0	0	0	0	0	0	0	0	0	0	0	0	0	0	0	0	0	0	0	0	0	0	0	0	0	0	0	0	0	0	0	0	0	0
0	0	0	0	0	0	0	0	0	0	0	0	0	0	0	0	0	0	0	0	0	0	0	0	0	0	0	0	0	0	0	0	0	0	0	0	0	0	0	0	0	0	0	0	0	0	0	0	0	0
0	0	0	0	0	0	0	0	0	0	0	0	0	0	0	0	0	0	0	0	0	0	0	0	0	0	0	0	0	0	0	0	0	0	0	0	0	0	0	0	0	0	0	0	0	0	0	0	0	0
0	0	0	0	0	0	0	0	0	0	0	0	0	0	0	0	0	0	0	0	0	0	0	0	0	0	0	0	0	0	0	0	0	0	0	0	0	0	0	0	0	0	0	0	0	0	0	0	0	0
0	0	0	0	0	0	0	0	0	0	0	0	0	0	0	0	0	0	0	0	0	0	0	0	0	0	0	0	0	0	0	0	0	0	0	0	0	0	0	0	0	0	0	0	0	0	0	0	0	0
0	0	0	0	0	0	0	0	0	0	0	0	0	0	0	0	0	0	0	0	0	0	0	0	0	0	0	0	0	0	0	0	0	0	0	0	0	0	0	0	0	0	0	0	0	0	0	0	0	0
0	0	0	0	0	0	0	0	0	0	0	0	0	0	0	0	0	0	0	0	0	0	0	0	0	0	0	0	0	0	0	0	0	0	0	0	0	0	0	0	0	0	0	0	0	0	0	0	0	0
0	0	0	0	0	0	0	0	0	0	0	0	0	0	0	0	0	0	0	0	0	0	0	0	0	0	0	0	0	0	0	0	0	0	0	0	0	0	0	0	0	0	0	0	0	0	0	0	0	0
0	0	0	0	0	0	0	0	0	0	0	0	0	0	0	0	0	0	0	0	0	0	0	0	0	0	0	0	0	0	0	0	0	0	0	0	0	0	0	0	0	0	0	0	0	0	0	0	0	0
0	0	0	0	0	0	0	0	0	0	0	0	0	0	0	0	0	0	0	0	0	0	0	0	0	0	0	0	0	0	0	0	0	0	0	0	0	0	0	0	0	0	0	0	0	0	0	0	0	0
0	0	0	0	0	0	0	0	0	0	0	0	0	0	0	0	0	0	0	0	0	0	0	0	0	0	0	0	0	0	0	0	0	0	0	0	0	0	0	0	0	0	0	0	0	0	0	0	0	0
0	0	0	0	0	0	0	0	0	0	0	0	0	0	0	0	0	0	0	0	0	0	0	0	0	0	0	0	0	0	0	0	0	0	0	0	0	0	0	0	0	0	0	0	0	0	0	0	0	0
0	0	0	0	0	0	0	0	0	0	0	0	0	0	0	0	0	0	0	0	0	0	0	0	0	0	0	0	0	0	0	0	0	0	0	0	0	0	0	0	0	0	0	0	0	0	0	0	0	0
0	0	0	0	0	0	0	0	0	0	0	0	0	0	0	0	0	0	0	0	0	0	0	0	0	0	0	0	0	0	0	0	0	0	0	0	0	0	0	0	0	0	0	0	0	0	0	0	0	0
0	0	0	0	0	0	0	0	0	0	0	0	0	0	0	0	0	0	0	0	0	0	0	0	0	0	0	0	0	0	0	0	0	0	0	0	0	0	0	0	0	0	0	0	0	0	0	0	0	0
0	0	0	0	0	0	0	0	0	0	0	0	0	0	0	0	0	0	0	0	0	0	0	0	0	0	0	0	0	0	0	0	0	0	0	0	0	0	0	0	0	0	0	0	0	0	0	0	0	0
0	0	0	0	0	0	0	0	0	0	0	0	0	0	0	0	0	0	0	0	0	0	0	0	0	0	0	0	0	0	0	0	0	0	0	0	0	0	0	0	0	0	0	0	0	0	0	0	0	0
0	0	0	0	0	0	0	0	0	0	0	0	0	0	0	0	0	0	0	0	0	0	0	0	0	0	0	0	0	0	0	0	0	0	0	0	0	0	0	0	0	0	0	0	0	0	0	0	0	0
0	0	0	0	0	0	0	0	0	0	0	0	0	0	0	0	0	0	0	0	0	0	0	0	0	0	0	0	0	0	0	0	0	0	0	0	0	0	0	0	0	0	0	0	0	0	0	0	0	0
0	0	0	0	0	0	0	0	0	0	0	0	0	0	0	0	0	0	0	0	0	0	0	0	0	0	0	0	0	0	0	0	0	0	0	0	0	0	0	0	0	0	0	0	0	0	0	0	0	0
0	0	0	0	0	0	0	0	0	0	0	0	0	0	0	0	0	0	0	0	0	0	0	0	0	0	0	0	0	0	0	0	0	0	0	0	0	0	0	0	0	0	0	0	0	0	0	0	0	0
0	0	0	0	0	0	0	0	0	0	0	0	0	0	0	0	0	0	0	0	0	0	0	0	0	0	0	0	0	0	0	0	0	0	0	0	0	0	0	0	0	0	0	0	0	0	0	0	0	0
0	0	0	0	0	0	0	0	0	0	0	0	0	0	0	0	0	0	0	0	0	0	0	0	0	0	0	0	0	0	0	0	0	0	0	0	0	0	0	0	0	0	0	0	0	0	0	0	0	0
0	0	0	0	0	0	0	0	0	0	0	0	0	0	0	0	0	0	0	0	0	0	0	0	0	0	0	0	0	0	0	0	0	0	0	0	0	0	0	0	0	0	0	0	0	0	0	0	0	0
0	0	0	0	0	0	0	0	0	0	0	0	0	0	0	0	0	0	0	0	0	0	0	0	0	0	0	0	0	0	0	0	0	0	0	0	0	0	0	0	0	0	0	0	0	0	0	0	0	0
0	0	0	0	0	0	0	0	0	0	0	0	0	0	0	0	0	0	0	0	0	0	0	0	0	0	0	0	0	0	0	0	0	0	0	0	0	0	0	0	0	0	0	0	0	0	0	0	0	0
0	0	0	0	0	0	0	0	0	0	0	0	0	0	0	0	0	0	0	0	0	0	0	0	0	0	0	0	0	0	0	0	0	0	0	0	0	0	0	0	0	0	0	0	0	0	0	0	0	0
0	0	0	0	0	0	0	0	0	0	0	0	0	0	0	0	0	0	0	0	0	0	0	0	0	0	0	0	0	0	0	0	0	0	0	0	0	0	0	0	0	0	0	0	0	0	0	0	0	0
0	0	0	0	0	0	0	0	0	0	0	0	0	0	0	0	0	0	0	0	0	0	0	0	0	0	0	0	0	0	0	0	0	0	0	0	0	0	0	0	0	0	0	0	0	0	0	0	0	0
0	0	0	0	0	0	0	0	0	0	0	0	0	0	0	0	0	0	0	0	0	0	0	0	0	0	0	0	0	0	0	0	0	0	0	0	0	0	0	0	0	0	0	0	0	0	0	0	0	0
0	0	0	0	0	0	0	0	0	0	0	0	0	0	0	0	0	0	0	0	0	0	0	0	0	0	0	0	0	0	0	0	0	0	0	0	0	0	0	0	0	0	0	0	0	0	0	0	0	0
0	0	0	0	0	0	0	0	0	0	0	0	0	0	0	0	0	0	0	0	0	0	0	0	0	0	0	0	0	0	0	0	0	0	0	0	0	0	0	0	0	0	0	0	0	0	0	0	0	0
0	0	0	0	0	0	0	0	0	0	0	0	0	0	0	0	0	0	0	0	0	0	0	0	0	0	0	0	0	0	0	0	0	0	0	0	0	0	0	0	0	0	0	0	0	0	0	0	0	0
0	0	0	0	0	0	0	0	0	0	0	0	0	0	0	0	0	0	0	0	0	0	0	0	0	0	0	0	0	0	0	0	0	0	0	0	0	0	0	0	0	0	0	0	0	0	0	0	0	0
0	0	0	0	0	0	0	0	0	0	0	0	0	0	0	0	0	0	0	0	0	0	0	0	0	0	0	0	0	0	0	0	0	0	0	0	0	0	0	0	0	0	0	0	0	0	0	0	0	0
0	0	0	0	0	0	0	0	0	0	0	0	0	0	0	0	0	0	0	0	0	0	0	0	0	0	0	0	0	0	0	0	0	0	0	0	0	0	0	0	0	0	0	0	0	0	0	0	0	0
0	0	0	0	0	0	0	0	0	0	0	0	0	0	0	0	0	0	0	0	0	0	0	0	0	0	0	0	0	0	0	0	0	0	0	0	0	0	0	0	0	0	0	0	0	0	0	0	0	0
0	0	0	0	0	0	0	0	0	0	0	0	0	0	0	0	0	0	0	0	0	0	0	0	0	0	0	0	0	0	0	0	0	0	0	0	0	0	0	0	0	0	0	0	0	0	0	0	0	0
0	0	0	0	0	0	0	0	0	0	0	0	0	0	0	0	0	0	0	0	0	0	0	0	0	0	0	0	0	0	0	0	0	0	0	0	0	0	0	0	0	0	0	0	0	0	0	0	0	0
0	0	0	0	0	0	0	0	0	0	0	0	0	0	0	0	0	0	0	0	0	0	0	0	0	0	0	0	0	0	0	0	0	0	0	0	0	0	0	0	0	0	0	0	0	0	0	0	0	0
0	0	0	0	0	0	0	0	0	0	0	0	0	0	0	0	0	0	0	0	0	0	0	0	0	0	0	0	0	0	0	0	0	0	0	0	0	0	0	0	0	0	0	0	0	0	0	0	0	0
0	0	0	0	0	0	0	0	0	0	0	0	0	0	0	0	0	0	0	0	0	0	0	0	0	0	0	0	0	0	0	0	0	0	0	0	0	0	0	0	0	0	0	0	0	0	0	0	0	0
0	0	0	0	0	0	0	0	0	0	0	0	0	0	0	0	0	0	0	0	0	0	0	0	0	0	0	0	0	0	0	0	0	0	0	0	0	0	0	0	0	0	0	0	0	0	0	0	0	0
0	0	0	0	0	0	0	0	0	0	0	0	0	0	0	0	0	0	0	0	0	0	0	0	0	0	0	0	0	0	0	0	0	0	0	0	0	0	0	0	0	0	0	0	0	0	0	0	0	0
0	0	0	0	0	0	0	0	0	0	0	0	0	0	0	0	0	0	0	0	0	0	0	0	0	0	0	0	0	0	0	0	0	0	0	0	0	0	0	0	0	0	0	0	0	0	0	0	0	0
0	0	0	0	0	0	0	0	0	0	0	0	0	0	0	0	0	0	0	0	0	0	0	0	0	0	0	0	0	0	0	0	0	0	0	0	0	0	0	0	0	0	0	0	0	0	0	0	0	0
0	0	0	0	0	0	0	0	0	0	0	0	0	0	0	0	0	0	0	0	0	0	0	0	0	0	0	0	0	0	0	0	0	0	0	0	0	0	0	0	0	0	0	0	0	0	0	0	0	0
0	0	0	0	0	0	0	0	0	0	0	0	0	0	0	0	0	0	0	0	0	0	0	0	0	0	0	0	0	0	0	0	0	0	0	0	0	0	0	0	0	0	0	0	0	0	0	0	0	0
0	0	0	0	0	0	0	0	0	0	0	0	0	0	0	0	0	0	0	0	0	0	0	0	0	0	0	0	0	0	0	0	0	0	0	0	0	0	0	0	0	0	0	0	0	0	0	0	0	0
0	0	0	0	0	0	0	0	0	0	0	0	0	0	0	0	0	0	0	0	0	0	0	0	0	0	0	0	0	0	0	0	0	0	0	0	0	0	0	0	0	0	0	0	0	0	0	0	0	0
0	0	0	0	0	0	0	0	0	0	0	0	0	0	0	0	0	0	0	0	0	0	0	0	0	0	0	0	0	0	0	0	0	0	0	0	0	0	0	0	0	0	0	0	0	0	0	0	0	0
0	0	0	0	0	0	0	0	0	0	0	0	0	0	0	0	0	0	0	0	0	0	0	0	0	0	0	0	0	0	0	0	0	0	0	0	0	0	0	0	0	0	0	0	0	0	0	0	0	0
0	0	0	0	0	0	0	0	0	0	0	0	0	0	0	0	0	0	0	0	0	0	0	0	0	0	0	0	0	0	0	0	0	0	0	0	0	0	0	0	0	0	0	0	0	0	0	0	0	0
0	0	0	0	0	0	0	0	0	0	0	0	0	0	0	0	0	0	0	0	0	0	0	0	0	0	0	0	0	0	0	0	0	0	0	0	0	0	0	0	0	0	0	0	0	0	0	0	0	0
0	0	0	0	0	0	0	0	0	0	0	0	0	0	0	0	0	0	0	0	0	0	0	0	0	0	0	0	0	0	0	0	0	0	0	0	0	0	0	0	0	0	0	0	0	0	0	0	0	0
0	0	0	0	0	0	0	0	0	0	0	0	0	0	0	0	0	0	0	0	0	0	0	0	0	0	0	0	0	0	0	0	0	0	0	0	0	0	0	0	0	0	0	0	0	0	0	0	0	0
0	0	0	0	0	0	0	0	0	0	0	0	0	0	0	0	0	0	0	0	0	0	0	0	0	0	0	0	0	0	0	0	0	0	0	0	0	0	0	0	0	0	0	0	0	0	0	0	0	0
0	0	0	0	0	0	0	0	0	0	0	0	0	0	0	0	0	0	0	0	0	0	0	0	0	0	0	0	0	0	0	0	0	0	0	0	0	0	0	0	0	0	0	0	0	0	0	0	0	0
0	0	0	0	0	0	0	0	0	0	0	0	0	0	0	0	0	0	0	0	0	0	0	0	0	0	0	0	0	0	0	0	0	0	0	0	0	0	0	0	0	0	0	0	0	0	0	0	0	0
0	0	0	0	0	0	0	0	0	0	0	0	0	0	0	0	0	0	0	0	0	0	0	0	0	0	0	0	0	0	0	0	0	0	0	0	0	0	0	0	0	0	0	0	0	0	0	0	0	0
0	0	0	0	0	0	0	0	0	0	0	0	0	0	0	0	0	0	0	0	0	0	0	0	0	0	0	0	0	0	0	0	0	0	0	0	0	0	0	0	0	0	0	0	0	0	0	0	0	0
0	0	0	0	0	0	0	0	0	0	0	0	0	0	0	0	0	0	0	0	0	0	0	0	0	0	0	0	0	0	0	0	0	0	0	0	0	0	0	0	0	0	0	0	0	0	0	0	0	0
0	0	0	0	0	0	0	0	0	0	0	0	0	0	0	0	0	0	0	0	0	0	0	0	0	0	0	0	0	0	0	0	0	0	0	0	0	0	0	0	0	0	0	0	0	0	0	0	0	0
0	0	0	0	0	0	0	0	0	0	0	0	0	0	0	0	0	0	0	0	0	0	0	0	0	0	0	0	0	0	0	0	0	0	0	0	0	0	0	0	0	0	0	0	0	0	0	0	0	0
0	0	0	0	0	0	0	0	0	0	0	0	0	0	0	0	0	0	0	0	0	0	0	0	0	0	0	0	0	0	0	0	0	0	0	0	0	0	0	0	0	0	0	0	0	0	0	0	0	0
0	0	0	0	0	0	0	0	0	0	0	0	0	0	0	0	0	0	0	0	0	0	0	0	0	0	0	0	0	0	0	0	0	0	0	0	0	0	0	0	0	0	0	0	0	0	0	0	0	0
0	0	0	0	0	0	0	0	0	0	0	0	0	0	0	0	0	0	0	0	0	0	0	0	0	0	0	0	0	0	0	0	0	0	0	0	0	0	0	0	0	0	0	0	0	0	0	0	0	0
0	0	0	0	0	0	0	0	0	0	0	0	0	0	0	0	0	0	0	0	0	0	0	0	0	0	0	0	0	0	0	0	0	0	0	0	0	0	0	0	0	0	0	0	0	0	0	0	0	0
0	0	0	0	0	0	0	0	0	0	0	0	0	0	0	0	0	0	0	0	0	0	0	0	0	0	0	0	0	0	0	0	0	0	0	0	0	0	0	0	0	0	0	0	0	0	0	0	0	0
0	0	0	0	0	0	0	0	0	0	0	0	0	0	0	0	0	0	0	0	0	0	0	0	0	0	0	0	0	0	0	0	0	0	0	0	0	0	0	0	0	0	0	0	0	0	0	0	0	0
0	0	0	0	0	0	0	0	0	0	0	0	0	0	0	0	0	0	0	0	0	0	0	0	0	0	0	0	0	0	0	0	0	0	0	0	0	0	0	0	0	0	0	0	0	0	0	0	0	0
0	0	0	0	0	0	0	0	0	0	0	0	0	0	0	0	0	0	0	0	0	0	0	0	0	0	0	0	0	0	0	0	0	0	0	0	0	0	0	0	0	0	0	0	0	0	0	0	0	0
0	0	0	0	0	0	0	0	0	0	0	0	0	0	0	0	0	0	0	0	0	0	0	0	0	0	0	0	0	0	0	0	0	0	0	0	0	0	0	0	0	0	0	0	0	0	0	0	0	0
0	0	0	0	0	0	0	0	0	0	0	0	0	0	0	0	0	0	0	0	0	0	0	0	0	0	0	0	0	0	0	0	0	0	0	0	0	0	0	0	0	0	0	0	0	0	0	0	0	0
0	0	0	0	0	0	0	0	0	0	0	0	0	0	0	0	0	0	0	0	0	0	0	0	0	0	0	0	0	0	0	0	0	0	0	0	0	0	0	0	0	0	0	0	0	0	0	0	0	0
0	0	0	0	0	0	0	0	0	0	0	0	0	0	0	0	0	0	0	0	0	0	0	0	0	0	0	0	0	0	0	0	0	0	0	0	0	0	0	0	0	0	0	0	0	0	0	0	0	0
0	0	0	0	0	0	0	0	0	0	0	0	0	0	0	0	0	0	0	0	0	0	0	0	0	0	0	0	0	0	0	0	0	0	0	0	0	0	0	0	0	0	0	0	0	0	0	0	0	0
0	0	0	0	0	0	0	0	0	0	0	0	0	0	0	0	0	0	0	0	0	0	0	0	0	0	0	0	0	0	0	0	0	0	0	0	0	0	0	0	0	0	0	0	0	0	0	0	0	0
0	0	0	0	0	0	0	0	0	0	0	0	0	0	0	0	0	0	0	0	0	0	0	0	0	0	0	0	0	0	0	0	0	0	0	0	0	0	0	0	0	0	0	0	0	0	0	0	0	0
0	0	0	0	0	0	0	0	0	0	0	0	0	0	0	0	0	0	0	0	0	0	0	0	0	0	0	0	0	0	0	0	0	0	0	0	0	0	0	0	0	0	0	0	0	0	0	0	0	0
0	0	0	0	0	0	0	0	0	0	0	0	0	0	0	0	0	0	0	0	0	0	0	0	0	0	0	0	0	0	0	0	0	0	0	0	0	0	0	0	0	0	0	0	0	0	0	0	0	0
0	0	0	0	0	0	0	0	0	0	0	0	0	0	0	0	0	0	0	0	0	0	0	0	0	0	0	0	0	0	0	0	0	0	0	0	0	0	0	0	0	0	0	0	0	0	0	0	0	0
0	0	0	0	0	0	0	0	0	0	0	0	0	0	0	0	0	0	0	0	0	0	0	0	0	0	0	0	0	0	0	0	0	0	0	0	0	0	0	0	0	0	0	0	0	0	0	0	0	0
0	0	0	0	0	0	0	0	0	0	0	0	0	0	0	0	0	0	0	0	0	0	0	0	0	0	0	0	0	0	0	0	0	0	0	0	0	0	0	0	0	0	0	0	0	0	0	0	0	0
0	0	0	0	0	0	0	0	0	0	0	0	0	0	0	0	0	0	0	0	0	0	0	0	0	0	0	0	0	0	0	0	0	0	0	0	0	0	0	0	0	0	0	0	0	0	0	0	0	0
0	0	0	0	0	0	0	0	0	0	0	0	0	0	0	0	0	0	0	0	0	0	0	0	0	0	0	0	0	0	0	0	0	0	0	0	0	0	0	0	0	0	0	0	0	0	0	0	0	0
0	0	0	0	0	0	0	0	0	0	0	0	0	0	0	0	0	0	0	0	0	0	0	0	0	0	0	0	0	0	0	0	0	0	0	0	0	0	0	0	0	0	0	0	0	0	0	0	0	0
0	0	0	0	0	0	0	0	0	0	0	0	0	0	0	0	0	0	0	0	0	0	0	0	0	0	0	0	0	0	0	0	0	0	0	0	0	0	0	0	0	0	0	0	0	0	0	0	0	0
0	0	0	0	0	0	0	0	0	0	0	0	0	0	0	0	0	0	0	0	0	0	0	0	0	0	0	0	0	0	0	0	0	0	0	0	0	0	0	0	0	0	0	0	0	0	0	0	0	0
0	0	0	0	0	0	0	0	0	0	0	0	0	0	0	0	0	0	0	0	0	0	0	0	0	0	0	0	0	0	0	0	0	0	0	0	0	0	0	0	0	0	0	0	0	0	0	0	0	0
0	0	0	0	0	0	0	0	0	0	0	0	0	0	0	0	0	0	0	0	0	0	0	0	0	0	0	0	0	0	0	0	0	0	0	0	0	0	0	0	0	0	0	0	0	0	0	0	0	0
0	0	0	0	0	0	0	0	0	0	0	0	0	0	0	0	0	0	0	0	0	0	0	0	0	0	0	0	0	0	0	0	0	0	0	0	0	0	0	0	0	0	0	0	0	0	0	0	0	0
0	0	0	0	0	0	0	0	0	0	0	0	0	0	0	0	0	0	0	0	0	0	0	0	0	0	0	0	0	0	0	0	0	0	0	0	0	0	0	0	0	0	0	0	0	0	0	0	0	0
0	0	0	0	0	0	0	0	0	0	0	0	0	0	0	0	0	0	0	0	0	0	0	0	0	0	0	0	0	0	0	0	0	0	0	0	0	0	0	0	0	0	0	0	0	0	0	0	0	0
0	0	0	0	0	0	0	0	0	0	0	0	0	0	0	0	0	0	0	0	0	0	0	0	0	0	0	0	0	0	0	0	0	0	0	0	0	0	0	0	0	0	0	0	0	0	0	0	0	0
0	0	0	0	0	0	0	0	0	0	0	0	0	0	0	0	0	0	0	0	0	0	0	0	0	0	0	0	0	0	0	0	0	0	0	0	0	0	0	0	0	0	0	0	0	0	0	0	0	0
0	0	0	0	0	0	0	0	0	0	0	0	0	0	0	0	0	0	0	0	0	0	0	0	0	0	0	0	0	0	0	0	0	0	0	0	0	0	0	0	0	0	0	0	0	0	0	0	0	0
0	0	0	0	0	0	0	0	0	0	0	0	0	0	0	0	0	0	0	0	0	0	0	0	0	0	0	0	0	0	0	0	0	0	0	0	0	0	0	0	0	0	0	0	0	0	0	0	0	0
0	0	0	0	0	0	0	0	0	0	0	0	0	0	0	0	0	0	0	0	0	0	0	0	0	0	0	0	0	0	0	0	0	0	0	0	0	0	0	0	0	0	0	0	0	0	0	0	0	0
0	0	0	0	0	0	0	0	0	0	0	0	0	0	0	0	0	0	0	0	0	0	0	0	0	0	0	0	0	0	0	0	0	0	0	0	0	0	0	0	0	0	0	0	0	0	0	0	0	0
0	0	0	0	0	0	0	0	0	0	0	0	0	0	0	0	0	0	0	0	0	0	0	0	0	0	0	0	0	0	0	0	0	0	0	0	0	0	0	0	0	0	0	0	0	0	0	0	0	0
0	0	0	0	0	0	0	0	0	0	0	0	0	0	0	0	0	0	0	0	0	0	0	0	0	0	0	0	0	0	0	0	0	0	0	0	0	0	0	0	0	0	0	0	0	0	0	0	0	0
0	0	0	0	0	0	0	0	0	0	0	0	0	0	0	0	0	0	0	0	0	0	0	0	0	0	0	0	0	0	0	0	0	0	0	0	0	0	0	0	0	0	0	0	0	0	0	0	0	0
0	0	0	0	0	0	0	0	0	0	0	0	0	0	0	0	0	0	0	0	0	0	0	0	0	0	0	0	0	0	0	0	0	0	0	0	0	0	0	0	0	0	0	0	0	0	0	0	0	0
0	0	0	0	0	0	0	0	0	0	0	0	0	0	0	0	0	0	0	0	0	0	0	0	0	0	0	0	0	0	0	0	0	0	0	0	0	0	0	0	0	0	0	0	0	0	0	0	0	0
0	0	0	0	0	0	0	0	0	0	0	0	0	0	0	0	0	0	0	0	0	0	0	0	0	0	0	0	0	0	0	0	0	0	0	0	0	0	0	0	0	0	0	0	0	0	0	0	0	0
0	0	0	0	0	0	0	0	0	0	0	0	0	0	0	0	0	0	0	0	0	0	0	0	0	0	0	0	0	0	0	0	0	0	0	0	0	0	0	0	0	0	0	0	0	0	0	0	0	0
0	0	0	0	0	0	0	0	0	0	0	0	0	0	0	0	0	0	0	0	0	0	0	0	0	0	0	0	0	0	0	0	0	0	0	0	0	0	0	0	0	0	0	0	0	0	0	0	0	0
0	0	0	0	0	0	0	0	0	0	0	0	0	0	0	0	0	0	0	0	0	0	0	0	0	0	0	0	0	0	0	0	0	0	0	0	0	0	0	0	0	0	0	0	0	0	0	0	0	0
0	0	0	0	0	0	0	0	0	0	0	0	0	0	0	0	0	0	0	0	0	0	0	0	0	0	0	0	0	0	0	0	0	0	0	0	0	0	0	0	0	0	0	0	0	0	0	0	0	0
0	0	0	0	0	0	0	0	0	0	0	0	0	0	0	0	0	0	0	0	0	0	0	0	0	0	0	0	0	0	0	0	0	0	0	0	0	0	0	0	0	0	0	0	0	0	0	0	0	0
0	0	0	0	0	0	0	0	0	0	0	0	0	0	0	0	0	0	0	0	0	0	0	0	0	0	0	0	0	0	0	0	0	0	0	0	0	0	0	0	0	0	0	0	0	0	0	0	0	0
0	0	0	0	0	0	0	0	0	0	0	0	0	0	0	0	0	0	0	0	0	0	0	0	0	0	0	0	0	0	0	0	0	0	0	0	0	0	0	0	0	0	0	0	0	0	0	0	0	0
0	0	0	0	0	0	0	0	0	0	0	0	0	0	0	0	0	0	0	0	0	0	0	0	0	0	0	0	0	0	0	0	0	0	0	0	0	0	0	0	0	0	0	0	0	0	0	0	0	0
0	0	0	0	0	0	0	0	0	0	0	0	0	0	0	0	0	0	0	0	0	0	0	0	0	0	0	0	0	0	0	0	0	0	0	0	0	0	0	0	0	0	0	0	0	0	0	0	0	0
0	0	0	0	0	0	0	0	0	0	0	0	0	0	0	0	0	0	0	0	0	0	0	0	0	0	0	0	0	0	0	0	0	0	0	0	0	0	0	0	0	0	0	0	0	0	0	0	0	0
0	0	0	0	0	0	0	0	0	0	0	0	0	0	0	0	0	0	0	0	0	0	0	0	0	0	0	0	0	0	0	0	0	0	0	0	0	0	0	0	0	0	0	0	0	0	0	0	0	0
0	0	0	0	0	0	0	0	0	0	0	0	0	0	0	0	0	0	0	0	0	0	0	0	0	0	0	0	0	0	0	0	0	0	0	0	0	0	0	0	0	0	0	0	0	0	0	0	0	0
0	0	0	0	0	0	0	0	0	0	0	0	0	0	0	0	0	0	0	0	0	0	0	0	0	0	0	0	0	0	0	0	0	0	0	0	0	0	0	0	0	0	0	0	0	0	0	0	0	0
0	0	0	0	0	0	0	0	0	0	0	0	0	0	0	0	0	0	0	0	0	0	0	0	0	0	0	0	0	0	0	0	0	0	0	0	0	0	0	0	0	0	0	0	0	0	0	0	0	0
0	0	0	0	0	0	0	0	0	0	0	0	0	0	0	0	0	0	0	0	0	0	0	0	0	0	0	0	0	0	0	0	0	0	0	0	0	0	0	0	0	0	0	0	0	0	0	0	0	0
0	0	0	0	0	0	0	0	0	0	0	0	0	0	0	0	0	0	0	0	0	0	0	0	0	0	0	0	0	0	0	0	0	0	0	0	0	0	0	0	0	0	0	0	0	0	0	0	0	0
0	0	0	0	0	0	0	0	0	0	0	0	0	0	0	0	0	0	0	0	0	0	0	0	0	0	0	0	0	0	0	0	0	0	0	0	0	0	0	0	0	0	0	0	0	0	0	0	0	0
0	0	0	0	0	0	0	0	0	0	0	0	0	0	0	0	0	0	0	0	0	0	0	0	0	0	0	0	0	0	0	0	0	0	0	0	0	0	0	0	0	0	0	0	0	0	0	0	0	0
0	0	0	0	0	0	0	0	0	0	0	0	0	0	0	0	0	0	0	0	0	0	0	0	0	0	0	0	0	0	0	0	0	0	0	0	0	0	0	0	0	0	0	0	0	0	0	0	0	0
0	0	0	0	0	0	0	0	0	0	0	0	0	0	0	0	0	0	0	0	0	0	0	0	0	0	0	0	0	0	0	0	0	0	0	0	0	0	0	0	0	0	0	0	0	0	0	0	0	0
0	0	0	0	0	0	0	0	0	0	0	0	0	0	0	0	0	0	0	0	0	0	0	0	0	0	0	0	0	0	0	0	0	0	0	0	0	0	0	0	0	0	0	0	0	0	0	0	0	0
0	0	0	0	0	0	0	0	0	0	0	0	0	0	0	0	0	0	0	0	0	0	0	0	0	0	0	0	0	0	0	0	0	0	0	0	0	0	0	0	0	0	0	0	0	0	0	0	0	0
0	0	0	0	0	0	0	0	0	0	0	0	0	0	0	0	0	0	0	0	0	0	0	0	0	0	0	0	0	0	0	0	0	0	0	0	0	0	0	0	0	0	0	0	0	0	0	0	0	0
0	0	0	0	0	0	0	0	0	0	0	0	0	0	0	0	0	0	0	0	0	0	0	0	0	0	0	0	0	0	0	0	0	0	0	0	0	0	0	0	0	0	0	0	0	0	0	0	0	0
0	0	0	0	0	0	0	0	0	0	0	0	0	0	0	0	0	0	0	0	0	0	0	0	0	0	0	0	0	0	0	0	0	0	0	0	0	0	0	0	0	0	0	0	0	0	0	0	0	0
0	0	0	0	0	0	0	0	0	0	0	0	0	0	0	0	0	0	0	0	0	0	0	0	0	0	0	0	0	0	0	0	0	0	0	0	0	0	0	0	0	0	0	0	0	0	0	0	0	0
0	0	0	0	0	0	0	0	0	0	0	0	0	0	0	0	0	0	0	0	0	0	0	0	0	0	0	0	0	0	0	0	0	0	0	0	0	0	0	0	0	0	0	0	0	0	0	0	0	0
0	0	0	0	0	0	0	0	0	0	0	0	0	0	0	0	0	0	0	0	0	0	0	0	0	0	0	0	0	0	0	0	0	0	0	0	0	0	0	0	0	0	0	0	0	0	0	0	0	0
0	0	0	0	0	0	0	0	0	0	0	0	0	0	0	0	0	0	0	0	0	0	0	0	0	0	0	0	0	0	0	0	0	0	0	0	0	0	0	0	0	0	0	0	0	0	0	0	0	0
0	0	0	0	0	0	0	0	0	0	0	0	0	0	0	0	0	0	0	0	0	0	0	0	0	0	0	0	0	0	0	0	0	0	0	0	0	0	0	0	0	0	0	0	0	0	0	0	0	0
0	0	0	0	0	0	0	0	0	0	0	0	0	0	0	0	0	0	0	0	0	0	0	0	0	0	0	0	0	0	0	0	0	0	0	0	0	0	0	0	0	0	0	0	0	0	0	0	0	0
0	0	0	0	0	0	0	0	0	0	0	0	0	0	0	0	0	0	0	0	0	0	0	0	0	0	0	0	0	0	0	0	0	0	0	0	0	0	0	0	0	0	0	0	0	0	0	0	0	0
0	0	0	0	0	0	0	0	0	0	0	0	0	0	0	0	0	0	0	0	0	0	0	0	0	0	0	0	0	0	0	0	0	0	0	0	0	0	0	0	0	0	0	0	0	0	0	0	0	0
0	0	0	0	0	0	0	0	0	0	0	0	0	0	0	0	0	0	0	0	0	0	0	0	0	0	0	0	0	0	0	0	0	0	0	0	0	0	0	0	0	0	0	0	0	0	0	0	0	0
0	0	0	0	0	0	0	0	0	0	0	0	0	0	0	0	0	0	0	0	0	0	0	0	0	0	0	0	0	0	0	0	0	0	0	0	0	0	0	0	0	0	0	0	0	0	0	0	0	0
0	0	0	0	0	0	0	0	0	0	0	0	0	0	0	0	0	0	0	0	0	0	0	0	0	0	0	0	0	0	0	0	0	0	0	0	0	0	0	0	0	0	0	0	0	0	0	0	0	0
0	0	0	0	0	0	0	0	0	0	0	0	0	0	0	0	0	0	0	0	0	0	0	0	0	0	0	0	0	0	0	0	0	0	0	0	0	0	0	0	0	0	0	0	0	0	0	0	0	0
0	0	0	0	0	0	0	0	0	0	0	0	0	0	0	0	0	0	0	0	0	0	0	0	0	0	0	0	0	0	0	0	0	0	0	0	0	0	0	0	0	0	0	0	0	0	0	0	0	0
0	0	0	0	0	0	0	0	0	0	0	0	0	0	0	0	0	0	0	0	0	0	0	0	0	0	0	0	0	0	0	0	0	0	0	0	0	0	0	0	0	0	0	0	0	0	0	0	0	0
0	0	0	0	0	0	0	0	0	0	0	0	0	0	0	0	0	0	0	0	0	0	0	0	0	0	0	0	0	0	0	0	0	0	0	0	0	0	0	0	0	0	0	0	0	0	0	0	0	0
0	0	0	0	0	0	0	0	0	0	0	0	0	0	0	0	0	0	0	0	0	0	0	0	0	0	0	0	0	0	0	0	0	0	0	0	0	0	0	0	0	0	0	0	0	0	0	0	0	0
0	0	0	0	0	0	0	0	0	0	0	0	0	0	0	0	0	0	0	0	0	0	0	0	0	0	0	0	0	0	0	0	0	0	0	0	0	0	0	0	0	0	0	0	0	0	0	0	0	0
0	0	0	0	0	0	0	0	0	0	0	0	0	0	0	0	0	0	0	0	0	0	0	0	0	0	0	0	0	0	0	0	0	0	0	0	0	0	0	0	0	0	0	0	0	0	0	0	0	0
0	0	0	0	0	0	0	0	0	0	0	0	0	0	0	0	0	0	0	0	0	0	0	0	0	0	0	0	0	0	0	0	0	0	0	0	0	0	0	0	0	0	0	0	0	0	0	0	0	0
0	0	0	0	0	0	0	0	0	0	0	0	0	0	0	0	0	0	0	0	0	0	0	0	0	0	0	0	0	0	0	0	0	0	0	0	0	0	0	0	0	0	0	0	0	0	0	0	0	0
0	0	0	0	0	0	0	0	0	0	0	0	0	0	0	0	0	0	0	0	0	0	0	0	0	0	0	0	0	0	0	0	0	0	0	0	0	0	0	0	0	0	0	0	0	0	0	0	0	0
PAA-Cu
0.00878	0.00878	0.00879	0.00879	0.0088	0.0088	0.00881	0.00881	0.00882	0.00882	0.00883	0.00883	0.00884	0.00884	0.00885	0.00885	0.00886	0.00886	0.00887	0.00887	0.00887	0.00888	0.00888	0.00889	0.00889	0.0089	0.0089	0.00891	0.00891	0.00891	0.00892	0.00892	0.00893	0.00893	0.00894	0.00894	0.00895	0.00895	0.00895	0.00896	0.00896	0.00897	0.00897	0.00897	0.00898	0.00898	0.00899	0.00899	0.00899	0.009
0.01159	0.0116	0.01161	0.01162	0.01163	0.01164	0.01165	0.01166	0.01167	0.01168	0.01169	0.0117	0.01171	0.01172	0.01173	0.01174	0.01175	0.01176	0.01177	0.01178	0.01179	0.0118	0.01181	0.01182	0.01183	0.01184	0.01185	0.01186	0.01187	0.01188	0.01189	0.01189	0.0119	0.01191	0.01192	0.01193	0.01194	0.01195	0.01196	0.01197	0.01198	0.01198	0.01199	0.012	0.01201	0.01202	0.01203	0.01204	0.01204	0.01205
0.01392	0.01394	0.01396	0.01398	0.014	0.01402	0.01403	0.01405	0.01407	0.01409	0.01411	0.01412	0.01414	0.01416	0.01418	0.0142	0.01421	0.01423	0.01425	0.01427	0.01428	0.0143	0.01432	0.01433	0.01435	0.01437	0.01438	0.0144	0.01442	0.01443	0.01445	0.01447	0.01448	0.0145	0.01452	0.01453	0.01455	0.01456	0.01458	0.01459	0.01461	0.01463	0.01464	0.01466	0.01467	0.01469	0.0147	0.01472	0.01473	0.01475
0.01549	0.01552	0.01555	0.01558	0.0156	0.01563	0.01566	0.01569	0.01572	0.01574	0.01577	0.0158	0.01583	0.01585	0.01588	0.01591	0.01593	0.01596	0.01599	0.01601	0.01604	0.01607	0.01609	0.01612	0.01615	0.01617	0.0162	0.01622	0.01625	0.01627	0.0163	0.01632	0.01635	0.01637	0.0164	0.01642	0.01645	0.01647	0.01649	0.01652	0.01654	0.01657	0.01659	0.01661	0.01664	0.01666	0.01668	0.0167	0.01673	0.01675
0.01612	0.01616	0.0162	0.01624	0.01628	0.01632	0.01635	0.01639	0.01643	0.01647	0.0165	0.01654	0.01658	0.01661	0.01665	0.01669	0.01672	0.01676	0.0168	0.01683	0.01687	0.0169	0.01694	0.01697	0.01701	0.01704	0.01708	0.01711	0.01715	0.01718	0.01722	0.01725	0.01728	0.01732	0.01735	0.01738	0.01742	0.01745	0.01748	0.01752	0.01755	0.01758	0.01761	0.01764	0.01768	0.01771	0.01774	0.01777	0.0178	0.01783
0.01581	0.01586	0.01591	0.01595	0.016	0.01604	0.01609	0.01613	0.01618	0.01623	0.01627	0.01631	0.01636	0.0164	0.01645	0.01649	0.01654	0.01658	0.01662	0.01667	0.01671	0.01675	0.01679	0.01684	0.01688	0.01692	0.01696	0.017	0.01705	0.01709	0.01713	0.01717	0.01721	0.01725	0.01729	0.01733	0.01737	0.01741	0.01745	0.01749	0.01753	0.01757	0.01761	0.01764	0.01768	0.01772	0.01776	0.01779	0.01783	0.01787
0.01473	0.01478	0.01483	0.01488	0.01493	0.01498	0.01503	0.01507	0.01512	0.01517	0.01522	0.01526	0.01531	0.01536	0.0154	0.01545	0.0155	0.01554	0.01559	0.01564	0.01568	0.01573	0.01577	0.01582	0.01586	0.01591	0.01595	0.01599	0.01604	0.01608	0.01613	0.01617	0.01621	0.01625	0.0163	0.01634	0.01638	0.01642	0.01646	0.01651	0.01655	0.01659	0.01663	0.01667	0.01671	0.01675	0.01679	0.01683	0.01686	0.0169
0.01327	0.01332	0.01336	0.01341	0.01345	0.0135	0.01354	0.01359	0.01363	0.01367	0.01372	0.01376	0.0138	0.01385	0.01389	0.01393	0.01397	0.01401	0.01406	0.0141	0.01414	0.01418	0.01422	0.01426	0.0143	0.01434	0.01438	0.01442	0.01445	0.01449	0.01453	0.01457	0.01461	0.01464	0.01468	0.01472	0.01475	0.01479	0.01483	0.01486	0.0149	0.01493	0.01497	0.015	0.01503	0.01507	0.0151	0.01513	0.01517	0.0152
0.01208	0.01212	0.01216	0.01219	0.01223	0.01226	0.0123	0.01233	0.01237	0.0124	0.01243	0.01247	0.0125	0.01253	0.01256	0.0126	0.01263	0.01266	0.01269	0.01272	0.01275	0.01278	0.0128	0.01283	0.01286	0.01289	0.01291	0.01294	0.01296	0.01299	0.01301	0.01304	0.01306	0.01309	0.01311	0.01313	0.01315	0.01318	0.0132	0.01322	0.01324	0.01326	0.01328	0.0133	0.01331	0.01333	0.01335	0.01337	0.01338	0.0134
0.01194	0.01197	0.012	0.01204	0.01207	0.0121	0.01213	0.01215	0.01218	0.01221	0.01224	0.01226	0.01229	0.01231	0.01234	0.01236	0.01238	0.0124	0.01243	0.01245	0.01247	0.01248	0.0125	0.01252	0.01254	0.01255	0.01257	0.01258	0.0126	0.01261	0.01262	0.01263	0.01264	0.01265	0.01266	0.01267	0.01268	0.01268	0.01269	0.01269	0.0127	0.0127	0.0127	0.0127	0.01271	0.01271	0.0127	0.0127	0.0127	0.0127
0.01321	0.01325	0.0133	0.01334	0.01338	0.01343	0.01347	0.01351	0.01355	0.01359	0.01363	0.01366	0.0137	0.01373	0.01377	0.0138	0.01383	0.01386	0.01389	0.01392	0.01395	0.01398	0.01401	0.01403	0.01406	0.01408	0.0141	0.01412	0.01414	0.01416	0.01418	0.0142	0.01421	0.01423	0.01424	0.01425	0.01427	0.01428	0.01428	0.01429	0.0143	0.0143	0.01431	0.01431	0.01431	0.01431	0.01431	0.01431	0.01431	0.01431
0.01554	0.01561	0.01569	0.01577	0.01584	0.01592	0.01599	0.01607	0.01614	0.01621	0.01628	0.01635	0.01642	0.01649	0.01656	0.01662	0.01669	0.01675	0.01682	0.01688	0.01694	0.017	0.01706	0.01712	0.01717	0.01723	0.01728	0.01734	0.01739	0.01744	0.01749	0.01754	0.01759	0.01763	0.01768	0.01772	0.01777	0.01781	0.01785	0.01789	0.01792	0.01796	0.01799	0.01803	0.01806	0.01809	0.01812	0.01815	0.01818	0.0182
0.0183	0.01842	0.01855	0.01867	0.0188	0.01892	0.01904	0.01917	0.01929	0.01941	0.01953	0.01965	0.01977	0.01989	0.02001	0.02012	0.02024	0.02035	0.02047	0.02058	0.02069	0.0208	0.02092	0.02102	0.02113	0.02124	0.02135	0.02145	0.02156	0.02166	0.02176	0.02186	0.02196	0.02206	0.02216	0.02226	0.02235	0.02245	0.02254	0.02263	0.02272	0.02281	0.0229	0.02298	0.02307	0.02315	0.02323	0.02331	0.02339	0.02347
0.021	0.02119	0.02137	0.02155	0.02174	0.02192	0.0221	0.02228	0.02246	0.02265	0.02283	0.02301	0.02319	0.02337	0.02355	0.02373	0.0239	0.02408	0.02426	0.02444	0.02461	0.02479	0.02496	0.02514	0.02531	0.02549	0.02566	0.02583	0.026	0.02617	0.02634	0.0265	0.02667	0.02684	0.027	0.02717	0.02733	0.02749	0.02765	0.02781	0.02797	0.02812	0.02828	0.02843	0.02859	0.02874	0.02889	0.02904	0.02918	0.02933
0.02336	0.02361	0.02385	0.0241	0.02435	0.02459	0.02484	0.02509	0.02534	0.02558	0.02583	0.02608	0.02633	0.02658	0.02683	0.02707	0.02732	0.02757	0.02782	0.02807	0.02832	0.02857	0.02881	0.02906	0.02931	0.02956	0.0298	0.03005	0.0303	0.03054	0.03079	0.03103	0.03127	0.03152	0.03176	0.032	0.03224	0.03248	0.03272	0.03296	0.0332	0.03343	0.03367	0.0339	0.03413	0.03437	0.0346	0.03483	0.03505	0.03528
0.02522	0.02553	0.02584	0.02615	0.02646	0.02677	0.02709	0.0274	0.02772	0.02804	0.02835	0.02867	0.02899	0.02931	0.02964	0.02996	0.03028	0.0306	0.03093	0.03125	0.03158	0.03191	0.03223	0.03256	0.03289	0.03321	0.03354	0.03387	0.0342	0.03452	0.03485	0.03518	0.03551	0.03584	0.03616	0.03649	0.03682	0.03714	0.03747	0.03779	0.03812	0.03844	0.03877	0.03909	0.03941	0.03973	0.04005	0.04037	0.04069	0.04101
0.02652	0.02689	0.02726	0.02763	0.02801	0.02838	0.02876	0.02915	0.02953	0.02992	0.0303	0.03069	0.03109	0.03148	0.03188	0.03227	0.03267	0.03307	0.03347	0.03388	0.03428	0.03469	0.03509	0.0355	0.03591	0.03632	0.03673	0.03715	0.03756	0.03797	0.03839	0.0388	0.03922	0.03964	0.04005	0.04047	0.04089	0.04131	0.04172	0.04214	0.04256	0.04298	0.0434	0.04381	0.04423	0.04465	0.04506	0.04548	0.04589	0.04631
0.02725	0.02768	0.02811	0.02854	0.02898	0.02942	0.02986	0.03031	0.03075	0.03121	0.03166	0.03212	0.03258	0.03305	0.03351	0.03398	0.03446	0.03493	0.03541	0.03589	0.03637	0.03686	0.03735	0.03784	0.03833	0.03882	0.03932	0.03982	0.04032	0.04082	0.04132	0.04183	0.04233	0.04284	0.04335	0.04386	0.04437	0.04488	0.0454	0.04591	0.04642	0.04694	0.04746	0.04797	0.04849	0.04901	0.04952	0.05004	0.05056	0.05108
0.02747	0.02795	0.02843	0.02892	0.02941	0.0299	0.0304	0.03091	0.03142	0.03193	0.03245	0.03298	0.0335	0.03403	0.03457	0.03511	0.03565	0.0362	0.03675	0.03731	0.03786	0.03843	0.03899	0.03956	0.04013	0.04071	0.04129	0.04187	0.04246	0.04305	0.04364	0.04423	0.04483	0.04543	0.04603	0.04663	0.04724	0.04784	0.04845	0.04906	0.04968	0.05029	0.05091	0.05153	0.05214	0.05276	0.05338	0.05401	0.05463	0.05525
0.02723	0.02775	0.02828	0.02882	0.02936	0.0299	0.03046	0.03101	0.03158	0.03215	0.03272	0.03331	0.03389	0.03449	0.03508	0.03569	0.0363	0.03691	0.03753	0.03816	0.03879	0.03942	0.04006	0.04071	0.04136	0.04202	0.04267	0.04334	0.04401	0.04468	0.04536	0.04604	0.04672	0.04741	0.0481	0.0488	0.0495	0.0502	0.0509	0.05161	0.05232	0.05304	0.05375	0.05447	0.05519	0.05592	0.05664	0.05737	0.0581	0.05883
0.02661	0.02717	0.02773	0.02831	0.02889	0.02948	0.03008	0.03068	0.03129	0.03191	0.03254	0.03317	0.03382	0.03446	0.03512	0.03578	0.03645	0.03713	0.03781	0.0385	0.0392	0.0399	0.04061	0.04133	0.04206	0.04278	0.04352	0.04426	0.04501	0.04576	0.04652	0.04729	0.04806	0.04883	0.04961	0.0504	0.05119	0.05199	0.05279	0.05359	0.0544	0.05521	0.05603	0.05685	0.05767	0.0585	0.05933	0.06016	0.061	0.06184
0.02567	0.02626	0.02686	0.02746	0.02808	0.02871	0.02934	0.02998	0.03064	0.0313	0.03197	0.03265	0.03334	0.03403	0.03474	0.03545	0.03618	0.03691	0.03765	0.0384	0.03916	0.03993	0.0407	0.04148	0.04228	0.04308	0.04388	0.0447	0.04552	0.04635	0.04719	0.04804	0.04889	0.04975	0.05061	0.05149	0.05237	0.05325	0.05414	0.05504	0.05595	0.05686	0.05777	0.05869	0.05962	0.06055	0.06148	0.06242	0.06337	0.06431
0.02448	0.02509	0.02572	0.02635	0.02699	0.02764	0.02831	0.02898	0.02967	0.03036	0.03107	0.03179	0.03252	0.03325	0.034	0.03476	0.03554	0.03632	0.03711	0.03791	0.03873	0.03955	0.04038	0.04123	0.04208	0.04294	0.04382	0.0447	0.04559	0.0465	0.04741	0.04833	0.04926	0.0502	0.05115	0.05211	0.05307	0.05405	0.05503	0.05602	0.05702	0.05802	0.05903	0.06005	0.06108	0.06211	0.06315	0.0642	0.06525	0.06631
0.02311	0.02373	0.02437	0.02502	0.02568	0.02635	0.02704	0.02773	0.02844	0.02917	0.0299	0.03065	0.03141	0.03219	0.03297	0.03377	0.03458	0.0354	0.03624	0.03709	0.03795	0.03882	0.03971	0.04061	0.04152	0.04244	0.04337	0.04432	0.04528	0.04625	0.04723	0.04822	0.04923	0.05024	0.05127	0.05231	0.05336	0.05442	0.05548	0.05656	0.05765	0.05875	0.05986	0.06098	0.0621	0.06324	0.06438	0.06553	0.06669	0.06786
0.02159	0.02222	0.02287	0.02352	0.0242	0.02488	0.02558	0.02629	0.02702	0.02776	0.02852	0.02929	0.03007	0.03087	0.03169	0.03252	0.03336	0.03422	0.03509	0.03598	0.03688	0.0378	0.03873	0.03967	0.04063	0.04161	0.0426	0.0436	0.04462	0.04565	0.04669	0.04775	0.04883	0.04991	0.05101	0.05213	0.05325	0.05439	0.05555	0.05671	0.05789	0.05908	0.06028	0.06149	0.06272	0.06395	0.0652	0.06645	0.06772	0.069
0.01998	0.02061	0.02126	0.02192	0.02259	0.02328	0.02398	0.02471	0.02544	0.02619	0.02696	0.02775	0.02855	0.02937	0.0302	0.03105	0.03192	0.0328	0.0337	0.03462	0.03556	0.03651	0.03748	0.03846	0.03946	0.04048	0.04152	0.04257	0.04364	0.04473	0.04583	0.04695	0.04809	0.04924	0.05041	0.0516	0.0528	0.05401	0.05524	0.05649	0.05775	0.05903	0.06032	0.06163	0.06295	0.06428	0.06563	0.06699	0.06836	0.06975
0.01833	0.01894	0.01958	0.02023	0.0209	0.02159	0.02229	0.02301	0.02375	0.0245	0.02528	0.02607	0.02688	0.0277	0.02855	0.02941	0.0303	0.0312	0.03212	0.03306	0.03402	0.035	0.036	0.03701	0.03805	0.03911	0.04018	0.04128	0.04239	0.04353	0.04468	0.04585	0.04704	0.04826	0.04949	0.05074	0.052	0.05329	0.0546	0.05592	0.05726	0.05862	0.06	0.0614	0.06281	0.06424	0.06568	0.06714	0.06862	0.07011
0.01665	0.01725	0.01788	0.01851	0.01917	0.01984	0.02054	0.02125	0.02198	0.02273	0.0235	0.02429	0.02509	0.02592	0.02677	0.02764	0.02853	0.02944	0.03037	0.03133	0.0323	0.0333	0.03432	0.03536	0.03642	0.0375	0.03861	0.03974	0.04089	0.04206	0.04326	0.04448	0.04572	0.04698	0.04826	0.04957	0.0509	0.05225	0.05362	0.05502	0.05643	0.05787	0.05933	0.06081	0.06231	0.06383	0.06537	0.06693	0.06851	0.07011
0.01499	0.01557	0.01617	0.01679	0.01743	0.01808	0.01876	0.01946	0.02017	0.02091	0.02166	0.02244	0.02324	0.02406	0.02491	0.02577	0.02666	0.02757	0.02851	0.02946	0.03044	0.03145	0.03248	0.03353	0.03461	0.03571	0.03684	0.03799	0.03917	0.04037	0.0416	0.04286	0.04413	0.04544	0.04677	0.04813	0.04951	0.05091	0.05234	0.0538	0.05528	0.05679	0.05832	0.05988	0.06146	0.06307	0.06469	0.06635	0.06802	0.06972
0.01338	0.01393	0.0145	0.0151	0.01571	0.01634	0.01699	0.01766	0.01836	0.01907	0.01981	0.02057	0.02135	0.02216	0.02299	0.02384	0.02472	0.02562	0.02655	0.0275	0.02848	0.02948	0.03051	0.03157	0.03265	0.03377	0.0349	0.03607	0.03727	0.03849	0.03974	0.04102	0.04233	0.04366	0.04503	0.04642	0.04785	0.0493	0.05078	0.05229	0.05383	0.0554	0.05699	0.05862	0.06027	0.06195	0.06366	0.0654	0.06717	0.06896
0.01183	0.01235	0.0129	0.01346	0.01404	0.01464	0.01526	0.0159	0.01657	0.01726	0.01797	0.0187	0.01946	0.02024	0.02105	0.02188	0.02274	0.02363	0.02454	0.02548	0.02644	0.02744	0.02846	0.02951	0.03059	0.0317	0.03284	0.03401	0.03521	0.03644	0.0377	0.039	0.04032	0.04168	0.04307	0.04449	0.04595	0.04743	0.04895	0.0505	0.05209	0.05371	0.05536	0.05704	0.05876	0.06051	0.06229	0.0641	0.06595	0.06783
0.01037	0.01086	0.01137	0.01189	0.01244	0.013	0.01359	0.0142	0.01483	0.01549	0.01617	0.01687	0.0176	0.01835	0.01913	0.01993	0.02076	0.02162	0.02251	0.02343	0.02437	0.02534	0.02635	0.02738	0.02845	0.02955	0.03068	0.03184	0.03304	0.03427	0.03553	0.03683	0.03816	0.03952	0.04093	0.04236	0.04384	0.04535	0.04689	0.04848	0.0501	0.05175	0.05345	0.05518	0.05695	0.05875	0.06059	0.06247	0.06439	0.06634
0.00902	0.00947	0.00994	0.01042	0.01093	0.01146	0.01201	0.01258	0.01317	0.01379	0.01443	0.0151	0.01579	0.01651	0.01725	0.01802	0.01882	0.01964	0.0205	0.02138	0.0223	0.02324	0.02422	0.02523	0.02627	0.02735	0.02846	0.02961	0.03079	0.032	0.03326	0.03454	0.03587	0.03724	0.03864	0.04008	0.04156	0.04308	0.04464	0.04624	0.04788	0.04957	0.05129	0.05305	0.05486	0.0567	0.05859	0.06052	0.0625	0.06451
0.00777	0.00818	0.00861	0.00906	0.00953	0.01002	0.01052	0.01106	0.01161	0.01218	0.01278	0.01341	0.01406	0.01473	0.01544	0.01617	0.01693	0.01771	0.01853	0.01938	0.02026	0.02117	0.02211	0.02309	0.0241	0.02514	0.02622	0.02734	0.0285	0.02969	0.03092	0.03219	0.0335	0.03485	0.03624	0.03768	0.03915	0.04067	0.04223	0.04384	0.04549	0.04718	0.04892	0.0507	0.05253	0.05441	0.05633	0.0583	0.06031	0.06237
0.00665	0.00702	0.00741	0.00781	0.00824	0.00869	0.00915	0.00964	0.01015	0.01068	0.01124	0.01182	0.01243	0.01306	0.01372	0.0144	0.01512	0.01586	0.01663	0.01744	0.01827	0.01914	0.02004	0.02098	0.02195	0.02296	0.024	0.02508	0.02621	0.02737	0.02857	0.02981	0.03109	0.03241	0.03378	0.0352	0.03665	0.03816	0.03971	0.0413	0.04295	0.04464	0.04638	0.04817	0.05001	0.0519	0.05384	0.05583	0.05787	0.05996
0.00564	0.00597	0.00632	0.00669	0.00707	0.00748	0.0079	0.00835	0.00881	0.0093	0.00981	0.01034	0.0109	0.01149	0.0121	0.01274	0.01341	0.0141	0.01483	0.01558	0.01637	0.01719	0.01805	0.01894	0.01986	0.02083	0.02183	0.02286	0.02394	0.02506	0.02622	0.02742	0.02867	0.02996	0.0313	0.03268	0.03411	0.03558	0.03711	0.03869	0.04031	0.04199	0.04372	0.0455	0.04733	0.04922	0.05116	0.05316	0.05522	0.05733
0.00475	0.00504	0.00536	0.00568	0.00603	0.00639	0.00677	0.00717	0.00759	0.00804	0.0085	0.00899	0.0095	0.01004	0.0106	0.01119	0.01181	0.01245	0.01313	0.01384	0.01457	0.01534	0.01615	0.01699	0.01786	0.01877	0.01972	0.02071	0.02174	0.02281	0.02392	0.02508	0.02628	0.02753	0.02882	0.03016	0.03155	0.03299	0.03448	0.03602	0.03762	0.03927	0.04097	0.04273	0.04455	0.04642	0.04835	0.05034	0.05239	0.0545
0.00397	0.00423	0.0045	0.00479	0.0051	0.00542	0.00576	0.00612	0.0065	0.0069	0.00732	0.00776	0.00823	0.00872	0.00923	0.00977	0.01034	0.01093	0.01155	0.01221	0.01289	0.01361	0.01436	0.01514	0.01596	0.01682	0.01771	0.01865	0.01962	0.02064	0.0217	0.0228	0.02395	0.02514	0.02639	0.02768	0.02902	0.03041	0.03186	0.03336	0.03491	0.03652	0.03819	0.03991	0.0417	0.04354	0.04545	0.04742	0.04945	0.05155
0.0033	0.00352	0.00376	0.00402	0.00429	0.00457	0.00487	0.00519	0.00553	0.00589	0.00626	0.00666	0.00708	0.00752	0.00798	0.00848	0.00899	0.00953	0.01011	0.01071	0.01134	0.012	0.01269	0.01342	0.01418	0.01498	0.01582	0.01669	0.01761	0.01857	0.01957	0.02061	0.0217	0.02284	0.02403	0.02526	0.02655	0.02788	0.02928	0.03072	0.03222	0.03379	0.03541	0.03709	0.03883	0.04063	0.0425	0.04443	0.04643	0.0485
0.00272	0.00292	0.00312	0.00334	0.00358	0.00383	0.00409	0.00438	0.00467	0.00499	0.00532	0.00568	0.00605	0.00645	0.00687	0.00731	0.00778	0.00827	0.00879	0.00933	0.00991	0.01052	0.01116	0.01183	0.01253	0.01327	0.01405	0.01487	0.01572	0.01662	0.01755	0.01854	0.01956	0.02064	0.02176	0.02293	0.02416	0.02543	0.02677	0.02815	0.0296	0.0311	0.03266	0.03429	0.03597	0.03773	0.03955	0.04143	0.04339	0.04541
0.00223	0.0024	0.00258	0.00277	0.00297	0.00319	0.00342	0.00367	0.00393	0.0042	0.0045	0.00481	0.00515	0.0055	0.00587	0.00627	0.00669	0.00713	0.0076	0.0081	0.00862	0.00917	0.00975	0.01037	0.01101	0.0117	0.01241	0.01317	0.01396	0.01479	0.01567	0.01659	0.01755	0.01856	0.01961	0.02072	0.02188	0.02309	0.02435	0.02567	0.02705	0.02849	0.02999	0.03155	0.03317	0.03487	0.03662	0.03845	0.04035	0.04232
0.00182	0.00196	0.00211	0.00228	0.00245	0.00264	0.00284	0.00305	0.00328	0.00352	0.00378	0.00406	0.00435	0.00466	0.005	0.00535	0.00572	0.00612	0.00654	0.00698	0.00746	0.00796	0.00848	0.00904	0.00963	0.01026	0.01091	0.01161	0.01234	0.01311	0.01392	0.01477	0.01567	0.01661	0.0176	0.01863	0.01972	0.02086	0.02206	0.02331	0.02461	0.02598	0.02741	0.0289	0.03046	0.03208	0.03377	0.03553	0.03737	0.03927
0.00147	0.00159	0.00172	0.00186	0.00201	0.00217	0.00235	0.00253	0.00273	0.00294	0.00316	0.0034	0.00366	0.00394	0.00423	0.00454	0.00487	0.00522	0.0056	0.006	0.00642	0.00687	0.00735	0.00785	0.00839	0.00895	0.00955	0.01019	0.01086	0.01156	0.01231	0.0131	0.01393	0.0148	0.01572	0.01669	0.0177	0.01877	0.01989	0.02107	0.0223	0.0236	0.02495	0.02637	0.02785	0.0294	0.03101	0.0327	0.03446	0.0363
0.00119	0.00129	0.0014	0.00152	0.00164	0.00178	0.00193	0.00209	0.00226	0.00244	0.00263	0.00284	0.00307	0.0033	0.00356	0.00383	0.00413	0.00444	0.00477	0.00513	0.0055	0.00591	0.00633	0.00679	0.00727	0.00778	0.00832	0.0089	0.00951	0.01016	0.01084	0.01156	0.01233	0.01313	0.01398	0.01488	0.01583	0.01682	0.01787	0.01897	0.02013	0.02135	0.02262	0.02396	0.02536	0.02683	0.02837	0.02998	0.03166	0.03342
0.00095	0.00104	0.00113	0.00123	0.00133	0.00145	0.00158	0.00171	0.00186	0.00201	0.00218	0.00236	0.00255	0.00276	0.00299	0.00322	0.00348	0.00376	0.00405	0.00436	0.0047	0.00505	0.00544	0.00584	0.00627	0.00674	0.00723	0.00775	0.0083	0.00889	0.00951	0.01017	0.01087	0.01161	0.01239	0.01322	0.0141	0.01502	0.01599	0.01702	0.0181	0.01924	0.02044	0.0217	0.02302	0.02441	0.02587	0.02739	0.02899	0.03067
0.000757	0.000828	0.000905	0.000988	0.00108	0.00118	0.00128	0.0014	0.00152	0.00165	0.0018	0.00195	0.00212	0.0023	0.00249	0.0027	0.00292	0.00316	0.00342	0.0037	0.00399	0.00431	0.00465	0.00501	0.0054	0.00581	0.00625	0.00672	0.00722	0.00775	0.00831	0.00891	0.00955	0.01023	0.01094	0.01171	0.01251	0.01336	0.01427	0.01522	0.01622	0.01728	0.0184	0.01958	0.02082	0.02213	0.0235	0.02495	0.02646	0.02805
0.000601	0.000659	0.000723	0.000792	0.000868	0.00095	0.00104	0.00114	0.00124	0.00135	0.00148	0.00161	0.00175	0.00191	0.00207	0.00225	0.00245	0.00266	0.00288	0.00312	0.00338	0.00366	0.00396	0.00428	0.00462	0.00499	0.00538	0.0058	0.00625	0.00673	0.00724	0.00778	0.00836	0.00898	0.00963	0.01033	0.01107	0.01185	0.01268	0.01356	0.01449	0.01548	0.01652	0.01762	0.01878	0.02	0.02129	0.02265	0.02408	0.02558
0.000475	0.000523	0.000575	0.000632	0.000695	0.000763	0.000838	0.000918	0.00101	0.0011	0.00121	0.00132	0.00144	0.00157	0.00172	0.00187	0.00204	0.00222	0.00242	0.00263	0.00285	0.0031	0.00336	0.00364	0.00395	0.00427	0.00462	0.005	0.0054	0.00583	0.00629	0.00678	0.0073	0.00786	0.00845	0.00909	0.00976	0.01048	0.01124	0.01205	0.01291	0.01382	0.01479	0.01581	0.01689	0.01803	0.01924	0.02051	0.02185	0.02326
0.000373	0.000412	0.000455	0.000503	0.000554	0.000611	0.000673	0.00074	0.000814	0.000894	0.000982	0.00108	0.00118	0.00129	0.00142	0.00155	0.00169	0.00185	0.00202	0.0022	0.0024	0.00261	0.00284	0.00309	0.00336	0.00365	0.00396	0.00429	0.00465	0.00503	0.00544	0.00588	0.00635	0.00686	0.0074	0.00797	0.00859	0.00924	0.00994	0.01068	0.01147	0.01231	0.0132	0.01415	0.01515	0.01621	0.01734	0.01853	0.01978	0.02111
0.000292	0.000324	0.000359	0.000398	0.00044	0.000487	0.000538	0.000594	0.000656	0.000723	0.000796	0.000877	0.000964	0.00106	0.00116	0.00128	0.0014	0.00154	0.00168	0.00184	0.00201	0.0022	0.0024	0.00261	0.00285	0.0031	0.00338	0.00367	0.00399	0.00433	0.0047	0.00509	0.00552	0.00597	0.00646	0.00698	0.00753	0.00813	0.00877	0.00945	0.01017	0.01094	0.01176	0.01263	0.01356	0.01454	0.01559	0.01669	0.01787	0.01911
0.000227	0.000253	0.000282	0.000313	0.000348	0.000386	0.000429	0.000475	0.000526	0.000582	0.000643	0.000711	0.000785	0.000865	0.000954	0.00105	0.00116	0.00127	0.0014	0.00153	0.00168	0.00184	0.00201	0.0022	0.00241	0.00263	0.00287	0.00313	0.00341	0.00372	0.00404	0.0044	0.00477	0.00518	0.00562	0.00609	0.00659	0.00713	0.00771	0.00833	0.00899	0.0097	0.01045	0.01125	0.01211	0.01302	0.01399	0.01501	0.0161	0.01726
0.000176	0.000197	0.00022	0.000246	0.000274	0.000306	0.00034	0.000378	0.00042	0.000467	0.000518	0.000574	0.000636	0.000704	0.000778	0.00086	0.000949	0.00105	0.00115	0.00127	0.0014	0.00154	0.00169	0.00185	0.00203	0.00223	0.00244	0.00267	0.00291	0.00318	0.00347	0.00379	0.00412	0.00449	0.00488	0.0053	0.00576	0.00625	0.00677	0.00733	0.00793	0.00858	0.00927	0.01001	0.01079	0.01163	0.01252	0.01348	0.01449	0.01556
0.000136	0.000153	0.000172	0.000192	0.000215	0.000241	0.000269	0.0003	0.000335	0.000373	0.000416	0.000462	0.000514	0.000571	0.000633	0.000702	0.000778	0.000861	0.000952	0.00105	0.00116	0.00128	0.00141	0.00155	0.00171	0.00188	0.00206	0.00226	0.00248	0.00272	0.00297	0.00325	0.00355	0.00388	0.00423	0.00461	0.00502	0.00546	0.00593	0.00644	0.00699	0.00757	0.0082	0.00888	0.0096	0.01037	0.0112	0.01207	0.01301	0.01401
0.000105	0.000118	0.000133	0.00015	0.000168	0.000189	0.000212	0.000237	0.000266	0.000297	0.000332	0.000371	0.000414	0.000461	0.000514	0.000572	0.000635	0.000706	0.000783	0.000868	0.000961	0.00106	0.00118	0.0013	0.00143	0.00158	0.00174	0.00192	0.00211	0.00232	0.00254	0.00279	0.00305	0.00334	0.00366	0.00399	0.00436	0.00476	0.00518	0.00564	0.00614	0.00667	0.00725	0.00786	0.00852	0.00923	0.00999	0.0108	0.01167	0.01259
8e-05	9.1e-05	0.000103	0.000116	0.000131	0.000148	0.000166	0.000187	0.00021	0.000236	0.000265	0.000297	0.000332	0.000372	0.000415	0.000464	0.000517	0.000577	0.000642	0.000714	0.000794	0.000881	0.000977	0.00108	0.0012	0.00133	0.00147	0.00162	0.00179	0.00197	0.00217	0.00238	0.00262	0.00288	0.00315	0.00346	0.00378	0.00414	0.00452	0.00494	0.00539	0.00587	0.00639	0.00695	0.00756	0.0082	0.0089	0.00965	0.01045	0.0113
6.1e-05	7e-05	7.9e-05	9e-05	0.000101	0.000115	0.00013	0.000147	0.000165	0.000187	0.00021	0.000236	0.000266	0.000298	0.000335	0.000375	0.00042	0.00047	0.000525	0.000586	0.000653	0.000728	0.00081	0.000901	0.001	0.00111	0.00123	0.00136	0.00151	0.00167	0.00184	0.00203	0.00224	0.00247	0.00272	0.00298	0.00328	0.00359	0.00394	0.00431	0.00472	0.00515	0.00563	0.00614	0.00669	0.00728	0.00792	0.0086	0.00934	0.01013
4.7e-05	5.3e-05	6.1e-05	6.9e-05	7.8e-05	8.9e-05	0.000101	0.000115	0.00013	0.000147	0.000166	0.000188	0.000212	0.000239	0.000269	0.000302	0.00034	0.000381	0.000428	0.000479	0.000536	0.0006	0.00067	0.000747	0.000833	0.000927	0.00103	0.00115	0.00127	0.00141	0.00156	0.00173	0.00191	0.00211	0.00233	0.00257	0.00283	0.00312	0.00342	0.00376	0.00412	0.00452	0.00495	0.00541	0.00591	0.00645	0.00703	0.00766	0.00834	0.00906
3.5e-05	4e-05	4.6e-05	5.3e-05	6e-05	6.9e-05	7.8e-05	8.9e-05	0.000102	0.000115	0.000131	0.000149	0.000168	0.00019	0.000215	0.000243	0.000274	0.000309	0.000348	0.000391	0.000439	0.000493	0.000552	0.000618	0.000692	0.000773	0.000862	0.000962	0.00107	0.00119	0.00133	0.00147	0.00163	0.00181	0.002	0.00221	0.00244	0.0027	0.00297	0.00327	0.0036	0.00396	0.00434	0.00476	0.00522	0.00571	0.00624	0.00681	0.00743	0.0081
2.7e-05	3.1e-05	3.5e-05	4e-05	4.6e-05	5.3e-05	6.1e-05	6.9e-05	7.9e-05	9e-05	0.000103	0.000117	0.000133	0.000151	0.000172	0.000195	0.000221	0.000249	0.000282	0.000318	0.000359	0.000404	0.000454	0.00051	0.000573	0.000642	0.000719	0.000805	0.000899	0.001	0.00112	0.00125	0.00139	0.00154	0.00171	0.0019	0.0021	0.00233	0.00258	0.00284	0.00314	0.00346	0.00381	0.00418	0.0046	0.00504	0.00553	0.00605	0.00662	0.00723
2e-05	2.3e-05	2.7e-05	3.1e-05	3.5e-05	4.1e-05	4.7e-05	5.4e-05	6.2e-05	7e-05	8.1e-05	9.2e-05	0.000105	0.00012	0.000137	0.000156	0.000177	0.000201	0.000228	0.000258	0.000292	0.00033	0.000373	0.00042	0.000473	0.000532	0.000598	0.000672	0.000753	0.000844	0.000944	0.00106	0.00118	0.00131	0.00146	0.00163	0.00181	0.00201	0.00223	0.00247	0.00273	0.00302	0.00333	0.00367	0.00405	0.00445	0.00489	0.00537	0.00589	0.00645
1.5e-05	1.7e-05	2e-05	2.3e-05	2.7e-05	3.1e-05	3.6e-05	4.1e-05	4.8e-05	5.5e-05	6.3e-05	7.2e-05	8.3e-05	9.5e-05	0.000109	0.000124	0.000141	0.000161	0.000184	0.000209	0.000237	0.000269	0.000305	0.000345	0.00039	0.00044	0.000497	0.00056	0.00063	0.000708	0.000794	0.000891	0.000998	0.00112	0.00125	0.00139	0.00155	0.00173	0.00192	0.00214	0.00237	0.00263	0.00291	0.00322	0.00355	0.00392	0.00432	0.00476	0.00523	0.00575
1.1e-05	1.3e-05	1.5e-05	1.8e-05	2e-05	2.4e-05	2.7e-05	3.2e-05	3.7e-05	4.2e-05	4.9e-05	5.6e-05	6.5e-05	7.5e-05	8.6e-05	9.8e-05	0.000113	0.000129	0.000148	0.000168	0.000192	0.000219	0.000249	0.000283	0.000321	0.000363	0.000411	0.000465	0.000525	0.000592	0.000667	0.000751	0.000844	0.000947	0.00106	0.00119	0.00133	0.00149	0.00166	0.00185	0.00206	0.00229	0.00254	0.00282	0.00312	0.00345	0.00382	0.00421	0.00464	0.00511
8e-06	1e-05	1.1e-05	1.3e-05	1.5e-05	1.8e-05	2.1e-05	2.4e-05	2.8e-05	3.3e-05	3.8e-05	4.4e-05	5.1e-05	5.9e-05	6.8e-05	7.8e-05	9e-05	0.000103	0.000118	0.000135	0.000155	0.000177	0.000202	0.000231	0.000263	0.000299	0.00034	0.000386	0.000437	0.000495	0.000559	0.000631	0.000712	0.000802	0.000902	0.00101	0.00114	0.00127	0.00143	0.0016	0.00178	0.00199	0.00221	0.00246	0.00273	0.00303	0.00336	0.00372	0.00412	0.00455
6e-06	7e-06	8e-06	1e-05	1.2e-05	1.4e-05	1.6e-05	1.9e-05	2.2e-05	2.5e-05	2.9e-05	3.4e-05	4e-05	4.6e-05	5.3e-05	6.2e-05	7.1e-05	8.2e-05	9.4e-05	0.000109	0.000125	0.000143	0.000164	0.000188	0.000215	0.000246	0.00028	0.000319	0.000363	0.000412	0.000468	0.00053	0.0006	0.000678	0.000765	0.000862	0.000971	0.00109	0.00123	0.00138	0.00154	0.00172	0.00193	0.00215	0.00239	0.00266	0.00296	0.00329	0.00364	0.00404
4e-06	5e-06	6e-06	7e-06	9e-06	1e-05	1.2e-05	1.4e-05	1.6e-05	1.9e-05	2.3e-05	2.6e-05	3.1e-05	3.6e-05	4.2e-05	4.8e-05	5.6e-05	6.5e-05	7.5e-05	8.7e-05	0.0001	0.000116	0.000133	0.000153	0.000176	0.000201	0.00023	0.000263	0.000301	0.000343	0.00039	0.000444	0.000504	0.000572	0.000647	0.000732	0.000827	0.000933	0.00105	0.00118	0.00133	0.00149	0.00167	0.00187	0.00209	0.00234	0.0026	0.0029	0.00322	0.00358
3e-06	4e-06	5e-06	5e-06	6e-06	8e-06	9e-06	1.1e-05	1.3e-05	1.5e-05	1.7e-05	2e-05	2.4e-05	2.8e-05	3.3e-05	3.8e-05	4.4e-05	5.1e-05	6e-05	6.9e-05	8e-05	9.3e-05	0.000107	0.000124	0.000143	0.000164	0.000189	0.000217	0.000248	0.000284	0.000325	0.000371	0.000423	0.000481	0.000547	0.000621	0.000704	0.000796	0.0009	0.00102	0.00115	0.00129	0.00145	0.00163	0.00183	0.00205	0.00229	0.00255	0.00285	0.00317
2e-06	3e-06	3e-06	4e-06	5e-06	6e-06	7e-06	8e-06	1e-05	1.1e-05	1.3e-05	1.6e-05	1.8e-05	2.2e-05	2.5e-05	3e-05	3.5e-05	4.1e-05	4.7e-05	5.5e-05	6.4e-05	7.5e-05	8.7e-05	0.0001	0.000116	0.000134	0.000155	0.000178	0.000205	0.000235	0.00027	0.000309	0.000354	0.000404	0.000461	0.000525	0.000597	0.000679	0.00077	0.000872	0.000986	0.00111	0.00126	0.00142	0.00159	0.00179	0.00201	0.00225	0.00251	0.00281
2e-06	2e-06	2e-06	3e-06	4e-06	4e-06	5e-06	6e-06	7e-06	9e-06	1e-05	1.2e-05	1.4e-05	1.7e-05	2e-05	2.3e-05	2.7e-05	3.2e-05	3.7e-05	4.4e-05	5.1e-05	6e-05	7e-05	8.1e-05	9.4e-05	0.000109	0.000126	0.000146	0.000169	0.000194	0.000224	0.000257	0.000296	0.000339	0.000388	0.000444	0.000506	0.000577	0.000657	0.000747	0.000847	0.00096	0.00109	0.00123	0.00139	0.00156	0.00176	0.00197	0.00221	0.00248
1e-06	2e-06	2e-06	2e-06	3e-06	3e-06	4e-06	5e-06	5e-06	6e-06	8e-06	9e-06	1.1e-05	1.3e-05	1.5e-05	1.8e-05	2.1e-05	2.5e-05	2.9e-05	3.5e-05	4.1e-05	4.8e-05	5.6e-05	6.5e-05	7.6e-05	8.8e-05	0.000103	0.000119	0.000138	0.00016	0.000185	0.000214	0.000246	0.000284	0.000326	0.000374	0.000428	0.00049	0.00056	0.000638	0.000727	0.000827	0.000939	0.00106	0.00121	0.00136	0.00154	0.00173	0.00195	0.00219
1e-06	1e-06	1e-06	2e-06	2e-06	2e-06	3e-06	3e-06	4e-06	5e-06	6e-06	7e-06	8e-06	1e-05	1.2e-05	1.4e-05	1.7e-05	2e-05	2.3e-05	2.7e-05	3.2e-05	3.8e-05	4.4e-05	5.2e-05	6.1e-05	7.2e-05	8.4e-05	9.7e-05	0.000113	0.000132	0.000153	0.000177	0.000205	0.000237	0.000273	0.000315	0.000362	0.000415	0.000476	0.000545	0.000623	0.00071	0.000809	0.000921	0.00105	0.00119	0.00134	0.00152	0.00171	0.00193
1e-06	1e-06	1e-06	1e-06	1e-06	2e-06	2e-06	3e-06	3e-06	4e-06	4e-06	5e-06	6e-06	8e-06	9e-06	1.1e-05	1.3e-05	1.5e-05	1.8e-05	2.1e-05	2.5e-05	3e-05	3.5e-05	4.2e-05	4.9e-05	5.8e-05	6.8e-05	7.9e-05	9.3e-05	0.000108	0.000126	0.000147	0.00017	0.000197	0.000228	0.000264	0.000305	0.000351	0.000404	0.000464	0.000532	0.00061	0.000697	0.000795	0.000906	0.00103	0.00117	0.00133	0.00151	0.0017
0	1e-06	1e-06	1e-06	1e-06	1e-06	2e-06	2e-06	2e-06	3e-06	3e-06	4e-06	5e-06	6e-06	7e-06	8e-06	1e-05	1.2e-05	1.4e-05	1.7e-05	2e-05	2.4e-05	2.8e-05	3.3e-05	3.9e-05	4.6e-05	5.5e-05	6.4e-05	7.5e-05	8.8e-05	0.000103	0.000121	0.000141	0.000164	0.000191	0.000221	0.000256	0.000297	0.000342	0.000395	0.000454	0.000522	0.000599	0.000686	0.000785	0.000896	0.00102	0.00116	0.00132	0.0015
0	0	0	1e-06	1e-06	1e-06	1e-06	1e-06	2e-06	2e-06	2e-06	3e-06	4e-06	4e-06	5e-06	6e-06	8e-06	9e-06	1.1e-05	1.3e-05	1.6e-05	1.9e-05	2.2e-05	2.7e-05	3.1e-05	3.7e-05	4.4e-05	5.2e-05	6.1e-05	7.2e-05	8.5e-05	0.0001	0.000117	0.000136	0.000159	0.000185	0.000215	0.00025	0.00029	0.000335	0.000387	0.000447	0.000514	0.000591	0.000678	0.000777	0.000888	0.00101	0.00116	0.00132
0	0	0	0	1e-06	1e-06	1e-06	1e-06	1e-06	2e-06	2e-06	2e-06	3e-06	3e-06	4e-06	5e-06	6e-06	7e-06	9e-06	1e-05	1.2e-05	1.5e-05	1.8e-05	2.1e-05	2.5e-05	3e-05	3.5e-05	4.2e-05	5e-05	5.9e-05	6.9e-05	8.2e-05	9.6e-05	0.000113	0.000132	0.000155	0.00018	0.00021	0.000245	0.000284	0.000329	0.000381	0.000441	0.000508	0.000585	0.000673	0.000772	0.000884	0.00101	0.00115
0	0	0	0	0	0	1e-06	1e-06	1e-06	1e-06	1e-06	2e-06	2e-06	3e-06	3e-06	4e-06	5e-06	5e-06	7e-06	8e-06	1e-05	1.2e-05	1.4e-05	1.7e-05	2e-05	2.4e-05	2.8e-05	3.4e-05	4e-05	4.8e-05	5.7e-05	6.7e-05	7.9e-05	9.3e-05	0.00011	0.000129	0.000151	0.000177	0.000206	0.00024	0.00028	0.000325	0.000377	0.000436	0.000504	0.000582	0.00067	0.00077	0.000883	0.00101
0	0	0	0	0	0	0	1e-06	1e-06	1e-06	1e-06	1e-06	2e-06	2e-06	2e-06	3e-06	3e-06	4e-06	5e-06	6e-06	7e-06	9e-06	1.1e-05	1.3e-05	1.6e-05	1.9e-05	2.3e-05	2.7e-05	3.3e-05	3.9e-05	4.6e-05	5.5e-05	6.5e-05	7.7e-05	9.1e-05	0.000107	0.000126	0.000148	0.000173	0.000203	0.000237	0.000277	0.000322	0.000374	0.000434	0.000502	0.00058	0.000669	0.000771	0.000886
0	0	0	0	0	0	0	0	0	1e-06	1e-06	1e-06	1e-06	1e-06	2e-06	2e-06	3e-06	3e-06	4e-06	5e-06	6e-06	7e-06	9e-06	1e-05	1.3e-05	1.5e-05	1.8e-05	2.2e-05	2.6e-05	3.1e-05	3.8e-05	4.5e-05	5.3e-05	6.3e-05	7.5e-05	8.9e-05	0.000105	0.000124	0.000146	0.000171	0.000201	0.000235	0.000275	0.00032	0.000373	0.000433	0.000502	0.000581	0.000671	0.000774
0	0	0	0	0	0	0	0	0	0	1e-06	1e-06	1e-06	1e-06	1e-06	2e-06	2e-06	2e-06	3e-06	4e-06	5e-06	5e-06	7e-06	8e-06	1e-05	1.2e-05	1.4e-05	1.7e-05	2.1e-05	2.5e-05	3e-05	3.6e-05	4.4e-05	5.2e-05	6.2e-05	7.4e-05	8.7e-05	0.000103	0.000122	0.000144	0.00017	0.000199	0.000234	0.000274	0.00032	0.000373	0.000434	0.000504	0.000584	0.000676
0	0	0	0	0	0	0	0	0	0	0	1e-06	1e-06	1e-06	1e-06	1e-06	2e-06	2e-06	2e-06	3e-06	3e-06	4e-06	5e-06	6e-06	8e-06	9e-06	1.2e-05	1.4e-05	1.7e-05	2e-05	2.5e-05	3e-05	3.6e-05	4.3e-05	5.1e-05	6.1e-05	7.2e-05	8.6e-05	0.000102	0.000121	0.000143	0.000169	0.000199	0.000233	0.000274	0.00032	0.000374	0.000436	0.000508	0.000589
0	0	0	0	0	0	0	0	0	0	0	0	0	1e-06	1e-06	1e-06	1e-06	1e-06	2e-06	2e-06	3e-06	3e-06	4e-06	5e-06	6e-06	7e-06	9e-06	1.1e-05	1.4e-05	1.6e-05	2e-05	2.4e-05	2.9e-05	3.5e-05	4.2e-05	5e-05	6e-05	7.2e-05	8.5e-05	0.000101	0.00012	0.000143	0.000169	0.000199	0.000234	0.000275	0.000322	0.000377	0.00044	0.000513
0	0	0	0	0	0	0	0	0	0	0	0	0	0	1e-06	1e-06	1e-06	1e-06	1e-06	2e-06	2e-06	3e-06	3e-06	4e-06	5e-06	6e-06	7e-06	9e-06	1.1e-05	1.3e-05	1.6e-05	1.9e-05	2.3e-05	2.8e-05	3.4e-05	4.1e-05	5e-05	5.9e-05	7.1e-05	8.5e-05	0.000101	0.00012	0.000143	0.000169	0.0002	0.000236	0.000277	0.000326	0.000382	0.000446
0	0	0	0	0	0	0	0	0	0	0	0	0	0	0	1e-06	1e-06	1e-06	1e-06	1e-06	2e-06	2e-06	2e-06	3e-06	4e-06	5e-06	6e-06	7e-06	9e-06	1.1e-05	1.3e-05	1.6e-05	1.9e-05	2.3e-05	2.8e-05	3.4e-05	4.1e-05	4.9e-05	5.9e-05	7.1e-05	8.5e-05	0.000101	0.000121	0.000143	0.00017	0.000202	0.000238	0.000281	0.00033	0.000388
0	0	0	0	0	0	0	0	0	0	0	0	0	0	0	0	0	1e-06	1e-06	1e-06	1e-06	2e-06	2e-06	2e-06	3e-06	4e-06	4e-06	6e-06	7e-06	8e-06	1e-05	1.3e-05	1.5e-05	1.9e-05	2.3e-05	2.8e-05	3.4e-05	4.1e-05	4.9e-05	5.9e-05	7.1e-05	8.5e-05	0.000102	0.000122	0.000145	0.000172	0.000204	0.000242	0.000285	0.000336
0	0	0	0	0	0	0	0	0	0	0	0	0	0	0	0	0	0	1e-06	1e-06	1e-06	1e-06	1e-06	2e-06	2e-06	3e-06	4e-06	4e-06	5e-06	7e-06	8e-06	1e-05	1.2e-05	1.5e-05	1.9e-05	2.3e-05	2.8e-05	3.4e-05	4.1e-05	4.9e-05	5.9e-05	7.1e-05	8.6e-05	0.000103	0.000123	0.000147	0.000175	0.000208	0.000246	0.000291
0	0	0	0	0	0	0	0	0	0	0	0	0	0	0	0	0	0	0	1e-06	1e-06	1e-06	1e-06	1e-06	2e-06	2e-06	3e-06	3e-06	4e-06	5e-06	7e-06	8e-06	1e-05	1.2e-05	1.5e-05	1.9e-05	2.3e-05	2.8e-05	3.4e-05	4.1e-05	5e-05	6e-05	7.2e-05	8.7e-05	0.000104	0.000125	0.000149	0.000178	0.000212	0.000252
0	0	0	0	0	0	0	0	0	0	0	0	0	0	0	0	0	0	0	0	1e-06	1e-06	1e-06	1e-06	1e-06	2e-06	2e-06	3e-06	3e-06	4e-06	5e-06	6e-06	8e-06	1e-05	1.2e-05	1.5e-05	1.9e-05	2.3e-05	2.8e-05	3.4e-05	4.1e-05	5e-05	6.1e-05	7.3e-05	8.8e-05	0.000106	0.000128	0.000153	0.000182	0.000217
0	0	0	0	0	0	0	0	0	0	0	0	0	0	0	0	0	0	0	0	0	1e-06	1e-06	1e-06	1e-06	1e-06	2e-06	2e-06	3e-06	3e-06	4e-06	5e-06	6e-06	8e-06	1e-05	1.2e-05	1.5e-05	1.9e-05	2.3e-05	2.8e-05	3.4e-05	4.2e-05	5.1e-05	6.2e-05	7.5e-05	9e-05	0.000109	0.000131	0.000157	0.000187
0	0	0	0	0	0	0	0	0	0	0	0	0	0	0	0	0	0	0	0	0	0	0	1e-06	1e-06	1e-06	1e-06	2e-06	2e-06	3e-06	3e-06	4e-06	5e-06	6e-06	8e-06	1e-05	1.2e-05	1.5e-05	1.9e-05	2.3e-05	2.8e-05	3.5e-05	4.3e-05	5.2e-05	6.3e-05	7.6e-05	9.2e-05	0.000112	0.000134	0.000161
0	0	0	0	0	0	0	0	0	0	0	0	0	0	0	0	0	0	0	0	0	0	0	0	1e-06	1e-06	1e-06	1e-06	2e-06	2e-06	3e-06	3e-06	4e-06	5e-06	6e-06	8e-06	1e-05	1.2e-05	1.5e-05	1.9e-05	2.4e-05	2.9e-05	3.6e-05	4.3e-05	5.3e-05	6.5e-05	7.9e-05	9.5e-05	0.000115	0.000139
0	0	0	0	0	0	0	0	0	0	0	0	0	0	0	0	0	0	0	0	0	0	0	0	0	1e-06	1e-06	1e-06	1e-06	2e-06	2e-06	3e-06	3e-06	4e-06	5e-06	7e-06	8e-06	1e-05	1.3e-05	1.6e-05	1.9e-05	2.4e-05	3e-05	3.6e-05	4.5e-05	5.5e-05	6.7e-05	8.1e-05	9.8e-05	0.000119
0	0	0	0	0	0	0	0	0	0	0	0	0	0	0	0	0	0	0	0	0	0	0	0	0	0	1e-06	1e-06	1e-06	1e-06	2e-06	2e-06	3e-06	3e-06	4e-06	5e-06	7e-06	8e-06	1e-05	1.3e-05	1.6e-05	2e-05	2.5e-05	3e-05	3.8e-05	4.6e-05	5.6e-05	6.9e-05	8.4e-05	0.000102
0	0	0	0	0	0	0	0	0	0	0	0	0	0	0	0	0	0	0	0	0	0	0	0	0	0	0	1e-06	1e-06	1e-06	1e-06	2e-06	2e-06	3e-06	3e-06	4e-06	5e-06	7e-06	8e-06	1.1e-05	1.3e-05	1.6e-05	2.1e-05	2.5e-05	3.1e-05	3.9e-05	4.8e-05	5.9e-05	7.2e-05	8.7e-05
0	0	0	0	0	0	0	0	0	0	0	0	0	0	0	0	0	0	0	0	0	0	0	0	0	0	0	0	1e-06	1e-06	1e-06	1e-06	2e-06	2e-06	3e-06	3e-06	4e-06	5e-06	7e-06	9e-06	1.1e-05	1.4e-05	1.7e-05	2.1e-05	2.6e-05	3.3e-05	4e-05	5e-05	6.1e-05	7.5e-05
0	0	0	0	0	0	0	0	0	0	0	0	0	0	0	0	0	0	0	0	0	0	0	0	0	0	0	0	0	1e-06	1e-06	1e-06	1e-06	2e-06	2e-06	3e-06	3e-06	4e-06	6e-06	7e-06	9e-06	1.1e-05	1.4e-05	1.8e-05	2.2e-05	2.7e-05	3.4e-05	4.2e-05	5.2e-05	6.4e-05
0	0	0	0	0	0	0	0	0	0	0	0	0	0	0	0	0	0	0	0	0	0	0	0	0	0	0	0	0	0	1e-06	1e-06	1e-06	1e-06	2e-06	2e-06	3e-06	4e-06	5e-06	6e-06	7e-06	9e-06	1.2e-05	1.5e-05	1.8e-05	2.3e-05	2.9e-05	3.6e-05	4.4e-05	5.4e-05
0	0	0	0	0	0	0	0	0	0	0	0	0	0	0	0	0	0	0	0	0	0	0	0	0	0	0	0	0	0	0	1e-06	1e-06	1e-06	1e-06	2e-06	2e-06	3e-06	4e-06	5e-06	6e-06	8e-06	1e-05	1.2e-05	1.5e-05	1.9e-05	2.4e-05	3e-05	3.7e-05	4.6e-05
0	0	0	0	0	0	0	0	0	0	0	0	0	0	0	0	0	0	0	0	0	0	0	0	0	0	0	0	0	0	0	0	1e-06	1e-06	1e-06	1e-06	2e-06	2e-06	3e-06	4e-06	5e-06	6e-06	8e-06	1e-05	1.3e-05	1.6e-05	2e-05	2.5e-05	3.2e-05	3.9e-05
0	0	0	0	0	0	0	0	0	0	0	0	0	0	0	0	0	0	0	0	0	0	0	0	0	0	0	0	0	0	0	0	0	1e-06	1e-06	1e-06	1e-06	2e-06	2e-06	3e-06	4e-06	5e-06	7e-06	8e-06	1.1e-05	1.3e-05	1.7e-05	2.1e-05	2.7e-05	3.3e-05
0	0	0	0	0	0	0	0	0	0	0	0	0	0	0	0	0	0	0	0	0	0	0	0	0	0	0	0	0	0	0	0	0	1e-06	1e-06	1e-06	1e-06	1e-06	2e-06	2e-06	3e-06	4e-06	5e-06	7e-06	9e-06	1.1e-05	1.4e-05	1.8e-05	2.3e-05	2.8e-05
0	0	0	0	0	0	0	0	0	0	0	0	0	0	0	0	0	0	0	0	0	0	0	0	0	0	0	0	0	0	0	0	0	0	1e-06	1e-06	1e-06	1e-06	2e-06	2e-06	3e-06	3e-06	4e-06	6e-06	7e-06	9e-06	1.2e-05	1.5e-05	1.9e-05	2.4e-05
0	0	0	0	0	0	0	0	0	0	0	0	0	0	0	0	0	0	0	0	0	0	0	0	0	0	0	0	0	0	0	0	0	0	0	1e-06	1e-06	1e-06	1e-06	2e-06	2e-06	3e-06	4e-06	5e-06	6e-06	8e-06	1e-05	1.3e-05	1.6e-05	2e-05
0	0	0	0	0	0	0	0	0	0	0	0	0	0	0	0	0	0	0	0	0	0	0	0	0	0	0	0	0	0	0	0	0	0	0	0	1e-06	1e-06	1e-06	1e-06	2e-06	2e-06	3e-06	4e-06	5e-06	6e-06	8e-06	1e-05	1.3e-05	1.7e-05
0	0	0	0	0	0	0	0	0	0	0	0	0	0	0	0	0	0	0	0	0	0	0	0	0	0	0	0	0	0	0	0	0	0	0	0	0	1e-06	1e-06	1e-06	1e-06	2e-06	2e-06	3e-06	4e-06	5e-06	7e-06	9e-06	1.1e-05	1.4e-05
0	0	0	0	0	0	0	0	0	0	0	0	0	0	0	0	0	0	0	0	0	0	0	0	0	0	0	0	0	0	0	0	0	0	0	0	0	0	1e-06	1e-06	1e-06	1e-06	2e-06	3e-06	3e-06	4e-06	6e-06	7e-06	9e-06	1.2e-05
0	0	0	0	0	0	0	0	0	0	0	0	0	0	0	0	0	0	0	0	0	0	0	0	0	0	0	0	0	0	0	0	0	0	0	0	0	0	1e-06	1e-06	1e-06	1e-06	2e-06	2e-06	3e-06	4e-06	5e-06	6e-06	8e-06	1e-05
0	0	0	0	0	0	0	0	0	0	0	0	0	0	0	0	0	0	0	0	0	0	0	0	0	0	0	0	0	0	0	0	0	0	0	0	0	0	0	1e-06	1e-06	1e-06	1e-06	2e-06	2e-06	3e-06	4e-06	5e-06	7e-06	9e-06
0	0	0	0	0	0	0	0	0	0	0	0	0	0	0	0	0	0	0	0	0	0	0	0	0	0	0	0	0	0	0	0	0	0	0	0	0	0	0	0	1e-06	1e-06	1e-06	1e-06	2e-06	2e-06	3e-06	4e-06	5e-06	7e-06
0	0	0	0	0	0	0	0	0	0	0	0	0	0	0	0	0	0	0	0	0	0	0	0	0	0	0	0	0	0	0	0	0	0	0	0	0	0	0	0	0	1e-06	1e-06	1e-06	1e-06	2e-06	3e-06	3e-06	5e-06	6e-06
0	0	0	0	0	0	0	0	0	0	0	0	0	0	0	0	0	0	0	0	0	0	0	0	0	0	0	0	0	0	0	0	0	0	0	0	0	0	0	0	0	0	1e-06	1e-06	1e-06	2e-06	2e-06	3e-06	4e-06	5e-06
0	0	0	0	0	0	0	0	0	0	0	0	0	0	0	0	0	0	0	0	0	0	0	0	0	0	0	0	0	0	0	0	0	0	0	0	0	0	0	0	0	0	1e-06	1e-06	1e-06	1e-06	2e-06	2e-06	3e-06	4e-06
0	0	0	0	0	0	0	0	0	0	0	0	0	0	0	0	0	0	0	0	0	0	0	0	0	0	0	0	0	0	0	0	0	0	0	0	0	0	0	0	0	0	0	1e-06	1e-06	1e-06	1e-06	2e-06	3e-06	3e-06
0	0	0	0	0	0	0	0	0	0	0	0	0	0	0	0	0	0	0	0	0	0	0	0	0	0	0	0	0	0	0	0	0	0	0	0	0	0	0	0	0	0	0	0	1e-06	1e-06	1e-06	2e-06	2e-06	3e-06
0	0	0	0	0	0	0	0	0	0	0	0	0	0	0	0	0	0	0	0	0	0	0	0	0	0	0	0	0	0	0	0	0	0	0	0	0	0	0	0	0	0	0	0	1e-06	1e-06	1e-06	1e-06	2e-06	2e-06
0	0	0	0	0	0	0	0	0	0	0	0	0	0	0	0	0	0	0	0	0	0	0	0	0	0	0	0	0	0	0	0	0	0	0	0	0	0	0	0	0	0	0	0	0	1e-06	1e-06	1e-06	1e-06	2e-06
0	0	0	0	0	0	0	0	0	0	0	0	0	0	0	0	0	0	0	0	0	0	0	0	0	0	0	0	0	0	0	0	0	0	0	0	0	0	0	0	0	0	0	0	0	0	1e-06	1e-06	1e-06	2e-06
0	0	0	0	0	0	0	0	0	0	0	0	0	0	0	0	0	0	0	0	0	0	0	0	0	0	0	0	0	0	0	0	0	0	0	0	0	0	0	0	0	0	0	0	0	0	1e-06	1e-06	1e-06	1e-06
0	0	0	0	0	0	0	0	0	0	0	0	0	0	0	0	0	0	0	0	0	0	0	0	0	0	0	0	0	0	0	0	0	0	0	0	0	0	0	0	0	0	0	0	0	0	0	1e-06	1e-06	1e-06
0	0	0	0	0	0	0	0	0	0	0	0	0	0	0	0	0	0	0	0	0	0	0	0	0	0	0	0	0	0	0	0	0	0	0	0	0	0	0	0	0	0	0	0	0	0	0	0	1e-06	1e-06
0	0	0	0	0	0	0	0	0	0	0	0	0	0	0	0	0	0	0	0	0	0	0	0	0	0	0	0	0	0	0	0	0	0	0	0	0	0	0	0	0	0	0	0	0	0	0	0	1e-06	1e-06
0	0	0	0	0	0	0	0	0	0	0	0	0	0	0	0	0	0	0	0	0	0	0	0	0	0	0	0	0	0	0	0	0	0	0	0	0	0	0	0	0	0	0	0	0	0	0	0	0	1e-06
0	0	0	0	0	0	0	0	0	0	0	0	0	0	0	0	0	0	0	0	0	0	0	0	0	0	0	0	0	0	0	0	0	0	0	0	0	0	0	0	0	0	0	0	0	0	0	0	0	1e-06
0	0	0	0	0	0	0	0	0	0	0	0	0	0	0	0	0	0	0	0	0	0	0	0	0	0	0	0	0	0	0	0	0	0	0	0	0	0	0	0	0	0	0	0	0	0	0	0	0	0
0	0	0	0	0	0	0	0	0	0	0	0	0	0	0	0	0	0	0	0	0	0	0	0	0	0	0	0	0	0	0	0	0	0	0	0	0	0	0	0	0	0	0	0	0	0	0	0	0	0
0	0	0	0	0	0	0	0	0	0	0	0	0	0	0	0	0	0	0	0	0	0	0	0	0	0	0	0	0	0	0	0	0	0	0	0	0	0	0	0	0	0	0	0	0	0	0	0	0	0
0	0	0	0	0	0	0	0	0	0	0	0	0	0	0	0	0	0	0	0	0	0	0	0	0	0	0	0	0	0	0	0	0	0	0	0	0	0	0	0	0	0	0	0	0	0	0	0	0	0
0	0	0	0	0	0	0	0	0	0	0	0	0	0	0	0	0	0	0	0	0	0	0	0	0	0	0	0	0	0	0	0	0	0	0	0	0	0	0	0	0	0	0	0	0	0	0	0	0	0
0	0	0	0	0	0	0	0	0	0	0	0	0	0	0	0	0	0	0	0	0	0	0	0	0	0	0	0	0	0	0	0	0	0	0	0	0	0	0	0	0	0	0	0	0	0	0	0	0	0
0	0	0	0	0	0	0	0	0	0	0	0	0	0	0	0	0	0	0	0	0	0	0	0	0	0	0	0	0	0	0	0	0	0	0	0	0	0	0	0	0	0	0	0	0	0	0	0	0	0
0	0	0	0	0	0	0	0	0	0	0	0	0	0	0	0	0	0	0	0	0	0	0	0	0	0	0	0	0	0	0	0	0	0	0	0	0	0	0	0	0	0	0	0	0	0	0	0	0	0
0	0	0	0	0	0	0	0	0	0	0	0	0	0	0	0	0	0	0	0	0	0	0	0	0	0	0	0	0	0	0	0	0	0	0	0	0	0	0	0	0	0	0	0	0	0	0	0	0	0
0	0	0	0	0	0	0	0	0	0	0	0	0	0	0	0	0	0	0	0	0	0	0	0	0	0	0	0	0	0	0	0	0	0	0	0	0	0	0	0	0	0	0	0	0	0	0	0	0	0
0	0	0	0	0	0	0	0	0	0	0	0	0	0	0	0	0	0	0	0	0	0	0	0	0	0	0	0	0	0	0	0	0	0	0	0	0	0	0	0	0	0	0	0	0	0	0	0	0	0
0	0	0	0	0	0	0	0	0	0	0	0	0	0	0	0	0	0	0	0	0	0	0	0	0	0	0	0	0	0	0	0	0	0	0	0	0	0	0	0	0	0	0	0	0	0	0	0	0	0
0	0	0	0	0	0	0	0	0	0	0	0	0	0	0	0	0	0	0	0	0	0	0	0	0	0	0	0	0	0	0	0	0	0	0	0	0	0	0	0	0	0	0	0	0	0	0	0	0	0
0	0	0	0	0	0	0	0	0	0	0	0	0	0	0	0	0	0	0	0	0	0	0	0	0	0	0	0	0	0	0	0	0	0	0	0	0	0	0	0	0	0	0	0	0	0	0	0	0	0
0	0	0	0	0	0	0	0	0	0	0	0	0	0	0	0	0	0	0	0	0	0	0	0	0	0	0	0	0	0	0	0	0	0	0	0	0	0	0	0	0	0	0	0	0	0	0	0	0	0
0	0	0	0	0	0	0	0	0	0	0	0	0	0	0	0	0	0	0	0	0	0	0	0	0	0	0	0	0	0	0	0	0	0	0	0	0	0	0	0	0	0	0	0	0	0	0	0	0	0
0	0	0	0	0	0	0	0	0	0	0	0	0	0	0	0	0	0	0	0	0	0	0	0	0	0	0	0	0	0	0	0	0	0	0	0	0	0	0	0	0	0	0	0	0	0	0	0	0	0
0	0	0	0	0	0	0	0	0	0	0	0	0	0	0	0	0	0	0	0	0	0	0	0	0	0	0	0	0	0	0	0	0	0	0	0	0	0	0	0	0	0	0	0	0	0	0	0	0	0
0	0	0	0	0	0	0	0	0	0	0	0	0	0	0	0	0	0	0	0	0	0	0	0	0	0	0	0	0	0	0	0	0	0	0	0	0	0	0	0	0	0	0	0	0	0	0	0	0	0
0	0	0	0	0	0	0	0	0	0	0	0	0	0	0	0	0	0	0	0	0	0	0	0	0	0	0	0	0	0	0	0	0	0	0	0	0	0	0	0	0	0	0	0	0	0	0	0	0	0
0	0	0	0	0	0	0	0	0	0	0	0	0	0	0	0	0	0	0	0	0	0	0	0	0	0	0	0	0	0	0	0	0	0	0	0	0	0	0	0	0	0	0	0	0	0	0	0	0	0
0	0	0	0	0	0	0	0	0	0	0	0	0	0	0	0	0	0	0	0	0	0	0	0	0	0	0	0	0	0	0	0	0	0	0	0	0	0	0	0	0	0	0	0	0	0	0	0	0	0
0	0	0	0	0	0	0	0	0	0	0	0	0	0	0	0	0	0	0	0	0	0	0	0	0	0	0	0	0	0	0	0	0	0	0	0	0	0	0	0	0	0	0	0	0	0	0	0	0	0
0	0	0	0	0	0	0	0	0	0	0	0	0	0	0	0	0	0	0	0	0	0	0	0	0	0	0	0	0	0	0	0	0	0	0	0	0	0	0	0	0	0	0	0	0	0	0	0	0	0
0	0	0	0	0	0	0	0	0	0	0	0	0	0	0	0	0	0	0	0	0	0	0	0	0	0	0	0	0	0	0	0	0	0	0	0	0	0	0	0	0	0	0	0	0	0	0	0	0	0
0	0	0	0	0	0	0	0	0	0	0	0	0	0	0	0	0	0	0	0	0	0	0	0	0	0	0	0	0	0	0	0	0	0	0	0	0	0	0	0	0	0	0	0	0	0	0	0	0	0
0	0	0	0	0	0	0	0	0	0	0	0	0	0	0	0	0	0	0	0	0	0	0	0	0	0	0	0	0	0	0	0	0	0	0	0	0	0	0	0	0	0	0	0	0	0	0	0	0	0
0	0	0	0	0	0	0	0	0	0	0	0	0	0	0	0	0	0	0	0	0	0	0	0	0	0	0	0	0	0	0	0	0	0	0	0	0	0	0	0	0	0	0	0	0	0	0	0	0	0
0	0	0	0	0	0	0	0	0	0	0	0	0	0	0	0	0	0	0	0	0	0	0	0	0	0	0	0	0	0	0	0	0	0	0	0	0	0	0	0	0	0	0	0	0	0	0	0	0	0
0	0	0	0	0	0	0	0	0	0	0	0	0	0	0	0	0	0	0	0	0	0	0	0	0	0	0	0	0	0	0	0	0	0	0	0	0	0	0	0	0	0	0	0	0	0	0	0	0	0
0	0	0	0	0	0	0	0	0	0	0	0	0	0	0	0	0	0	0	0	0	0	0	0	0	0	0	0	0	0	0	0	0	0	0	0	0	0	0	0	0	0	0	0	0	0	0	0	0	0
0	0	0	0	0	0	0	0	0	0	0	0	0	0	0	0	0	0	0	0	0	0	0	0	0	0	0	0	0	0	0	0	0	0	0	0	0	0	0	0	0	0	0	0	0	0	0	0	0	0
0	0	0	0	0	0	0	0	0	0	0	0	0	0	0	0	0	0	0	0	0	0	0	0	0	0	0	0	0	0	0	0	0	0	0	0	0	0	0	0	0	0	0	0	0	0	0	0	0	0
0	0	0	0	0	0	0	0	0	0	0	0	0	0	0	0	0	0	0	0	0	0	0	0	0	0	0	0	0	0	0	0	0	0	0	0	0	0	0	0	0	0	0	0	0	0	0	0	0	0
0	0	0	0	0	0	0	0	0	0	0	0	0	0	0	0	0	0	0	0	0	0	0	0	0	0	0	0	0	0	0	0	0	0	0	0	0	0	0	0	0	0	0	0	0	0	0	0	0	0
0	0	0	0	0	0	0	0	0	0	0	0	0	0	0	0	0	0	0	0	0	0	0	0	0	0	0	0	0	0	0	0	0	0	0	0	0	0	0	0	0	0	0	0	0	0	0	0	0	0
0	0	0	0	0	0	0	0	0	0	0	0	0	0	0	0	0	0	0	0	0	0	0	0	0	0	0	0	0	0	0	0	0	0	0	0	0	0	0	0	0	0	0	0	0	0	0	0	0	0
0	0	0	0	0	0	0	0	0	0	0	0	0	0	0	0	0	0	0	0	0	0	0	0	0	0	0	0	0	0	0	0	0	0	0	0	0	0	0	0	0	0	0	0	0	0	0	0	0	0
0	0	0	0	0	0	0	0	0	0	0	0	0	0	0	0	0	0	0	0	0	0	0	0	0	0	0	0	0	0	0	0	0	0	0	0	0	0	0	0	0	0	0	0	0	0	0	0	0	0
0	0	0	0	0	0	0	0	0	0	0	0	0	0	0	0	0	0	0	0	0	0	0	0	0	0	0	0	0	0	0	0	0	0	0	0	0	0	0	0	0	0	0	0	0	0	0	0	0	0
0	0	0	0	0	0	0	0	0	0	0	0	0	0	0	0	0	0	0	0	0	0	0	0	0	0	0	0	0	0	0	0	0	0	0	0	0	0	0	0	0	0	0	0	0	0	0	0	0	0
0	0	0	0	0	0	0	0	0	0	0	0	0	0	0	0	0	0	0	0	0	0	0	0	0	0	0	0	0	0	0	0	0	0	0	0	0	0	0	0	0	0	0	0	0	0	0	0	0	0
0	0	0	0	0	0	0	0	0	0	0	0	0	0	0	0	0	0	0	0	0	0	0	0	0	0	0	0	0	0	0	0	0	0	0	0	0	0	0	0	0	0	0	0	0	0	0	0	0	0
0	0	0	0	0	0	0	0	0	0	0	0	0	0	0	0	0	0	0	0	0	0	0	0	0	0	0	0	0	0	0	0	0	0	0	0	0	0	0	0	0	0	0	0	0	0	0	0	0	0
0	0	0	0	0	0	0	0	0	0	0	0	0	0	0	0	0	0	0	0	0	0	0	0	0	0	0	0	0	0	0	0	0	0	0	0	0	0	0	0	0	0	0	0	0	0	0	0	0	0
0	0	0	0	0	0	0	0	0	0	0	0	0	0	0	0	0	0	0	0	0	0	0	0	0	0	0	0	0	0	0	0	0	0	0	0	0	0	0	0	0	0	0	0	0	0	0	0	0	0
0	0	0	0	0	0	0	0	0	0	0	0	0	0	0	0	0	0	0	0	0	0	0	0	0	0	0	0	0	0	0	0	0	0	0	0	0	0	0	0	0	0	0	0	0	0	0	0	0	0
0	0	0	0	0	0	0	0	0	0	0	0	0	0	0	0	0	0	0	0	0	0	0	0	0	0	0	0	0	0	0	0	0	0	0	0	0	0	0	0	0	0	0	0	0	0	0	0	0	0
0	0	0	0	0	0	0	0	0	0	0	0	0	0	0	0	0	0	0	0	0	0	0	0	0	0	0	0	0	0	0	0	0	0	0	0	0	0	0	0	0	0	0	0	0	0	0	0	0	0
0	0	0	0	0	0	0	0	0	0	0	0	0	0	0	0	0	0	0	0	0	0	0	0	0	0	0	0	0	0	0	0	0	0	0	0	0	0	0	0	0	0	0	0	0	0	0	0	0	0
0	0	0	0	0	0	0	0	0	0	0	0	0	0	0	0	0	0	0	0	0	0	0	0	0	0	0	0	0	0	0	0	0	0	0	0	0	0	0	0	0	0	0	0	0	0	0	0	0	0
0	0	0	0	0	0	0	0	0	0	0	0	0	0	0	0	0	0	0	0	0	0	0	0	0	0	0	0	0	0	0	0	0	0	0	0	0	0	0	0	0	0	0	0	0	0	0	0	0	0
0	0	0	0	0	0	0	0	0	0	0	0	0	0	0	0	0	0	0	0	0	0	0	0	0	0	0	0	0	0	0	0	0	0	0	0	0	0	0	0	0	0	0	0	0	0	0	0	0	0
0	0	0	0	0	0	0	0	0	0	0	0	0	0	0	0	0	0	0	0	0	0	0	0	0	0	0	0	0	0	0	0	0	0	0	0	0	0	0	0	0	0	0	0	0	0	0	0	0	0
0	0	0	0	0	0	0	0	0	0	0	0	0	0	0	0	0	0	0	0	0	0	0	0	0	0	0	0	0	0	0	0	0	0	0	0	0	0	0	0	0	0	0	0	0	0	0	0	0	0
0	0	0	0	0	0	0	0	0	0	0	0	0	0	0	0	0	0	0	0	0	0	0	0	0	0	0	0	0	0	0	0	0	0	0	0	0	0	0	0	0	0	0	0	0	0	0	0	0	0
0	0	0	0	0	0	0	0	0	0	0	0	0	0	0	0	0	0	0	0	0	0	0	0	0	0	0	0	0	0	0	0	0	0	0	0	0	0	0	0	0	0	0	0	0	0	0	0	0	0
0	0	0	0	0	0	0	0	0	0	0	0	0	0	0	0	0	0	0	0	0	0	0	0	0	0	0	0	0	0	0	0	0	0	0	0	0	0	0	0	0	0	0	0	0	0	0	0	0	0
0	0	0	0	0	0	0	0	0	0	0	0	0	0	0	0	0	0	0	0	0	0	0	0	0	0	0	0	0	0	0	0	0	0	0	0	0	0	0	0	0	0	0	0	0	0	0	0	0	0
0	0	0	0	0	0	0	0	0	0	0	0	0	0	0	0	0	0	0	0	0	0	0	0	0	0	0	0	0	0	0	0	0	0	0	0	0	0	0	0	0	0	0	0	0	0	0	0	0	0
0	0	0	0	0	0	0	0	0	0	0	0	0	0	0	0	0	0	0	0	0	0	0	0	0	0	0	0	0	0	0	0	0	0	0	0	0	0	0	0	0	0	0	0	0	0	0	0	0	0
0	0	0	0	0	0	0	0	0	0	0	0	0	0	0	0	0	0	0	0	0	0	0	0	0	0	0	0	0	0	0	0	0	0	0	0	0	0	0	0	0	0	0	0	0	0	0	0	0	0
0	0	0	0	0	0	0	0	0	0	0	0	0	0	0	0	0	0	0	0	0	0	0	0	0	0	0	0	0	0	0	0	0	0	0	0	0	0	0	0	0	0	0	0	0	0	0	0	0	0
0	0	0	0	0	0	0	0	0	0	0	0	0	0	0	0	0	0	0	0	0	0	0	0	0	0	0	0	0	0	0	0	0	0	0	0	0	0	0	0	0	0	0	0	0	0	0	0	0	0
0	0	0	0	0	0	0	0	0	0	0	0	0	0	0	0	0	0	0	0	0	0	0	0	0	0	0	0	0	0	0	0	0	0	0	0	0	0	0	0	0	0	0	0	0	0	0	0	0	0
0	0	0	0	0	0	0	0	0	0	0	0	0	0	0	0	0	0	0	0	0	0	0	0	0	0	0	0	0	0	0	0	0	0	0	0	0	0	0	0	0	0	0	0	0	0	0	0	0	0
0	0	0	0	0	0	0	0	0	0	0	0	0	0	0	0	0	0	0	0	0	0	0	0	0	0	0	0	0	0	0	0	0	0	0	0	0	0	0	0	0	0	0	0	0	0	0	0	0	0
0	0	0	0	0	0	0	0	0	0	0	0	0	0	0	0	0	0	0	0	0	0	0	0	0	0	0	0	0	0	0	0	0	0	0	0	0	0	0	0	0	0	0	0	0	0	0	0	0	0
0	0	0	0	0	0	0	0	0	0	0	0	0	0	0	0	0	0	0	0	0	0	0	0	0	0	0	0	0	0	0	0	0	0	0	0	0	0	0	0	0	0	0	0	0	0	0	0	0	0
0	0	0	0	0	0	0	0	0	0	0	0	0	0	0	0	0	0	0	0	0	0	0	0	0	0	0	0	0	0	0	0	0	0	0	0	0	0	0	0	0	0	0	0	0	0	0	0	0	0
0	0	0	0	0	0	0	0	0	0	0	0	0	0	0	0	0	0	0	0	0	0	0	0	0	0	0	0	0	0	0	0	0	0	0	0	0	0	0	0	0	0	0	0	0	0	0	0	0	0
0	0	0	0	0	0	0	0	0	0	0	0	0	0	0	0	0	0	0	0	0	0	0	0	0	0	0	0	0	0	0	0	0	0	0	0	0	0	0	0	0	0	0	0	0	0	0	0	0	0
0	0	0	0	0	0	0	0	0	0	0	0	0	0	0	0	0	0	0	0	0	0	0	0	0	0	0	0	0	0	0	0	0	0	0	0	0	0	0	0	0	0	0	0	0	0	0	0	0	0
0	0	0	0	0	0	0	0	0	0	0	0	0	0	0	0	0	0	0	0	0	0	0	0	0	0	0	0	0	0	0	0	0	0	0	0	0	0	0	0	0	0	0	0	0	0	0	0	0	0
0	0	0	0	0	0	0	0	0	0	0	0	0	0	0	0	0	0	0	0	0	0	0	0	0	0	0	0	0	0	0	0	0	0	0	0	0	0	0	0	0	0	0	0	0	0	0	0	0	0
0	0	0	0	0	0	0	0	0	0	0	0	0	0	0	0	0	0	0	0	0	0	0	0	0	0	0	0	0	0	0	0	0	0	0	0	0	0	0	0	0	0	0	0	0	0	0	0	0	0
0	0	0	0	0	0	0	0	0	0	0	0	0	0	0	0	0	0	0	0	0	0	0	0	0	0	0	0	0	0	0	0	0	0	0	0	0	0	0	0	0	0	0	0	0	0	0	0	0	0
0	0	0	0	0	0	0	0	0	0	0	0	0	0	0	0	0	0	0	0	0	0	0	0	0	0	0	0	0	0	0	0	0	0	0	0	0	0	0	0	0	0	0	0	0	0	0	0	0	0
0	0	0	0	0	0	0	0	0	0	0	0	0	0	0	0	0	0	0	0	0	0	0	0	0	0	0	0	0	0	0	0	0	0	0	0	0	0	0	0	0	0	0	0	0	0	0	0	0	0
0	0	0	0	0	0	0	0	0	0	0	0	0	0	0	0	0	0	0	0	0	0	0	0	0	0	0	0	0	0	0	0	0	0	0	0	0	0	0	0	0	0	0	0	0	0	0	0	0	0
0	0	0	0	0	0	0	0	0	0	0	0	0	0	0	0	0	0	0	0	0	0	0	0	0	0	0	0	0	0	0	0	0	0	0	0	0	0	0	0	0	0	0	0	0	0	0	0	0	0
0	0	0	0	0	0	0	0	0	0	0	0	0	0	0	0	0	0	0	0	0	0	0	0	0	0	0	0	0	0	0	0	0	0	0	0	0	0	0	0	0	0	0	0	0	0	0	0	0	0
0	0	0	0	0	0	0	0	0	0	0	0	0	0	0	0	0	0	0	0	0	0	0	0	0	0	0	0	0	0	0	0	0	0	0	0	0	0	0	0	0	0	0	0	0	0	0	0	0	0
0	0	0	0	0	0	0	0	0	0	0	0	0	0	0	0	0	0	0	0	0	0	0	0	0	0	0	0	0	0	0	0	0	0	0	0	0	0	0	0	0	0	0	0	0	0	0	0	0	0
0	0	0	0	0	0	0	0	0	0	0	0	0	0	0	0	0	0	0	0	0	0	0	0	0	0	0	0	0	0	0	0	0	0	0	0	0	0	0	0	0	0	0	0	0	0	0	0	0	0
0	0	0	0	0	0	0	0	0	0	0	0	0	0	0	0	0	0	0	0	0	0	0	0	0	0	0	0	0	0	0	0	0	0	0	0	0	0	0	0	0	0	0	0	0	0	0	0	0	0
0	0	0	0	0	0	0	0	0	0	0	0	0	0	0	0	0	0	0	0	0	0	0	0	0	0	0	0	0	0	0	0	0	0	0	0	0	0	0	0	0	0	0	0	0	0	0	0	0	0
0	0	0	0	0	0	0	0	0	0	0	0	0	0	0	0	0	0	0	0	0	0	0	0	0	0	0	0	0	0	0	0	0	0	0	0	0	0	0	0	0	0	0	0	0	0	0	0	0	0
0	0	0	0	0	0	0	0	0	0	0	0	0	0	0	0	0	0	0	0	0	0	0	0	0	0	0	0	0	0	0	0	0	0	0	0	0	0	0	0	0	0	0	0	0	0	0	0	0	0
0	0	0	0	0	0	0	0	0	0	0	0	0	0	0	0	0	0	0	0	0	0	0	0	0	0	0	0	0	0	0	0	0	0	0	0	0	0	0	0	0	0	0	0	0	0	0	0	0	0
0	0	0	0	0	0	0	0	0	0	0	0	0	0	0	0	0	0	0	0	0	0	0	0	0	0	0	0	0	0	0	0	0	0	0	0	0	0	0	0	0	0	0	0	0	0	0	0	0	0
0	0	0	0	0	0	0	0	0	0	0	0	0	0	0	0	0	0	0	0	0	0	0	0	0	0	0	0	0	0	0	0	0	0	0	0	0	0	0	0	0	0	0	0	0	0	0	0	0	0
0	0	0	0	0	0	0	0	0	0	0	0	0	0	0	0	0	0	0	0	0	0	0	0	0	0	0	0	0	0	0	0	0	0	0	0	0	0	0	0	0	0	0	0	0	0	0	0	0	0
0	0	0	0	0	0	0	0	0	0	0	0	0	0	0	0	0	0	0	0	0	0	0	0	0	0	0	0	0	0	0	0	0	0	0	0	0	0	0	0	0	0	0	0	0	0	0	0	0	0
0	0	0	0	0	0	0	0	0	0	0	0	0	0	0	0	0	0	0	0	0	0	0	0	0	0	0	0	0	0	0	0	0	0	0	0	0	0	0	0	0	0	0	0	0	0	0	0	0	0
0	0	0	0	0	0	0	0	0	0	0	0	0	0	0	0	0	0	0	0	0	0	0	0	0	0	0	0	0	0	0	0	0	0	0	0	0	0	0	0	0	0	0	0	0	0	0	0	0	0
0	0	0	0	0	0	0	0	0	0	0	0	0	0	0	0	0	0	0	0	0	0	0	0	0	0	0	0	0	0	0	0	0	0	0	0	0	0	0	0	0	0	0	0	0	0	0	0	0	0
0	0	0	0	0	0	0	0	0	0	0	0	0	0	0	0	0	0	0	0	0	0	0	0	0	0	0	0	0	0	0	0	0	0	0	0	0	0	0	0	0	0	0	0	0	0	0	0	0	0
0	0	0	0	0	0	0	0	0	0	0	0	0	0	0	0	0	0	0	0	0	0	0	0	0	0	0	0	0	0	0	0	0	0	0	0	0	0	0	0	0	0	0	0	0	0	0	0	0	0
0	0	0	0	0	0	0	0	0	0	0	0	0	0	0	0	0	0	0	0	0	0	0	0	0	0	0	0	0	0	0	0	0	0	0	0	0	0	0	0	0	0	0	0	0	0	0	0	0	0
0	0	0	0	0	0	0	0	0	0	0	0	0	0	0	0	0	0	0	0	0	0	0	0	0	0	0	0	0	0	0	0	0	0	0	0	0	0	0	0	0	0	0	0	0	0	0	0	0	0
0	0	0	0	0	0	0	0	0	0	0	0	0	0	0	0	0	0	0	0	0	0	0	0	0	0	0	0	0	0	0	0	0	0	0	0	0	0	0	0	0	0	0	0	0	0	0	0	0	0
0	0	0	0	0	0	0	0	0	0	0	0	0	0	0	0	0	0	0	0	0	0	0	0	0	0	0	0	0	0	0	0	0	0	0	0	0	0	0	0	0	0	0	0	0	0	0	0	0	0
0	0	0	0	0	0	0	0	0	0	0	0	0	0	0	0	0	0	0	0	0	0	0	0	0	0	0	0	0	0	0	0	0	0	0	0	0	0	0	0	0	0	0	0	0	0	0	0	0	0
0	0	0	0	0	0	0	0	0	0	0	0	0	0	0	0	0	0	0	0	0	0	0	0	0	0	0	0	0	0	0	0	0	0	0	0	0	0	0	0	0	0	0	0	0	0	0	0	0	0
0	0	0	0	0	0	0	0	0	0	0	0	0	0	0	0	0	0	0	0	0	0	0	0	0	0	0	0	0	0	0	0	0	0	0	0	0	0	0	0	0	0	0	0	0	0	0	0	0	0
0	0	0	0	0	0	0	0	0	0	0	0	0	0	0	0	0	0	0	0	0	0	0	0	0	0	0	0	0	0	0	0	0	0	0	0	0	0	0	0	0	0	0	0	0	0	0	0	0	0
0	0	0	0	0	0	0	0	0	0	0	0	0	0	0	0	0	0	0	0	0	0	0	0	0	0	0	0	0	0	0	0	0	0	0	0	0	0	0	0	0	0	0	0	0	0	0	0	0	0
0	0	0	0	0	0	0	0	0	0	0	0	0	0	0	0	0	0	0	0	0	0	0	0	0	0	0	0	0	0	0	0	0	0	0	0	0	0	0	0	0	0	0	0	0	0	0	0	0	0
0	0	0	0	0	0	0	0	0	0	0	0	0	0	0	0	0	0	0	0	0	0	0	0	0	0	0	0	0	0	0	0	0	0	0	0	0	0	0	0	0	0	0	0	0	0	0	0	0	0
0	0	0	0	0	0	0	0	0	0	0	0	0	0	0	0	0	0	0	0	0	0	0	0	0	0	0	0	0	0	0	0	0	0	0	0	0	0	0	0	0	0	0	0	0	0	0	0	0	0
0	0	0	0	0	0	0	0	0	0	0	0	0	0	0	0	0	0	0	0	0	0	0	0	0	0	0	0	0	0	0	0	0	0	0	0	0	0	0	0	0	0	0	0	0	0	0	0	0	0
0	0	0	0	0	0	0	0	0	0	0	0	0	0	0	0	0	0	0	0	0	0	0	0	0	0	0	0	0	0	0	0	0	0	0	0	0	0	0	0	0	0	0	0	0	0	0	0	0	0
0	0	0	0	0	0	0	0	0	0	0	0	0	0	0	0	0	0	0	0	0	0	0	0	0	0	0	0	0	0	0	0	0	0	0	0	0	0	0	0	0	0	0	0	0	0	0	0	0	0
0	0	0	0	0	0	0	0	0	0	0	0	0	0	0	0	0	0	0	0	0	0	0	0	0	0	0	0	0	0	0	0	0	0	0	0	0	0	0	0	0	0	0	0	0	0	0	0	0	0
0	0	0	0	0	0	0	0	0	0	0	0	0	0	0	0	0	0	0	0	0	0	0	0	0	0	0	0	0	0	0	0	0	0	0	0	0	0	0	0	0	0	0	0	0	0	0	0	0	0
0	0	0	0	0	0	0	0	0	0	0	0	0	0	0	0	0	0	0	0	0	0	0	0	0	0	0	0	0	0	0	0	0	0	0	0	0	0	0	0	0	0	0	0	0	0	0	0	0	0
0	0	0	0	0	0	0	0	0	0	0	0	0	0	0	0	0	0	0	0	0	0	0	0	0	0	0	0	0	0	0	0	0	0	0	0	0	0	0	0	0	0	0	0	0	0	0	0	0	0
0	0	0	0	0	0	0	0	0	0	0	0	0	0	0	0	0	0	0	0	0	0	0	0	0	0	0	0	0	0	0	0	0	0	0	0	0	0	0	0	0	0	0	0	0	0	0	0	0	0
0	0	0	0	0	0	0	0	0	0	0	0	0	0	0	0	0	0	0	0	0	0	0	0	0	0	0	0	0	0	0	0	0	0	0	0	0	0	0	0	0	0	0	0	0	0	0	0	0	0
0	0	0	0	0	0	0	0	0	0	0	0	0	0	0	0	0	0	0	0	0	0	0	0	0	0	0	0	0	0	0	0	0	0	0	0	0	0	0	0	0	0	0	0	0	0	0	0	0	0
0	0	0	0	0	0	0	0	0	0	0	0	0	0	0	0	0	0	0	0	0	0	0	0	0	0	0	0	0	0	0	0	0	0	0	0	0	0	0	0	0	0	0	0	0	0	0	0	0	0
0	0	0	0	0	0	0	0	0	0	0	0	0	0	0	0	0	0	0	0	0	0	0	0	0	0	0	0	0	0	0	0	0	0	0	0	0	0	0	0	0	0	0	0	0	0	0	0	0	0
0	0	0	0	0	0	0	0	0	0	0	0	0	0	0	0	0	0	0	0	0	0	0	0	0	0	0	0	0	0	0	0	0	0	0	0	0	0	0	0	0	0	0	0	0	0	0	0	0	0
0	0	0	0	0	0	0	0	0	0	0	0	0	0	0	0	0	0	0	0	0	0	0	0	0	0	0	0	0	0	0	0	0	0	0	0	0	0	0	0	0	0	0	0	0	0	0	0	0	0
0	0	0	0	0	0	0	0	0	0	0	0	0	0	0	0	0	0	0	0	0	0	0	0	0	0	0	0	0	0	0	0	0	0	0	0	0	0	0	0	0	0	0	0	0	0	0	0	0	0
0	0	0	0	0	0	0	0	0	0	0	0	0	0	0	0	0	0	0	0	0	0	0	0	0	0	0	0	0	0	0	0	0	0	0	0	0	0	0	0	0	0	0	0	0	0	0	0	0	0
0	0	0	0	0	0	0	0	0	0	0	0	0	0	0	0	0	0	0	0	0	0	0	0	0	0	0	0	0	0	0	0	0	0	0	0	0	0	0	0	0	0	0	0	0	0	0	0	0	0
0	0	0	0	0	0	0	0	0	0	0	0	0	0	0	0	0	0	0	0	0	0	0	0	0	0	0	0	0	0	0	0	0	0	0	0	0	0	0	0	0	0	0	0	0	0	0	0	0	0
0	0	0	0	0	0	0	0	0	0	0	0	0	0	0	0	0	0	0	0	0	0	0	0	0	0	0	0	0	0	0	0	0	0	0	0	0	0	0	0	0	0	0	0	0	0	0	0	0	0
0	0	0	0	0	0	0	0	0	0	0	0	0	0	0	0	0	0	0	0	0	0	0	0	0	0	0	0	0	0	0	0	0	0	0	0	0	0	0	0	0	0	0	0	0	0	0	0	0	0
0	0	0	0	0	0	0	0	0	0	0	0	0	0	0	0	0	0	0	0	0	0	0	0	0	0	0	0	0	0	0	0	0	0	0	0	0	0	0	0	0	0	0	0	0	0	0	0	0	0
0	0	0	0	0	0	0	0	0	0	0	0	0	0	0	0	0	0	0	0	0	0	0	0	0	0	0	0	0	0	0	0	0	0	0	0	0	0	0	0	0	0	0	0	0	0	0	0	0	0
0	0	0	0	0	0	0	0	0	0	0	0	0	0	0	0	0	0	0	0	0	0	0	0	0	0	0	0	0	0	0	0	0	0	0	0	0	0	0	0	0	0	0	0	0	0	0	0	0	0
0	0	0	0	0	0	0	0	0	0	0	0	0	0	0	0	0	0	0	0	0	0	0	0	0	0	0	0	0	0	0	0	0	0	0	0	0	0	0	0	0	0	0	0	0	0	0	0	0	0
0	0	0	0	0	0	0	0	0	0	0	0	0	0	0	0	0	0	0	0	0	0	0	0	0	0	0	0	0	0	0	0	0	0	0	0	0	0	0	0	0	0	0	0	0	0	0	0	0	0
0	0	0	0	0	0	0	0	0	0	0	0	0	0	0	0	0	0	0	0	0	0	0	0	0	0	0	0	0	0	0	0	0	0	0	0	0	0	0	0	0	0	0	0	0	0	0	0	0	0
0	0	0	0	0	0	0	0	0	0	0	0	0	0	0	0	0	0	0	0	0	0	0	0	0	0	0	0	0	0	0	0	0	0	0	0	0	0	0	0	0	0	0	0	0	0	0	0	0	0
0	0	0	0	0	0	0	0	0	0	0	0	0	0	0	0	0	0	0	0	0	0	0	0	0	0	0	0	0	0	0	0	0	0	0	0	0	0	0	0	0	0	0	0	0	0	0	0	0	0
0	0	0	0	0	0	0	0	0	0	0	0	0	0	0	0	0	0	0	0	0	0	0	0	0	0	0	0	0	0	0	0	0	0	0	0	0	0	0	0	0	0	0	0	0	0	0	0	0	0
0	0	0	0	0	0	0	0	0	0	0	0	0	0	0	0	0	0	0	0	0	0	0	0	0	0	0	0	0	0	0	0	0	0	0	0	0	0	0	0	0	0	0	0	0	0	0	0	0	0
0	0	0	0	0	0	0	0	0	0	0	0	0	0	0	0	0	0	0	0	0	0	0	0	0	0	0	0	0	0	0	0	0	0	0	0	0	0	0	0	0	0	0	0	0	0	0	0	0	0
0	0	0	0	0	0	0	0	0	0	0	0	0	0	0	0	0	0	0	0	0	0	0	0	0	0	0	0	0	0	0	0	0	0	0	0	0	0	0	0	0	0	0	0	0	0	0	0	0	0
0	0	0	0	0	0	0	0	0	0	0	0	0	0	0	0	0	0	0	0	0	0	0	0	0	0	0	0	0	0	0	0	0	0	0	0	0	0	0	0	0	0	0	0	0	0	0	0	0	0
0	0	0	0	0	0	0	0	0	0	0	0	0	0	0	0	0	0	0	0	0	0	0	0	0	0	0	0	0	0	0	0	0	0	0	0	0	0	0	0	0	0	0	0	0	0	0	0	0	0
0	0	0	0	0	0	0	0	0	0	0	0	0	0	0	0	0	0	0	0	0	0	0	0	0	0	0	0	0	0	0	0	0	0	0	0	0	0	0	0	0	0	0	0	0	0	0	0	0	0
0	0	0	0	0	0	0	0	0	0	0	0	0	0	0	0	0	0	0	0	0	0	0	0	0	0	0	0	0	0	0	0	0	0	0	0	0	0	0	0	0	0	0	0	0	0	0	0	0	0
0	0	0	0	0	0	0	0	0	0	0	0	0	0	0	0	0	0	0	0	0	0	0	0	0	0	0	0	0	0	0	0	0	0	0	0	0	0	0	0	0	0	0	0	0	0	0	0	0	0
0	0	0	0	0	0	0	0	0	0	0	0	0	0	0	0	0	0	0	0	0	0	0	0	0	0	0	0	0	0	0	0	0	0	0	0	0	0	0	0	0	0	0	0	0	0	0	0	0	0
0	0	0	0	0	0	0	0	0	0	0	0	0	0	0	0	0	0	0	0	0	0	0	0	0	0	0	0	0	0	0	0	0	0	0	0	0	0	0	0	0	0	0	0	0	0	0	0	0	0
0	0	0	0	0	0	0	0	0	0	0	0	0	0	0	0	0	0	0	0	0	0	0	0	0	0	0	0	0	0	0	0	0	0	0	0	0	0	0	0	0	0	0	0	0	0	0	0	0	0
0	0	0	0	0	0	0	0	0	0	0	0	0	0	0	0	0	0	0	0	0	0	0	0	0	0	0	0	0	0	0	0	0	0	0	0	0	0	0	0	0	0	0	0	0	0	0	0	0	0
0	0	0	0	0	0	0	0	0	0	0	0	0	0	0	0	0	0	0	0	0	0	0	0	0	0	0	0	0	0	0	0	0	0	0	0	0	0	0	0	0	0	0	0	0	0	0	0	0	0
0	0	0	0	0	0	0	0	0	0	0	0	0	0	0	0	0	0	0	0	0	0	0	0	0	0	0	0	0	0	0	0	0	0	0	0	0	0	0	0	0	0	0	0	0	0	0	0	0	0
0	0	0	0	0	0	0	0	0	0	0	0	0	0	0	0	0	0	0	0	0	0	0	0	0	0	0	0	0	0	0	0	0	0	0	0	0	0	0	0	0	0	0	0	0	0	0	0	0	0
0	0	0	0	0	0	0	0	0	0	0	0	0	0	0	0	0	0	0	0	0	0	0	0	0	0	0	0	0	0	0	0	0	0	0	0	0	0	0	0	0	0	0	0	0	0	0	0	0	0
0	0	0	0	0	0	0	0	0	0	0	0	0	0	0	0	0	0	0	0	0	0	0	0	0	0	0	0	0	0	0	0	0	0	0	0	0	0	0	0	0	0	0	0	0	0	0	0	0	0
0	0	0	0	0	0	0	0	0	0	0	0	0	0	0	0	0	0	0	0	0	0	0	0	0	0	0	0	0	0	0	0	0	0	0	0	0	0	0	0	0	0	0	0	0	0	0	0	0	0
0	0	0	0	0	0	0	0	0	0	0	0	0	0	0	0	0	0	0	0	0	0	0	0	0	0	0	0	0	0	0	0	0	0	0	0	0	0	0	0	0	0	0	0	0	0	0	0	0	0
0	0	0	0	0	0	0	0	0	0	0	0	0	0	0	0	0	0	0	0	0	0	0	0	0	0	0	0	0	0	0	0	0	0	0	0	0	0	0	0	0	0	0	0	0	0	0	0	0	0
0	0	0	0	0	0	0	0	0	0	0	0	0	0	0	0	0	0	0	0	0	0	0	0	0	0	0	0	0	0	0	0	0	0	0	0	0	0	0	0	0	0	0	0	0	0	0	0	0	0
0	0	0	0	0	0	0	0	0	0	0	0	0	0	0	0	0	0	0	0	0	0	0	0	0	0	0	0	0	0	0	0	0	0	0	0	0	0	0	0	0	0	0	0	0	0	0	0	0	0
0	0	0	0	0	0	0	0	0	0	0	0	0	0	0	0	0	0	0	0	0	0	0	0	0	0	0	0	0	0	0	0	0	0	0	0	0	0	0	0	0	0	0	0	0	0	0	0	0	0
0	0	0	0	0	0	0	0	0	0	0	0	0	0	0	0	0	0	0	0	0	0	0	0	0	0	0	0	0	0	0	0	0	0	0	0	0	0	0	0	0	0	0	0	0	0	0	0	0	0
0	0	0	0	0	0	0	0	0	0	0	0	0	0	0	0	0	0	0	0	0	0	0	0	0	0	0	0	0	0	0	0	0	0	0	0	0	0	0	0	0	0	0	0	0	0	0	0	0	0
0	0	0	0	0	0	0	0	0	0	0	0	0	0	0	0	0	0	0	0	0	0	0	0	0	0	0	0	0	0	0	0	0	0	0	0	0	0	0	0	0	0	0	0	0	0	0	0	0	0
0	0	0	0	0	0	0	0	0	0	0	0	0	0	0	0	0	0	0	0	0	0	0	0	0	0	0	0	0	0	0	0	0	0	0	0	0	0	0	0	0	0	0	0	0	0	0	0	0	0
0	0	0	0	0	0	0	0	0	0	0	0	0	0	0	0	0	0	0	0	0	0	0	0	0	0	0	0	0	0	0	0	0	0	0	0	0	0	0	0	0	0	0	0	0	0	0	0	0	0
0	0	0	0	0	0	0	0	0	0	0	0	0	0	0	0	0	0	0	0	0	0	0	0	0	0	0	0	0	0	0	0	0	0	0	0	0	0	0	0	0	0	0	0	0	0	0	0	0	0
0	0	0	0	0	0	0	0	0	0	0	0	0	0	0	0	0	0	0	0	0	0	0	0	0	0	0	0	0	0	0	0	0	0	0	0	0	0	0	0	0	0	0	0	0	0	0	0	0	0
0	0	0	0	0	0	0	0	0	0	0	0	0	0	0	0	0	0	0	0	0	0	0	0	0	0	0	0	0	0	0	0	0	0	0	0	0	0	0	0	0	0	0	0	0	0	0	0	0	0
0	0	0	0	0	0	0	0	0	0	0	0	0	0	0	0	0	0	0	0	0	0	0	0	0	0	0	0	0	0	0	0	0	0	0	0	0	0	0	0	0	0	0	0	0	0	0	0	0	0
0	0	0	0	0	0	0	0	0	0	0	0	0	0	0	0	0	0	0	0	0	0	0	0	0	0	0	0	0	0	0	0	0	0	0	0	0	0	0	0	0	0	0	0	0	0	0	0	0	0
0	0	0	0	0	0	0	0	0	0	0	0	0	0	0	0	0	0	0	0	0	0	0	0	0	0	0	0	0	0	0	0	0	0	0	0	0	0	0	0	0	0	0	0	0	0	0	0	0	0
0	0	0	0	0	0	0	0	0	0	0	0	0	0	0	0	0	0	0	0	0	0	0	0	0	0	0	0	0	0	0	0	0	0	0	0	0	0	0	0	0	0	0	0	0	0	0	0	0	0
0	0	0	0	0	0	0	0	0	0	0	0	0	0	0	0	0	0	0	0	0	0	0	0	0	0	0	0	0	0	0	0	0	0	0	0	0	0	0	0	0	0	0	0	0	0	0	0	0	0
0	0	0	0	0	0	0	0	0	0	0	0	0	0	0	0	0	0	0	0	0	0	0	0	0	0	0	0	0	0	0	0	0	0	0	0	0	0	0	0	0	0	0	0	0	0	0	0	0	0
0	0	0	0	0	0	0	0	0	0	0	0	0	0	0	0	0	0	0	0	0	0	0	0	0	0	0	0	0	0	0	0	0	0	0	0	0	0	0	0	0	0	0	0	0	0	0	0	0	0
0	0	0	0	0	0	0	0	0	0	0	0	0	0	0	0	0	0	0	0	0	0	0	0	0	0	0	0	0	0	0	0	0	0	0	0	0	0	0	0	0	0	0	0	0	0	0	0	0	0
[truncated: 740 more columns]

## Sheet: Fig. 3g
1	95432.4	20465.8
2	95479.6	20548.1
3	95490.4	20554.4
4	95510.5	20590.5
5	95525.1	20654.7
6	95548.7	20692.3
7	95563	20702.9
8	95577.1	20789
9	95584.2	20799.2
10	95597.1	20828.6
11	95602.9	20833.8
12	95619.4	20850.1
13	95628.6	20875.1
14	95641.1	20901.5
15	95666	20912.1
16	95675.7	20947.5
17	95769.2	21014
18	95821.7	21021.7
19	95836.7	21106.5
20	95848	21114.7
21	95858.8	21157.6
22	95864.4	21166.8
23	95871.9	21183.4
24	95882.3	21195.6
25	95893.8	21201.1
26	95916.3	21225.8
27	95931.6	21595.7
28	95939.7	22107.9
29	95946.9	22205.8

## Sheet: Fig. 3h
-0.07725	0	-1.60431	0
0.55853	0.02058	-0.51455	0.02438
1.19432	0.07211	0.5752	0.07858
1.8301	0.15916	1.66496	0.1592
2.46589	0.24073	2.75472	0.2155
3.10167	0.26499	3.84448	0.19552
3.73746	0.23456	4.93423	0.12537
4.37325	0.18204	6.02399	0.06071
5.00903	0.12793	7.11375	0.01854
5.64482	0.08585	8.20351	0.00584
6.2806	0.04766	9.29327	0.00116
6.91639	0.02078	10.383	0
7.55217	0.00965	11.4728	0
8.18796	0.00949	12.5625	0
8.82375	0.0143	13.6523	0
9.45953	0.01623	14.7421	0
10.0953	0.0143	15.8318	0
10.7311	0.00949	16.9216	0
11.3669	0.00417	18.0113	0
12.0027	0.00137	19.1011	0
12.6385	0	20.1909	0
13.2742	0	21.2806	0
13.91	0	22.3704	0
14.5458	0	23.4601	0
15.1816	0	24.5499	0
15.8174	0	25.6396	0
16.4532	0	26.7294	0
17.089	0	27.8192	0
17.7247	0	28.9089	0
18.3605	0	29.9987	0
18.9963	0	31.0884	0
19.6321	0	32.1782	0
20.2679	0	33.2679	0
20.9037	0	34.3577	0
21.5395	0	35.4475	0
22.1752	0	36.5372	0
22.811	0	37.627	0
23.4468	0	38.7167	0
24.0826	0	39.8065	0
24.7184	0	40.8963	0
25.3542	0	41.986	0
25.99	0	43.0758	0
26.6257	0	44.1655	0
27.2615	0	45.2553	0
27.8973	0	46.345	0
28.5331	0	47.4348	0
29.1689	0	48.5245	0
29.8047	0	49.6143	0
30.4405	0	50.7041	0
31.0762	0	51.7938	0
31.712	0.00137	52.8836	0.00116
32.3478	0.00417	53.9733	0.00352
32.9836	0.00812	55.0631	0.00686
33.6194	0.01014	56.1529	0.00857
34.2552	0.00812	57.2426	0.00686
34.891	0.00417	58.3324	0.00352
35.5267	0.00137	59.4221	0.00116
36.1625	0	60.5119	0

## Sheet: Fig. 3i
0.454	2.80093e-11
0.555	1.63511e-13
0.641	5.5029e-16
0.72	1.10852e-18
0.793	1.40376e-21
0.862	1.18681e-24
0.928	7.19192e-28
0.993	3.38852e-31
1.055	1.35946e-34
1.117	5.13022e-38
1.177	2.02643e-41
1.237	9.37693e-45
1.295	5.71109e-48
1.354	5.153e-51
1.412	7.74751e-54
1.469	2.17631e-56
1.527	1.27319e-58
1.584	1.71448e-60
1.641	5.80828e-62
1.699	5.33727e-63
1.756	1.41167e-63
1.813	1.12033e-63
1.871	2.72786e-63
1.928	2.04152e-62
1.986	4.60715e-61
2.044	3.01163e-59
2.103	5.36624e-57
2.161	2.4051e-54
2.22	2.457e-51
2.279	5.10085e-48
2.338	1.89203e-44
2.398	1.0899e-40
2.458	8.40212e-37
2.519	7.42737e-33
2.58	6.43342e-29
2.642	4.66692e-25
2.703	2.43092e-21
2.766	7.84077e-18
2.829	1.36195e-14
2.892	1.12061e-11
2.956	3.90034e-09
3.02	5.23127e-07
3.085	2.51354e-05
3.15	0.000404228
3.216	0.00198
3.283	0.00265
3.35	0.000938158
3.418	9.30688e-05
3.486	2.72632e-06
3.555	2.43089e-08
3.624	6.75397e-11
3.695	6.06275e-14
3.765	1.85573e-17
3.837	2.07226e-21
3.909	9.11813e-26
3.982	1.71943e-30
4.056	1.51944e-35
4.13	6.90731e-41
4.205	1.77782e-46
4.281	2.85517e-52
4.357	3.15368e-58
4.435	2.63832e-64
4.513	1.83746e-70
4.592	1.16775e-76
4.671	7.3969e-83
4.752	5.07961e-89
4.833	4.09409e-95
4.915	4.1711e-101
4.998	5.75365e-107
5.082	1.14438e-112
5.166	3.47457e-118
5.252	1.69475e-123
5.338	1.38917e-128
5.426	1.98995e-133
5.514	5.15042e-138
5.603	2.47616e-142
5.693	2.26109e-146
5.784	3.98915e-150
5.876	1.37643e-153
5.969	9.35893e-157
6.063	1.25812e-159
6.158	3.34152e-162
6.255	1.74586e-164
6.352	1.78074e-166
6.45	3.50837e-168

## Sheet: Fig. 4b
1	2264
2	284.7
3	137.2
4	95.3
5	85.3
6	82.1
Internal diagram
2264	321.2	284.7	151.5	137.2	109.3	95.3	107.6
2294	280.4	296.6	172.6	144.2	127.1	103	125.3
2376	344.7	307.3	194.9	151.6	147.8	111.3	145.3
2399	369.4	319.3	222.6	159.7	172.5	121	169.2
2436	423.4	331.2	254.3	168.8	201.3	132.3	196.9
2451	474.4	343.4	291.8	179.4	235.3	146.3	229.5
2483	527.5	355.8	336.6	192	275.9	163.8	267.8
2519	570.5	368.8	390.8	207.8	324.8	186.1	312.5
2560	632.2	383.1	456.4	227.9	382.7	215.1	363.7
2612	707.8	399.5	536.7	254	451.3	253.3	421.3
2661	803.9	418.3	633.7	288.6	532	303.6	484.4
2703	923.7	441.9	748.5	336.4	623.4	369.5	549.8
2752	1062	472.7	885.4	401.8	726.4	453.4	614.3
2806	1224	511.8	1050	487.6	841.2	555.4	674.3
2868	1412	562.4	1249	598.7	964.1	674.2	723.8
2939	1636	629.1	1485	740	1089	806.4	756.3
3014	1899	718.7	1764	914.9	1207	945.6	767.1
3094	2210	841.9	2090	1123	1305	1084	753.5
3185	2588	1011	2468	1360	1372	1214	717.3
3279	3038	1241	2902	1613	1401	1330	664.5
3382	3570	1549	3390	1868	1388	1427	601.3
3509	4215	1957	3923	2112	1334	1504	534
3668	4989	2490	4480	2331	1246	1565	467.6
3886	5915	3174	5027	2521	1130	1612	404.1
4167	7022	4009	5523	2677	1002	1646	345.9
4528	8352	4986	5925	2798	876.7	1672	295.7
4999	9941	6074	6188	2890	760.1	1692	252.9
5630	11830	7222	6268	2959	656	1708	216.8
6464	14010	8354	6158	3011	565.5	1720	186.7
7605	16540	9411	5867	3050	487.7	1730	161.5
9196	19420	10350	5435	3081	421	1737	140.1
11350	22640	11140	4916	3107	364.7	1744	122
14090	26150	11780	4371	3128	317.8	1750	107.2
17460	29740	12260	3852	3145	279.7	1756	95.27
21910	33450	12640	3346	3161	245.2	1761	83.74
27390	36840	12940	2836	3175	207.2	1766	68.79
33640	39510	13170	2377	3189	172.9	1771	54.74
40740	41240	13340	2006	3201	149.9	1776	46.83
48900	42470	13490	1704	3216	136.4	1781	44.12
56490	42700	13620	1492	3230	129.7	1786	43.91
62920	41560	13690	1341	3238	125	1789	43.98
68980	39710	13750	1209	3246	121.7	1792	44.36
74270	37360	13800	1093	3255	119.3	1796	44.78
79580	34560	13860	983.8	3265	118.2	1800	45.4
84330	31610	13920	901.7	3277	117.6	1805	45.93
87940	29020	13990	841.2	3289	117	1810	47.05
92910	23710	14010	731.5	3298	113.4	1816	48.53
97050	19310	14040	651.2	3309	109.5	1822	48.95
98640	18720	14130	652.3	3324	110.1	1827	48.96
99770	17720	14200	646.6	3340	112.4	1832	49.85
100900	17060	14270	653.1	3356	116.7	1838	51.66
104200	16470	14340	637.1	3372	123.4	1846	53.97
107000	15390	14420	626.4	3388	129.6	1853	56.57
108600	14760	14500	638	3404	133.5	1861	59.29
110100	14220	14580	648.3	3421	138.2	1869	62.14
110500	13120	14670	676.8	3442	143.8	1878	65.09
110700	11620	14770	712.5	3464	150.2	1889	67.88
110900	9897	14860	744.4	3485	158.3	1899	71.37
111400	8866	14960	767.1	3507	165.1	1910	73.79
112200	8623	15060	783.3	3529	166.6	1920	73.14
113000	8408	15160	810	3552	169.4	1931	73.23
113800	8683	15250	862.3	3575	178.9	1941	76.77
114900	9134	15350	925.9	3601	192.5	1952	82.36
116200	9625	15470	1002	3628	207.9	1964	88.95
117400	10040	15620	1089	3657	222.9	1977	95.29
118600	10290	15770	1175	3687	236.9	1991	100.9
119800	10630	15930	1240	3719	250	2006	105.6
121200	10920	16060	1301	3753	262.4	2021	110.2
122600	11320	16190	1359	3789	272.7	2035	114.8
123900	11760	16380	1406	3824	281.8	2050	119
125200	12120	16580	1450	3857	290.5	2066	122.9
126900	12520	16790	1488	3887	298.3	2083	126.7

## Sheet: Fig. 4c
1	2140
2	338
3	142
4	90
5	66
6	39
Internal diagram
2140	410.7	338.4	143.8	142.2	108.3	89.58	88.66
2181	489.5	348.3	160.5	146.9	126.2	93.38	103.7
2237	513.7	357.8	182.3	151.9	146.7	98.51	121.3
2266	547.2	368	208.1	157.1	172.1	102.5	142.5
2324	577.5	378.5	238.7	162.8	201.7	107.1	167.7
2374	629.2	389.4	274.6	169.3	237.1	111.6	197.9
2423	694.4	400.8	317.4	176.4	279.4	116.6	234.1
2471	755.7	412.4	368.4	184.2	330.7	122.5	277.8
2524	827.9	424.4	429.1	192.7	391.7	129.3	330.3
2595	923.8	438.2	502.9	202	465.3	136.7	393
2666	1047	453.8	591.3	212.5	553.8	145.1	468.5
2731	1184	471.5	696	226.1	658.5	156.7	558.4
2801	1336	490.6	821.7	243.5	784.2	172.6	666
2871	1518	510.9	974.4	263.8	936.2	192.2	796.1
2945	1737	532.9	1159	288	1119	216.6	952.6
3027	2002	557.9	1382	317.9	1339	247.6	1140
3115	2318	586.7	1648	355.9	1602	288.9	1364
3207	2695	621.3	1967	406.5	1916	345.7	1629
3301	3139	662.7	2349	471.3	2292	421.9	1946
3410	3676	712.1	2807	555.4	2743	524.1	2321
3530	4308	773.7	3361	667.9	3279	663.3	2761
3644	5059	849.8	4030	820.8	3913	850.8	3277
3756	5975	942.7	4838	1032	4664	1104	3869
3893	7077	1075	5806	1325	5552	1452	4544
4063	8399	1253	6955	1719	6590	1916	5304
4252	10000	1477	8341	2248	7803	2525	6145
4467	11940	1767	10010	2956	9196	3312	7048
4711	14290	2149	12020	3909	10760	4312	7973
4992	17090	2657	14380	5148	12460	5525	8855
5386	20470	3355	17200	6764	14250	6972	9631
5900	24550	4350	20550	8811	16070	8625	10240
6498	29500	5731	24500	11360	17780	10420	10610
7204	35400	7534	29090	14360	19260	12270	10720
8047	42260	9830	34220	17610	20350	14030	10570
9266	50910	13130	40300	21250	20970	15730	10180
10970	61120	17600	46980	25020	21020	17290	9562
13180	72930	23190	53960	28580	20550	18640	8857
16210	86970	30110	61610	31860	19740	19810	8186
20720	105100	38940	69940	34790	18780	20790	7585
25700	126900	49950	77710	37300	17630	21660	7034
31350	150900	62590	83770	39460	16280	22460	6512
39170	178300	76640	88170	41400	14940	23200	6012
50040	210200	91700	90810	43130	13690	23900	5512
66140	246900	107000	91040	44730	12550	24540	5000
86330	291600	122100	89090	46160	11500	25110	4493
112800	344400	136600	85880	47430	10490	25600	3993
201500	448200	147600	85700	48960	9675	26020	3543
285200	541000	157900	83010	50290	8672	26390	3067
319100	578300	169500	74470	51070	7439	26680	2568
371500	582400	178000	65560	51780	6383	26910	2161
453300	601200	185600	57440	52290	5483	27070	1826
502600	650100	196200	52210	52610	4540	27190	1540
582000	698500	204500	47820	52860	3731	27270	1304
792800	755900	210300	43170	52990	3277	27300	1118
961200	761900	214600	39250	53100	2828	27330	952.2
1074000	744700	216500	35240	53280	2410	27380	819.3
1202000	720000	218700	30690	53460	2093	27440	717.9
1264000	686000	220800	25250	53590	1750	27480	641.9
1328000	652300	223000	20530	53680	1421	27510	559.7
1438000	611500	224500	18020	53780	1130	27550	434.7
113000	8408	15160	810	53860	839.6	27580	321
113800	8683	15250	862.3	53920	687.9	27610	263.1
114900	9134	15350	925.9	53970	640.9	27640	248.6
116200	9625	15470	1002	54030	601.5	27680	257.3
117400	10040	15620	1089	54080	573.8	27710	270.5
118600	10290	15770	1175	54110	553.2	27750	280.3
119800	10630	15930	1240	54140	530.6	27790	288.1
121200	10920	16060	1301	54210	522.4	27820	295.8
122600	11320	16190	1359	54300	527.7	27860	300.8
123900	11760	16380	1406	54370	529.6	27900	300.2
125200	12120	16580	1450	54400	518.3	27950	300.4
126900	12520	16790	1488	54400	485.4	27970	305

## Sheet: Fig. 4d
142.2	108.3	142.001	107.531
146.9	126.2	146.594	125.721
151.9	146.7	151.621	146.933
157.1	172.1	157.223	172.381
162.8	201.7	163.285	202.302
169.3	237.1	169.893	237.952
176.4	279.4	177.038	280.213
184.2	330.7	184.948	331.472
192.7	391.7	193.422	391.267
202	465.3	202.974	463.874
212.5	553.8	213.991	552.75
226.1	658.5	226.48	657.536
243.5	784.2	241.408	784.775
263.8	936.2	259.494	937.523
288	1119	281.798	1119.7
317.9	1339	310.637	1342.36
355.9	1602	347.762	1607.88
406.5	1916	396.766	1927.19
471.3	2292	461.674	2307.38
555.4	2743	550.211	2768.21
667.9	3279	666.664	3302.64
820.8	3913	826.259	3944.28
1032	4664	1047.14	4715.96
1325	5552	1340.97	5603.62
1719	6590	1741.99	6646.51
2248	7803	2266.33	7815.82
2956	9196	3001.03	9209.44
3909	10760	3951.32	10729.3
5148	12460	5229.76	12435.8
6764	14250	6753.31	14118.5
8811	16070	8850.19	15993.9
11360	17780	11204.3	17652.2
14360	19260	14182.6	19235
17610	20350	17212.7	20369.5
21250	20970	20610.8	21157.9
25020	21020	24833.4	21500.7
28580	20550	28035.7	21314.7
31860	19740	31517.5	20676
34790	18780	34735.1	19662.4
37300	17630	37607.2	18383.4
39460	16280	40116.7	16942.1
41400	14940	42270.6	15430.5
43130	13690	44081.7	13934
44730	12550	45621.8	12476.6
46160	11500	46877.2	11147.1
47430	10490	47943.4	9908.17
48960	9675	48852.8	8766.45
50290	8672	49603.5	7763.52
51070	7439	50246.8	6861.62
51780	6383	50794.8	6064.69
52290	5483	51267	5360.06
52610	4540	51675.2	4740.71
52860	3731	52031.6	4195.15
52990	3277	52345	3714.53
53100	2828	52619.8	3294.45
53280	2410	52866.7	2920.22
53460	2093	53080.6	2599.51
53590	1750	53274.3	2313.14
53680	1421	53450.7	2056.68
53780	1130	53605.6	1835.26
53860	839.6	53746.3	1637.87
53920	687.9	53872.7	1463.84
53970	640.9	53986.8	1309.57
54030	601.5	54089.8	1173.09
54080	573.8	54183	1051.76
54110	553.2	54267.5	943.646
54140	530.6	54343.7	847.931
54210	522.4	54413.6	761.457
54300	527.7	54475.4	686.257
54370	529.6	54532.2	618.098
54400	518.3	54584.6	556.112
54400	485.4	54631.2	501.767

[truncated: 21 more sheets: Fig. 4e, Fig. 4f, Fig. 4g, Fig. 4h, Fig. 4i, Fig. 5b, Fig. 5c, Fig. 5d, Fig. 5e, Fig. 5f, Fig. 5g, Fig. 5h, Fig. 5i, Fig. 6b, Fig. 6c, Fig. 6d, Supplementary Fig. 4, Supplementary Fig. 5a,5b, Supplementary Fig. 6, Supplementary Fig. 7 …]
